# Supplementary material for: Strong Brønsted acid promoted asymmetric hydrogenation of isoquinolines and quinolines catalyzed by a Rh–thiourea chiral phosphine complex via anion binding
Source: PubMed Central journal article supplement — Chem Sci. 2016 Jan 26;7(5):3047–51. doi: 10.1039/c5sc04712a (PMC6005156; doi:10.1039/c5sc04712a), 2016-01-26

## Content

|                                                                                                    |    |
|----------------------------------------------------------------------------------------------------|----|
| 1. General information .....                                                                       | 2  |
| 2. Synthesis of 2-substituted quinolines .....                                                     | 2  |
| 3. Synthesis of 3-substituted isoquinolines .....                                                  | 4  |
| 4. General procedure for preparation of quinoline/isoquinoline hydrochlorides .....                | 7  |
| 5. General procedure for asymmetric hydrogenation of quinolinium/isoquinolinium<br>chlorides ..... | 8  |
| 6. Counterion effects in asymmetric hydrogenation of isoquinolines .....                           | 8  |
| 7. Result of deuterium labeling experiments .....                                                  | 9  |
| 8. Characterization data of chiral THQs and THIQs .....                                            | 11 |
| 9. NMR spectroscopy .....                                                                          | 44 |

## 1. General information

All the reactions dealing with air- or moisture- sensitive compounds were carried out in a dry reaction vessel under nitrogen protection or in the nitrogen-filled glove box. Unless otherwise noted, all reagents and solvents were purchased from commercial suppliers without further purification. THF was dried with sodium chips and indicated by benzophenone. Other anhydrous solvents were purchased from Sigma-Aldrich and transferred by syringe. Purification of products was carried out by chromatography using silica gel from ACROS (0.06-0.20mm). Thin layer chromatography was carried out using silica gel plates from Merk (GF254).  $[\text{Rh}(\text{COD})\text{Cl}]_2$  and other metal precursors were purchased from Heraeus.

$^1\text{H}$  NMR,  $^{13}\text{C}$  NMR and  $^{31}\text{P}$  NMR spectra were recorded on a Bruker Avance (400 MHz) spectrometer with  $\text{CDCl}_3$  as the solvent and tetramethylsilane (TMS) as the internal standard. Chemical shifts are reported in parts per million  $\delta$  (ppm,  $\delta$  scale) downfield from TMS at 0.00 ppm and referenced to the  $\text{CDCl}_3$  at 7.26 ppm for  $^1\text{H}$  NMR or 77.0 ppm for  $^{13}\text{C}$  NMR. Data is reported as: multiplicity (s = singlet, d = doublet, t = triplet, q = quartet, m = multiplet), coupling constant in hertz (Hz) and signal area integration in natural numbers.  $^{13}\text{C}$  NMR and  $^{31}\text{P}$  NMR analyses were ran with decoupling. Enantiomeric excess values were determined with chiral columns on Agilent 7980 Series GC instrument or Agilent 1100 Series HPLC instrument. Optical rotations were measured using a 1 mL cell with a 1 dm path length on a Jasco P-2000 polarimeter at 589 nm and at 20 °C

## 2. Synthesis of 2-substituted quinolines

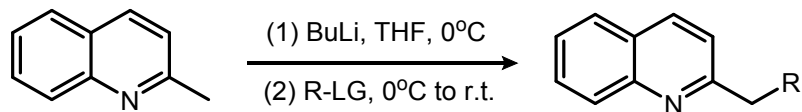

### 2-ethylquinoline<sup>[1]</sup>:

To a solution of 1-methylquinoline (10 mmol) in dry THF (20 ml) at 0°C was added n-butyllithium in THF solution (2.5M) dropwise. The mixture was stirred at room temperature for 1.5h and was cooled back to 0°C. Iodomethane was added dropwise. The mixture was stirred overnight. Water was added carefully to quench the reaction and the mixture was extracted by ethyl acetate (20 ml\*3). Organic phases were combined and dried with sodium sulfate. After removing solvent, the crude product was purified by flash chromatography (on silica gel, eluent: hexanes/ethyl acetate). 2-methylquinoline was obtained as yellow oil with 95% yield.

Known compound. <sup>1</sup>H NMR (400 MHz, CDCl<sub>3</sub>) δ 8.04 (dd, *J* = 11.8, 8.5 Hz, 1H), 7.74 (d, *J* = 8.1 Hz, 1H), 7.65 (ddd, *J* = 8.3, 6.9, 1.4 Hz, 1H), 7.45 (dd, *J* = 11.0, 4.0 Hz, 1H), 7.28 – 7.25 (d, *J* = 8.5 Hz, 1H), 2.99 (q, *J* = 7.6 Hz, 2H), 1.39 (dd, *J* = 7.6 Hz, 3H).

<sup>13</sup>C NMR (400 MHz, CDCl<sub>3</sub>): δ 163.97, 147.87, 136.31, 129.30, 128.79, 127.46, 126.37, 125.63, 120.81, 32.28, 13.97.

### 2-isopropylquinoline<sup>[1]</sup>

Followed the standard procedure above, using 2-ethylquinoline and iodomethane, 2-isopropylquinoline was abotained as yellow oil with 76% yield.

<sup>1</sup>H NMR (400 MHz, CDCl<sub>3</sub>) δ 8.05 (dd, *J* = 8.2, 6.0 Hz, 2H), 7.74 (dd, *J* = 8.1, 1.1 Hz, 1H), 7.65 (ddd, *J* = 8.4, 6.9, 1.4 Hz, 1H), 7.45 (ddd, *J* = 8.1, 7.0, 1.1 Hz, 1H), 7.30 (t, *J* = 8.6 Hz, 1H), 3.26 (hept, *J* = 6.9 Hz, 1H), 1.38 (d, *J* = 6.9 Hz, 3H).

<sup>13</sup>C NMR (400 MHz, CDCl<sub>3</sub>): δ 167.63, 147.79, 136.36, 129.21, 129.04, 127.42, 126.95, 125.62, 119.16, 37.29, 22.52.

### 2-pentylquinoline<sup>[1]</sup>

Yellow oil. <sup>1</sup>H NMR (400 MHz, CDCl<sub>3</sub>) δ 8.04 (t, *J* = 8.4 Hz, 2H), 7.75 (d, *J* = 8.1 Hz, 1H), 7.66 (t, *J* = 7.7 Hz, 1H), 7.45 (t, *J* = 7.5 Hz, 1H), 7.27 (d, *J* = 8.4 Hz, 1H), 2.99 – 2.94 (m, 2H), 1.86 – 1.77 (m, 2H), 1.37 (m, 2H), 0.90 (t, *J* = 6.7 Hz, 3H).

$^{13}\text{C}$  NMR (400 MHz,  $\text{CDCl}_3$ ):  $\delta$  163.10, 147.97, 136.10, 129.25, 128.88, 127.45, 126.72, 125.59, 121.34, 39.35, 31.76, 29.71, 22.56, 14.00.

## 2-undecylquinoline<sup>[1]</sup>

Yellow oil.  $^1\text{H}$  NMR (400 MHz,  $\text{CDCl}_3$ )  $\delta$  7.76 (dd,  $J = 8.1, 1.4$  Hz, 1H), 7.67 (ddd,  $J = 8.3, 6.9, 1.4$  Hz, 1H), 7.46 (ddd,  $J = 8.0, 7.0, 1.0$  Hz, 1H), 7.28 (d,  $J = 8.4$  Hz, 1H), 2.96 (t,  $J = 8.0$  Hz, 2H), 1.86 – 1.76 (m, 2H), 1.46 – 1.19 (m, 16H), 0.90 – 0.85 (m, 3H).

$^{13}\text{C}$  NMR (400 MHz,  $\text{CDCl}_3$ ):  $\delta$  163.12, 147.97, 136.09, 129.25, 128.88, 127.44, 126.72, 125.58, 121.34, 39.40, 31.68, 30.03, 29.58, 29.56, 29.52, 29.30, 22.66, 14.09.

## 2-(3,4-dimethoxyphenethyl)quinoline<sup>[1]</sup>

Yellow oil.  $^1\text{H}$  NMR (400 MHz,  $\text{CDCl}_3$ )  $\delta$  8.07 (d,  $J = 8.4$ , 1H), 8.03 (d,  $J = 8.4$  Hz, 1H), 7.77 (dd,  $J = 8.1, 0.8$  Hz, 1H), 7.69 (ddd,  $J = 8.4, 6.9, 1.4$  Hz, 1H), 7.49 (d,  $J = 8.4, 6.9, 1.4$  Hz, 1H), 7.22 (d,  $J = 8.4$  Hz, 1H), 6.78 (d,  $J = 1.0$  Hz, 1H), 6.75 (s, 1H), 3.84 (s, 1H), 3.79 (s, 1H), 3.27 (dd,  $J = 9.6, 6.2$  Hz, 1H), 3.10 (dd,  $J = 9.5, 6.4$  Hz, 1H).

$^{13}\text{C}$  NMR (400 MHz,  $\text{CDCl}_3$ ):  $\delta$  161.84, 148.83, 148.01, 147.34, 136.16, 134.17, 129.40, 128.86, 127.52, 126.60, 125.79, 121.62, 120.34, 112.01, 111.34, 55.92, 55.77, 41.23, 35.54.

## 3. Synthesis of 3-substituted isoquinolines

3-substituted isoquinolines were synthesized according to literature with modification:<sup>[2]</sup>

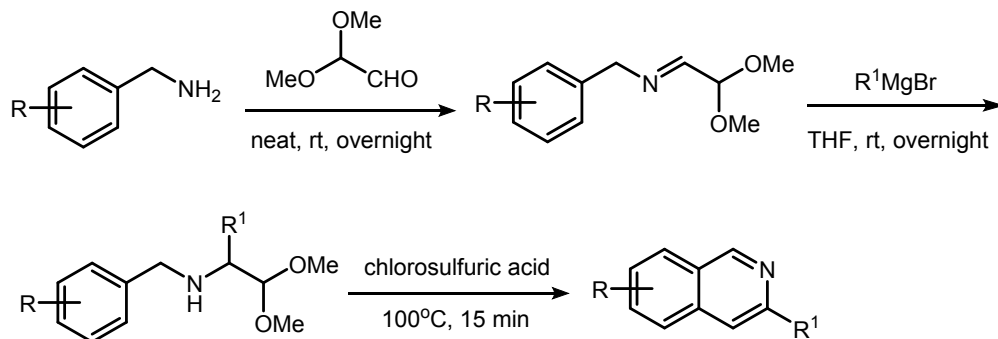

A round-bottom flask was charged with benzylamine (10 mmol) and glyoxal 1,1-dimethyl acetal (1.1 eq., 60% solution in water) was added dropwise. The mixture was stirred at

room temperature overnight and two layers were separated. After removal of the aqueous layer, trace water was removed by azeotropic distillation with toluene. The crude imine was used for next step without purification.

To the solution of this imine in dry THF was added Grignard reagent dropwise at 0°C. The mixture was then stirred at room temperature. Once TLC showed the completion of the reaction (usually overnight), saturated aqueous NH<sub>4</sub>Cl was added at 0°C. The mixture was extracted with ether and the organic layer was dried with anhydrous sodium sulfate. After removal of solvent, the crude product was obtained as yellow or orange oil. After <sup>1</sup>H NMR shows the majority of the desired amine in the crude product, it is used for next step without purification.

A round-bottom flask was filled with nitrogen and charged with chlorosulfuric acid (5ml). The mixture was cooled at 0°C and the crude amine was added dropwise. The mixture was heated at 100°C for 15 min and then cooled to 0°C. The resulting mixture was poured on ice and the neutralized carefully with 40% NaOH solution. After the mixture turned to alkaline, ether was added to extract. The organic phase was dried with sodium sulfate and the solvent was removed under reduced pressure. The residue was purified by flash chromatography (on silica gel, eluent: hexane/ethyl acetate). 3-alkylisoquinoline was obtained as yellow oils.

### **3-ethylisoquinoline**

Yellow oil. 43% yield for 3 steps. <sup>1</sup>H NMR (400 MHz, CDCl<sub>3</sub>): δ 9.06 (s, 1H), 7.75 (d, *J* = 8.1 Hz, 1H), 7.58 (d, *J* = 8.2 Hz, 1H), 7.47 (t, *J* = 6.8 Hz, 1H), 7.35 (t, *J* = 6.8 Hz, 1H), 7.31 (s, 1H), 2.84 (q, *J* = 7.5 Hz, 2H), 1.27 (t, *J* = 7.5 Hz, H).

<sup>13</sup>C NMR (400 MHz, CDCl<sub>3</sub>): δ 155.92, 150.95, 135.55, 129.08, 126.37, 126.02, 125.16, 125.02, 115.98, 30.06, 13.02.

*m/z* (ESI-MS) 158.04 [M + H]<sup>+</sup>.

### **3-butylisoquinoline**

Yellow oil. 38% yield for 3 steps.  $^1\text{H}$  NMR (400 MHz,  $\text{CDCl}_3$ ):  $\delta$  9.19 (s, 1H), 7.90 (d,  $J = 8.1$  Hz, 1H), 7.72 (d,  $J = 8.2$  Hz, 1H), 7.62 (t,  $J = 7.5$  Hz, 1H), 7.50 (t,  $J = 7.5$  Hz, 1H), 7.45 (s, 1H), 2.94 (d,  $J = 8.1$  Hz, 2H), 1.80 (m, 2H), 1.43 (m, 2H), 0.96 (t,  $J = 7.3$  Hz, 3H).

$^{13}\text{C}$  NMR (400 MHz,  $\text{CDCl}_3$ ):  $\delta$  155.88, 152.04, 136.54, 130.14, 127.46, 127.07, 126.22, 126.06, 117.87, 37.84, 32.14, 22.50, 13.97.

$m/z$  (ESI-MS) 186.06  $[\text{M} + \text{H}]^+$ .

### **3,6-dimethylisoquinoline**

White solid. 42% yield for 3 steps.  $^1\text{H}$  NMR (400 MHz,  $\text{CDCl}_3$ ):  $\delta$  9.10 (s, 1H), 7.81 (d,  $J = 8.4$  Hz, 1H), 7.48 (s, 1H), 7.38 (s, 1H), 7.34 (dd,  $J = 8.4, 1.4$  Hz, 1H), 2.38 (s, 3H), 2.52 (s, 3H).

$^{13}\text{C}$  NMR (400 MHz,  $\text{CDCl}_3$ ):  $\delta$  151.67, 151.51, 140.56, 136.92, 128.56, 127.28, 125.37, 124.80, 117.93, 24.18, 22.05.

MP: 76-78°C

$m/z$  (ESI-MS) 158.14  $[\text{M} + \text{H}]^+$ .

### **6-chloro-3-methylisoquinoline**

Yellow oil. 56% yield for 3 steps.  $^1\text{H}$  NMR (400 MHz,  $\text{CDCl}_3$ ):  $\delta$  9.14 (s, 1H), 7.85 (d,  $J = 8.7$  Hz, 1H), 7.69 (d,  $J = 1.8$  Hz, 1H), 7.45 (dd,  $J = 8.7, 2.0$  Hz, 1H), 7.38 (s, 1H), 2.69 (s, 3H).

$^{13}\text{C}$  NMR (400 MHz,  $\text{CDCl}_3$ ):  $\delta$  152.99, 151.72, 137.26, 129.15, 127.41, 125.04, 124.80, 117.53, 24.25.

$m/z$  (ESI-MS) 178.14  $[\text{M} + \text{H}]^+$ .

### **6-fluoro-3-methylisoquinoline**

Yellow oil. 34% yield for 3 steps.  $^1\text{H}$  NMR (400 MHz,  $\text{CDCl}_3$ ):  $\delta$  9.12 (s, 1H), 7.91 (dd,  $J = 8.9, 5.6$  Hz, 1H), 7.41 (s, 1H), 7.30 (dd,  $J = 10.1, 2.0$  Hz, 1H), 7.25 (dd,  $J = 8.7, 2.5$  Hz, 1H), 2.68 (s, 3H).

$^{13}\text{C}$  NMR (400 MHz,  $\text{CDCl}_3$ ):  $\delta$  163.28 (d,  $J = 251.9$  Hz), 152.66, 151.52, 137.94 (d,  $J = 10.5$  Hz), 130.43 (d,  $J = 9.9$  Hz), 124.04, 118.01 (d,  $J = 5.3$  Hz), 116.81 (d,  $J = 25.8$  Hz), 109.14 (d,  $J = 20.9$  Hz).

$m/z$  (ESI-MS) 162.04  $[\text{M} + \text{H}]^+$ .

### **6-trifluoromethyl-3-methylisoquinoline**

Yellow oil. 27% yield for 3 steps.  $^1\text{H}$  NMR (400 MHz,  $\text{CDCl}_3$ ):  $\delta$  9.26 (s, 1H), 8.05 (s, 1H), 8.03 (s, 2H), 7.68 (dd,  $J = 8.4, 1.6$  Hz, 1H), 7.56 (s, 1H), 2.74 (s, 3H).

$^{13}\text{C}$  NMR (400 MHz,  $\text{CDCl}_3$ ):  $\delta$  153.40, 151.92, 144.38, 135.56, 131.90 (q,  $J = 128.4$  Hz), 128.69, 127.47, 123.79 (q,  $J = 18.1$  Hz), 121.96 (q,  $J = 12.1$  Hz), 118.98, 24.20.

$m/z$  (ESI-MS) 211.97  $[\text{M} + \text{H}]^+$ .

### **8-chloro-3-methylisoquinoline**

Yellow oil. 41% yield for 3 steps.  $^1\text{H}$  NMR (400 MHz,  $\text{CDCl}_3$ )  $\delta$  9.56 (s, 1H), 7.64 (dd,  $J = 5.5, 3.7$  Hz, 1H), 7.54 (s, 1H), 7.53 (d,  $J = 2.3$  Hz, 1H), 7.47 (s, 1H), 2.72 (s, 3H).

$^{13}\text{C}$  NMR (400 MHz,  $\text{CDCl}_3$ ):  $\delta$  152.79, 148.94, 137.89, 132.52, 130.19, 126.52, 125.14, 124.01, 118.15, 24.08.

$m/z$  (ESI-MS) 178.16  $[\text{M} + \text{H}]^+$ .

## **4. General procedure for preparation of quinoline/isoquinoline hydrochlorides**

Quinolines or isoquinolines (1mmol) was dissolved in 2 ml dry THF, 1 ml hydrogen chloride solution (2M) in ether (2 eq.) was added dropwise. White precipitate was formed. The resulting mixture was filtered and the solid was washed with dry THF (2 ml\*2). The white solid was collected and dried under vacuum. Quinolium/isoquinolinium chloride was obtained as white solid.

## 5. General procedure for asymmetric hydrogenation of quinolium/isoquinolinium chlorides

In the nitrogen-filled glovebox, solution of  $[\text{Rh}(\text{COD})\text{Cl}]_2$  (4.9 mg, 0.01 mmol) and ligand (2.1 eq.) in 5.0 ml anhydrous solvent was stirred at room temperature for 30 min. A specified volume of the resulting solution (0.5 ml, 1% Rh catalyst) was transferred) by syringe to a Score-Break ampule charged with substrate solution (0.2 mmol in 0.5 ml). The ampule was placed into an autoclave, which was then charged with 40 atm  $\text{H}_2$ . The autoclave was stirred at desired temperature for the indicated period of time. After release of  $\text{H}_2$ , the resulting mixture was concentrated under vacuum. Saturated potassium carbonate solution and dichloromethane was added and the mixture was stirred for 30 min. The organic layer was dried with anhydrous sodium sulfate. After removal of solvent, the crude product was analysed by  $^1\text{H}$  NMR to determine the conversion. The enantiomeric excess was determined by GC or HPLC analysis of the crude product or its corresponding trifluoroacetamides. The absolute configurations were assigned according to literature<sup>[3,4,5]</sup> and their analogues.

## 6. Counterion effects in asymmetric hydrogenation of isoquinolines

When tetrabutylammonium chloride (TBAC) was added, no significant changes in conversion and enantioselectivity was observed (Table S1, entry 2 vs 1). This suggests the spectator role of tetrabutylammonium cation. The introduction of bromide anion from TBAB does not influence this catalytic reaction (Table S1, entry 3 vs 2). The presence of iodide anion decreases the conversion, but the it shows trace influence on the enantioselectivity (Table S1, entry 4 vs 2). Fluoride anion, however, inhibits this catalytic reaction dramatically: no product was observed after adding TBAF (Table S1, entry 5). To gain plausible explanation of these observations, further study will be needed in the future.

**Table S1, Optimization of condition.** <sup>a</sup>

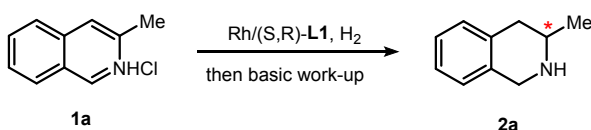



| Entry | additive       | conversion <sup>b</sup> | ee <sup>c</sup> |
|-------|----------------|-------------------------|-----------------|
| 1     | none           | 99%                     | 99%             |
| 2     | TBAC (1.0 eq.) | 98%                     | 99%             |
| 3     | TBAB (1.0 eq.) | 99%                     | 99%             |
| 4     | TBAI (1.0 eq.) | 90%                     | 98%             |
| 5     | TBAF (1.0 eq.) | 0                       | -               |

<sup>a</sup>Reaction condition: 1a (0.1 mmol) in 0.6 ml solvent, 1/[Rh(COD)Cl]<sub>2</sub>/L1 ratio=100/0.5/1, 40 atm H<sub>2</sub>, 25 °C, 48 h;  
<sup>b</sup>conversion was determined by <sup>1</sup>H NMR analysis, no by product was observed; <sup>c</sup>ee was determined by GC with a chiral stationary phase.

## 7. Result of deuterium labeling experiments

Following standard hydrogenation procedure, deuterium labeling experiments were conducted with specific modification.

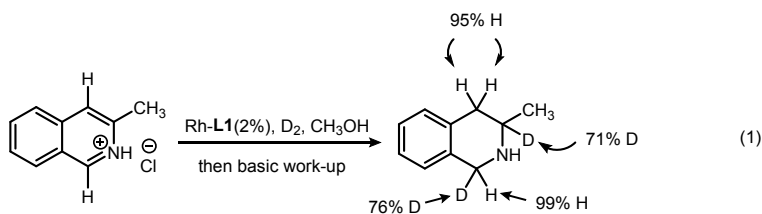



For clarity, combined spectrum for the original 2a and the two deuterated 2a were shown as below:

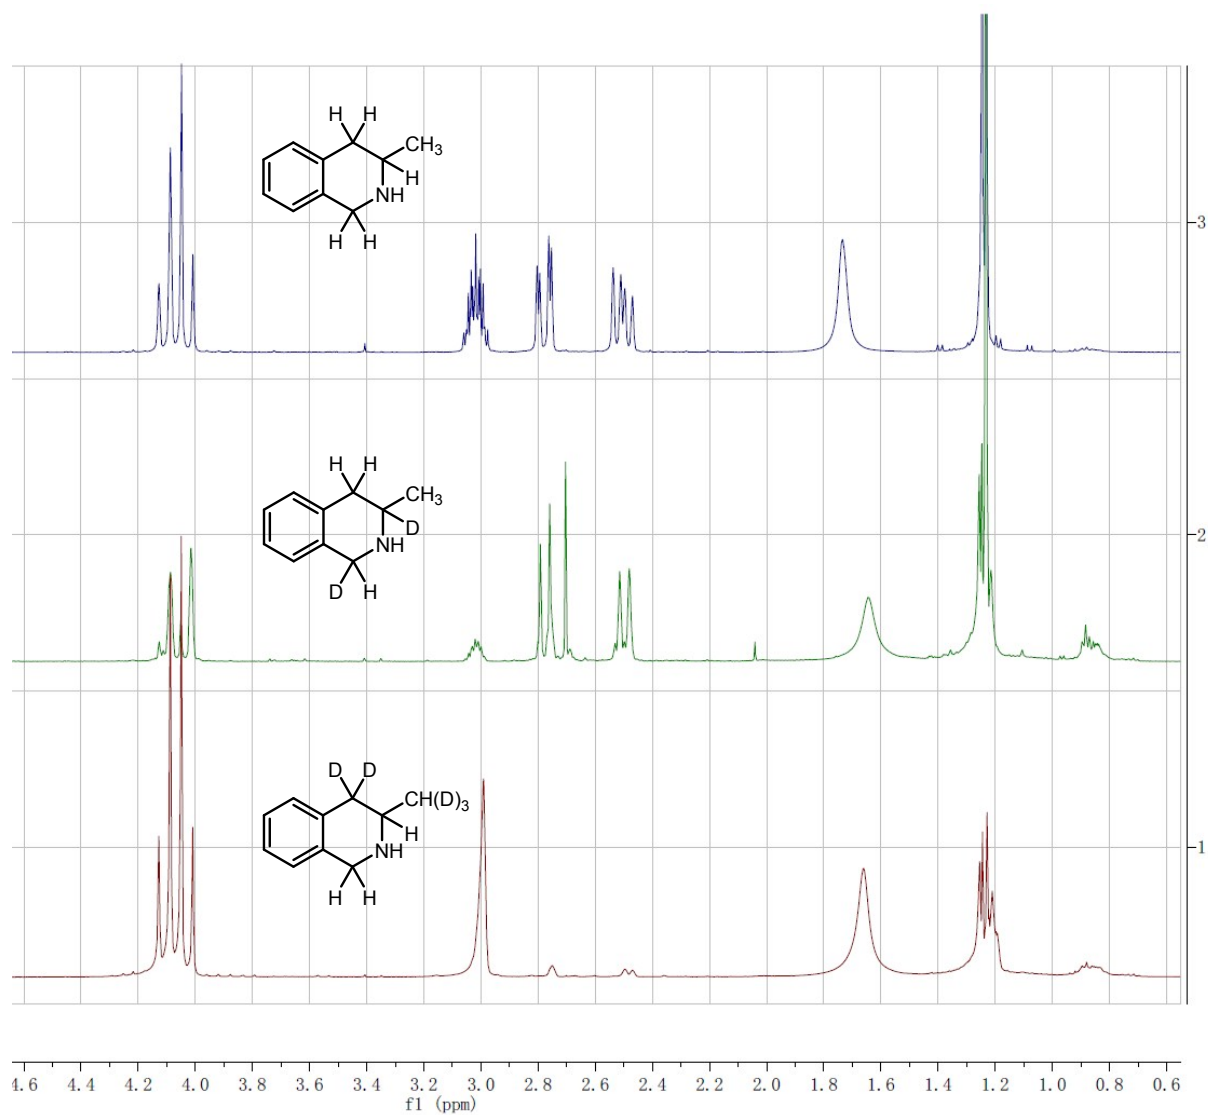

## 8. Characterization data of chiral THQs and THIQs

### 3-methyl-1,2,3,4-tetrahydroisoquinoline (2a)

Yellow oil. <sup>1</sup>H NMR (400 MHz, CDCl<sub>3</sub>): δ 7.11 (m, 2H), 7.06 (m, 1H), 7.01 (t, 1H), 4.11 (d, *J* = 16.0 Hz, 1H), 4.02 (d, *J* = 16.0 Hz, 1H), 3.02 (dq, *J* = 10.3, 6.3, 4.0 Hz, 1H), 2.78

(dd,  $J = 16.4, 3.8$  Hz, 1H), 2.51 (dd,  $J = 16.3, 10.7$  Hz, 1H), 1.73 (br, 1H), 1.24 (d,  $J = 6.3$  Hz, 3H).

$^{13}\text{C}$  NMR (400 MHz,  $\text{CDCl}_3$ ):  $\delta$  135.39, 134.92, 129.11, 126.01, 126.00, 125.70, 49.25, 48.59, 37.26, 22.50.

$[\alpha]^{22}_{\text{D}} +103.6$  (c 0.5,  $\text{CHCl}_3$ ).

$m/z$  (ESI-MS) 148.22  $[\text{M} + \text{H}]^+$ .

Supelco gama Dex 225 column (30 m  $\times$  0.25 mm  $\times$  0.25  $\mu\text{m}$ ), He 1.0 mL/min, column 100  $^\circ\text{C}$ ,  $t_1 = 46.3$  min,  $t_2 = 47.7$  min.

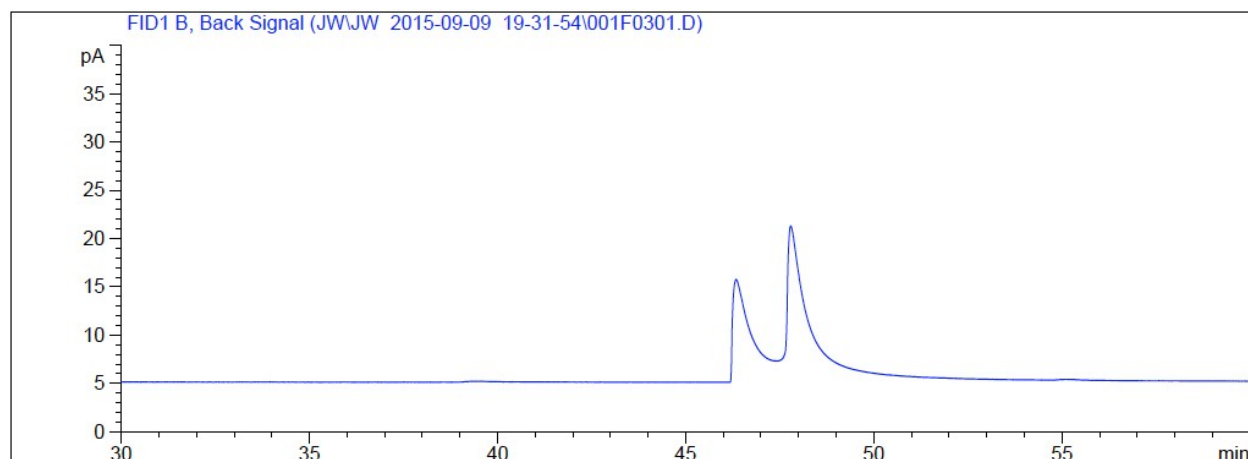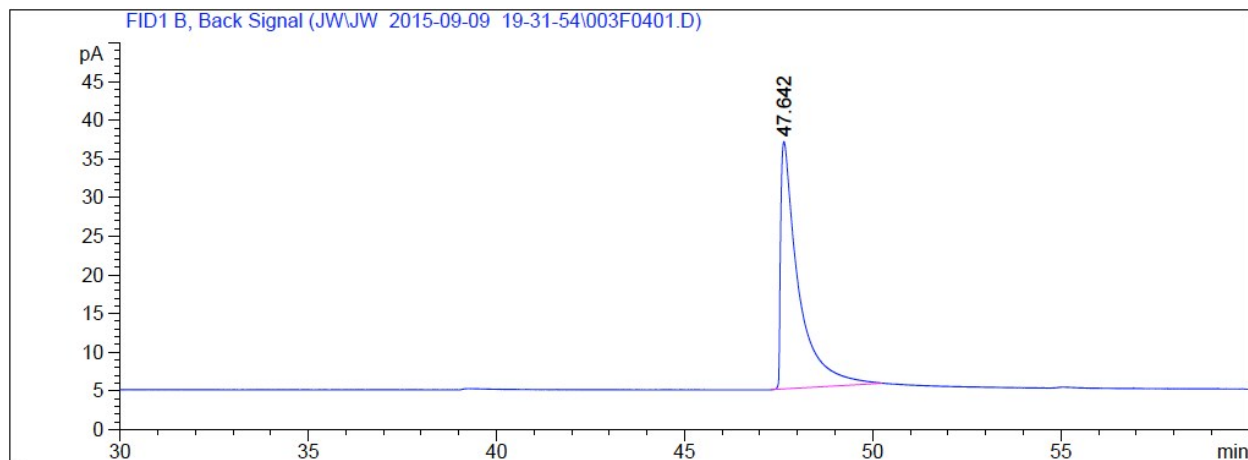

Signal 1: FID1 B, Back Signal

| Peak # | RetTime [min] | Type | Width [min] | Area [pA*s] | Height [pA] | Area %  |
|--------|---------------|------|-------------|-------------|-------------|---------|
| 1      | 47.642        | BB   | 0.4541      | 1052.56445  | 32.00426    | 1.000e2 |

Totals : 1052.56445 32.00426

=====  
\*\*\* End of Report \*\*\*

### 3-ethyl-1,2,3,4-tetrahydroisoquinoline (2b)

Yellow oil.  $^1\text{H}$  NMR (400 MHz,  $\text{CDCl}_3$ ):  $\delta$  7.12 (m, 3H), 7.02 (m, 1H), 4.09 (d,  $J = 12.0$  Hz, 1H), 4.03 (d,  $J = 12.0$  Hz, 2H), 2.79 (tdd,  $J = 10.4, 6.8, 3.8$  Hz, 1H), 2.50 (dd,  $J = 17.0, 11.5$  Hz, 1H), 1.74 (br, 1H), 1.64-1.47 (m, 2H), 1.02 (t, 3H).

$^{13}\text{C}$  NMR (400 MHz,  $\text{CDCl}_3$ ):  $\delta$  135.76, 134.92, 129.46, 126.01, 125.99, 125.65, 55.25, 48.62, 35.11, 29.61, 10.39.

$[\alpha]^{25}_{\text{D}} +97.3$  (c 0.5,  $\text{CHCl}_3$ ).

$m/z$  (ESI-MS) 162.09  $[\text{M} + \text{H}]^+$ .

Supelco gama Dex 225 column (30 m  $\times$  0.25 mm  $\times$  0.25  $\mu\text{m}$ ), He 1.0 mL/min, column 100  $^\circ\text{C}$ ,  $t_1 = 83.2$  min,  $t_2 = 85.3$  min.

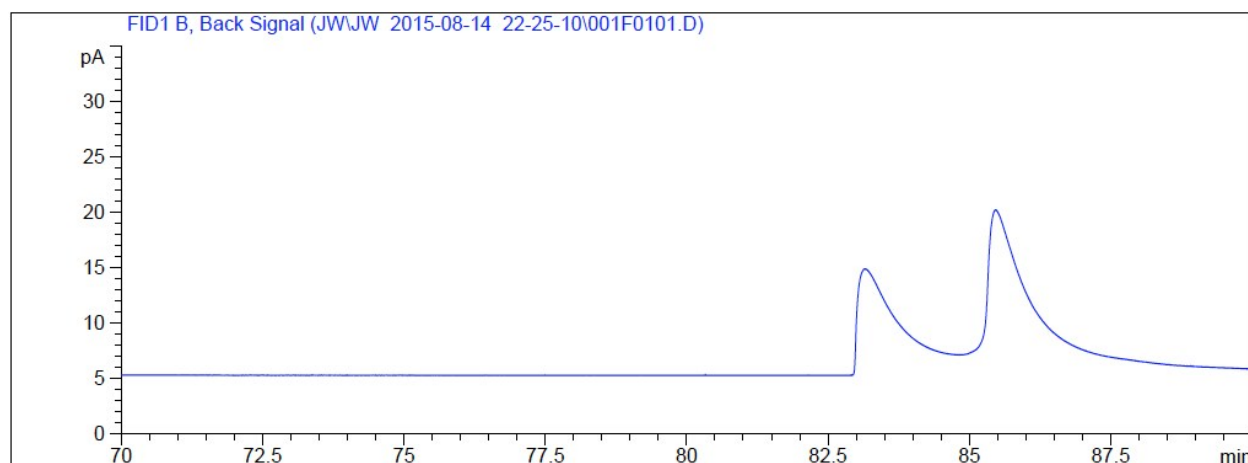



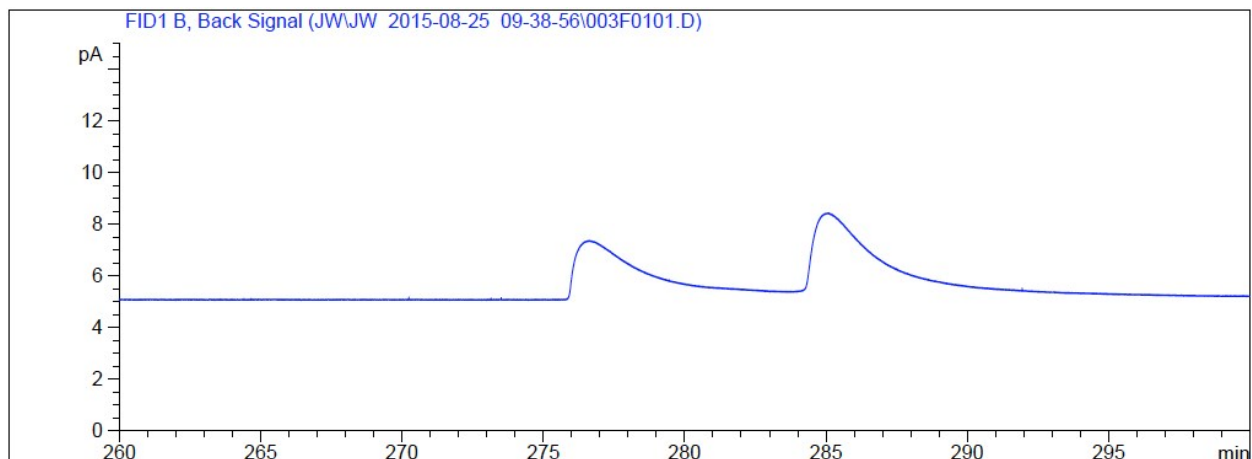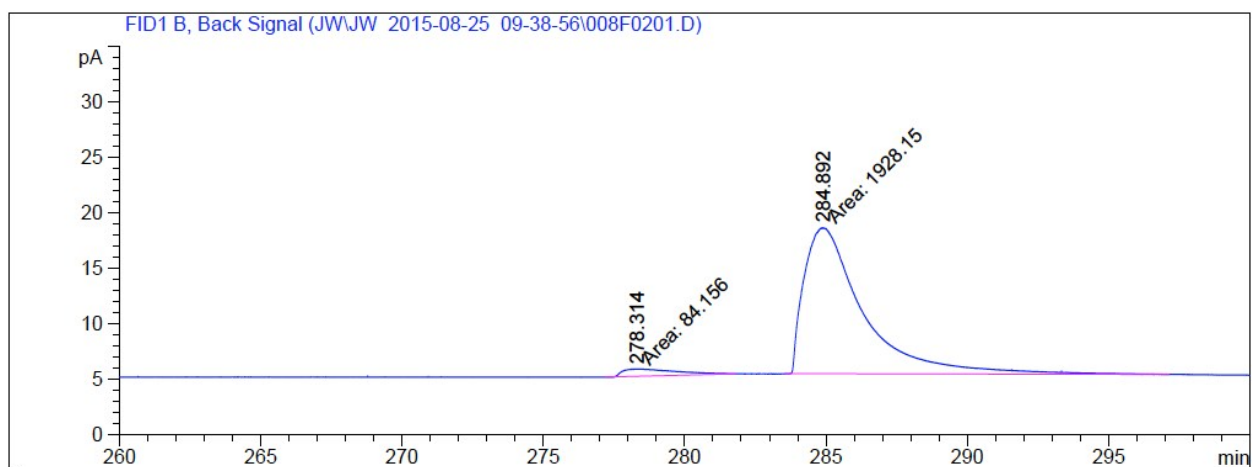

Signal 1: FID1 B, Back Signal

| Peak # | RetTime [min] | Type | Width [min] | Area [pA*s] | Height [pA] | Area %   |
|--------|---------------|------|-------------|-------------|-------------|----------|
| 1      | 278.314       | MM   | 2.1398      | 84.15600    | 6.55473e-1  | 4.18207  |
| 2      | 284.892       | MM   | 2.4380      | 1928.14819  | 13.18125    | 95.81793 |

Totals : 2012.30419 13.83672

=====  
 \*\*\* End of Report \*\*\*

**3,6-dimethyl-1,2,3,4-tetrahydroisoquinoline (2d)**

Yellow oil.  $^1\text{H}$  NMR (400 MHz,  $\text{CDCl}_3$ ):  $\delta$  7.00 – 6.77 (m, 3H), 4.06 (d,  $J = 15.7$  Hz, 1H), 3.99 (d,  $J = 15.8$  Hz, 1H), 3.05–2.94 (m, 1H), 2.73 (dd,  $J = 16.3, 3.4$  Hz, 1H), 2.46 (dd,  $J = 16.0, 10.8$  Hz, 1H), 2.29 (s, 3H), 1.69 (s, 1H), 1.23 (d,  $J = 6.3$  Hz, 3H).

$^{13}\text{C}$  NMR (400 MHz,  $\text{CDCl}_3$ ):  $\delta$  135.45, 134.76, 132.38, 129.60, 126.65, 125.88, 49.28, 48.33, 37.27, 22.49, 20.98.

$[\alpha]^{22}_{\text{D}} +87.4$  (c 0.5,  $\text{CHCl}_3$ ).

$m/z$  (ESI-MS) 162.08  $[\text{M} + \text{H}]^+$ .

Supelco Chiral Select 1000 column (30 m  $\times$  0.25 mm  $\times$  0.25  $\mu\text{m}$ ) for its corresponding trifluoroacetamide, He 1.0 mL/min, column 120  $^\circ\text{C}$ ,  $t_1 = 91.4$  min,  $t_2 = 93.0$  min.

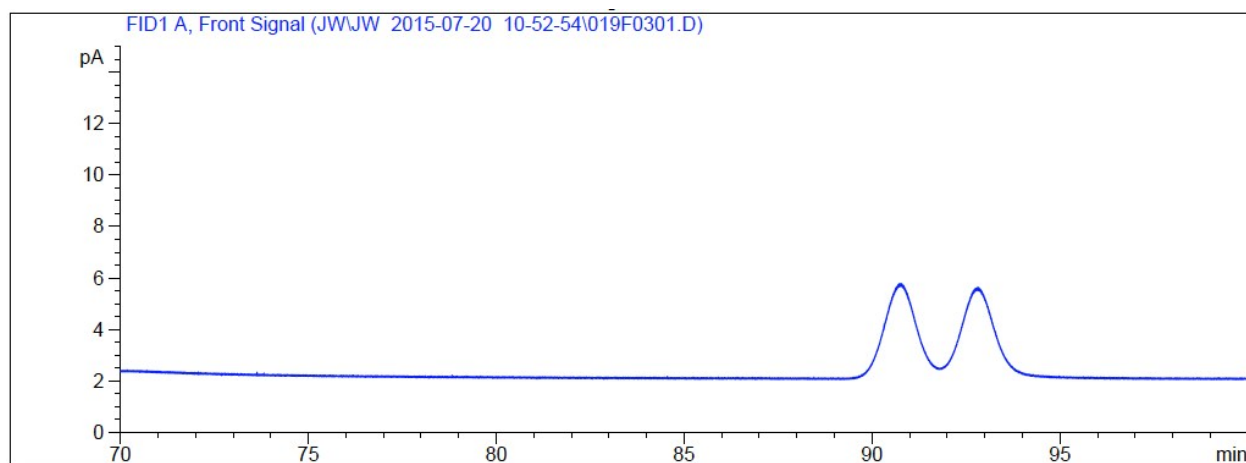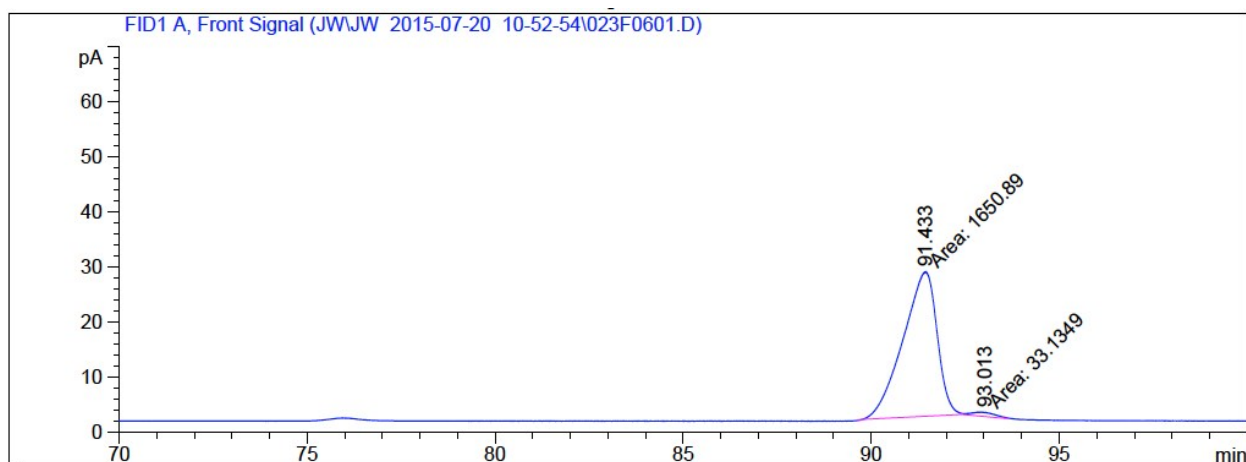



Signal 1: FID1 A, Front Signal

| Peak # | RetTime [min] | Type | Width [min] | Area [pA*s] | Height [pA] | Area %   |
|--------|---------------|------|-------------|-------------|-------------|----------|
| 1      | 91.433        | MM   | 1.0499      | 1650.89038  | 26.20647    | 98.03240 |
| 2      | 93.013        | MM   | 0.7184      | 33.13491    | 7.68718e-1  | 1.96760  |

Totals : 1684.02529 26.97519

=====  
\*\*\* End of Report \*\*\*

### 6-trifluoromethyl-3-methyl-1,2,3,4-tetrahydroisoquinoline (2e)

Yellow oil.  $^1\text{H}$  NMR (400 MHz,  $\text{CDCl}_3$ ):  $\delta$  7.36 (d,  $J = 8.1$  Hz, 1H), 7.32 (s, 1H), 7.12 (d,  $J = 8.0$  Hz, 1H), 3.14 (d,  $J = 16.4$  Hz, 1H), 3.09 (d,  $J = 16.4$  Hz, 1H), 2.83 (dd,  $J = 16.5$ , 3.7 Hz, 1H), 2.54 (dd,  $J = 16.4$ , 10.6 Hz, 1H), 1.26 (d,  $J = 6.3$  Hz, 3H).

$^{13}\text{C}$  NMR (400 MHz,  $\text{CDCl}_3$ ):  $\delta$  139.32, 135.72, 128.46 (q,  $J = 127.6$  Hz), 126.46, 125.96 (q,  $J = 15.2$  Hz), 122.97, 122.48 (q,  $J = 7.0$  Hz), 49.03, 48.44, 37.13, 22.27.

$[\alpha]^{22}_{\text{D}} +80.2$  (c 0.5,  $\text{CHCl}_3$ ).

$m/z$  (ESI-MS) 216.01  $[\text{M} + \text{H}]^+$ .

Supelco gamma Dex 225 column (30 m  $\times$  0.25 mm  $\times$  0.25  $\mu\text{m}$ ), He 1.0 mL/min, column 100  $^\circ\text{C}$ ,  $t_1 = 60.8$  min,  $t_2 = 64.7$  min.

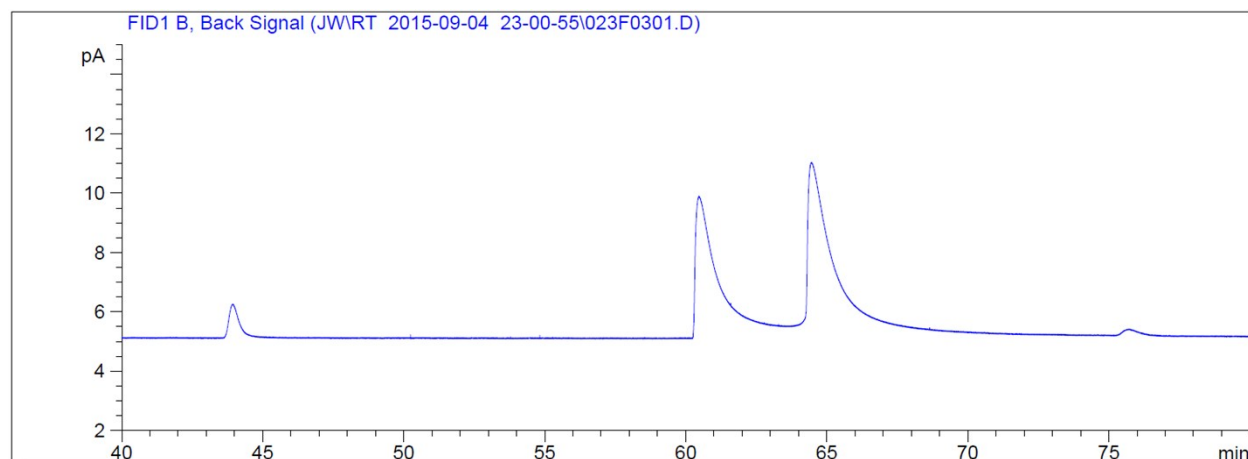



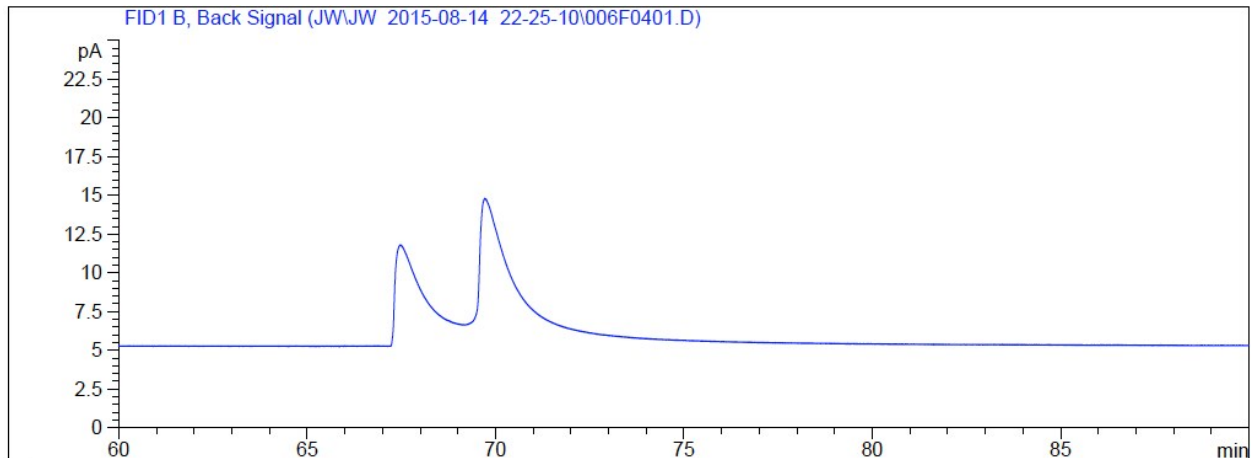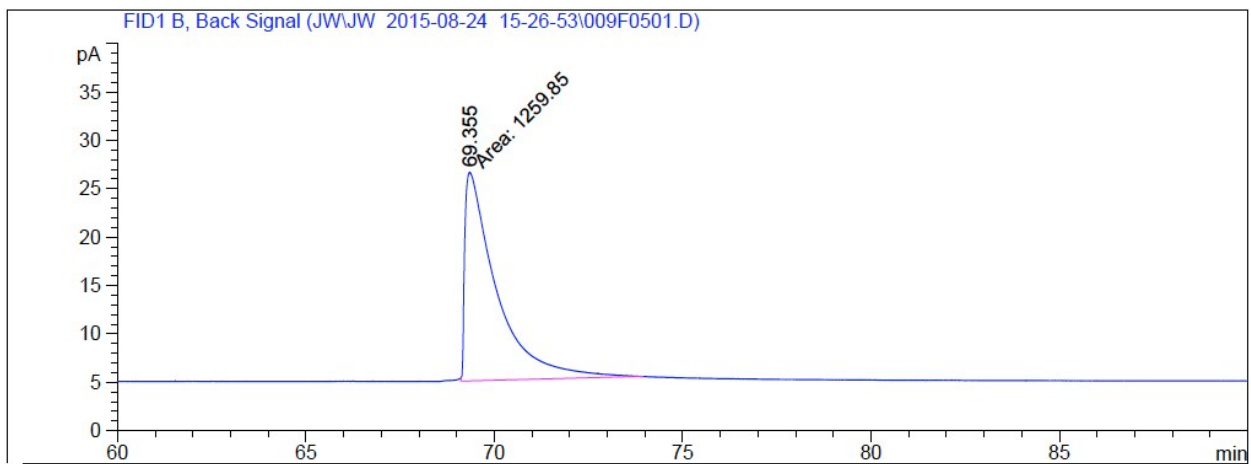

Signal 1: FID1 B, Back Signal

| Peak # | RetTime [min] | Type | Width [min] | Area [pA*s] | Height [pA] | Area %  |
|--------|---------------|------|-------------|-------------|-------------|---------|
| 1      | 69.355        | MM   | 0.9725      | 1259.84631  | 21.59215    | 1.000e2 |

Totals : 1259.84631 21.59215

=====  
\*\*\* End of Report \*\*\*

**6-fluoro-3-methyl-1,2,3,4-tetrahydroisoquinoline (2g)**

Yellow oil.  $^1\text{H}$  NMR (400 MHz,  $\text{CDCl}_3$ ):  $\delta$  6.96 (dd,  $J = 8.3, 5.8$  Hz, 1H), 6.81 (td,  $J = 8.5, 2.6$  Hz, 1H), 6.76 (dd,  $J = 9.6, 2.5$  Hz, 1H), 4.05 (d,  $J = 15.6$  Hz, 2H), 4.00 (d,  $J = 15.6$  Hz, 2H), 2.99 (dq,  $J = 10.3, 6.3, 4.0$  Hz, 1H), 2.75 (dd,  $J = 16.5, 3.8$  Hz, 1H), 2.49 (dd,  $J = 16.5, 10.7$  Hz, 1H), 1.24 (d,  $J = 6.3$  Hz, 3H).

$^{13}\text{C}$  NMR (400 MHz,  $\text{CDCl}_3$ ):  $\delta$  161.18 (d,  $J = 964.4$  Hz), 137.00 (d,  $J = 29.4$  Hz), 130.90 (d,  $J = 11.6$  Hz), 127.35 (d,  $J = 32.4$  Hz), 115.34 (d,  $J = 81.2$  Hz), 112.79 (d,  $J = 86.0$  Hz), 48.93, 48.05, 37.32, 22.30.

$^{19}\text{F}$  NMR (500 MHz,  $\text{CDCl}_3$ ):  $\delta$  -117.42.

$[\alpha]_D^{22} +82.1$  (c 0.5,  $\text{CHCl}_3$ ).

$m/z$  (ESI-MS) 166.24  $[\text{M} + \text{H}]^+$ .

Supelco gamma Dex 225 column (30 m  $\times$  0.25 mm  $\times$  0.25  $\mu\text{m}$ ), He 1.0 mL/min, column 100  $^\circ\text{C}$ ,  $t_1 = 58.0$  min,  $t_2 = 60.0$  min.

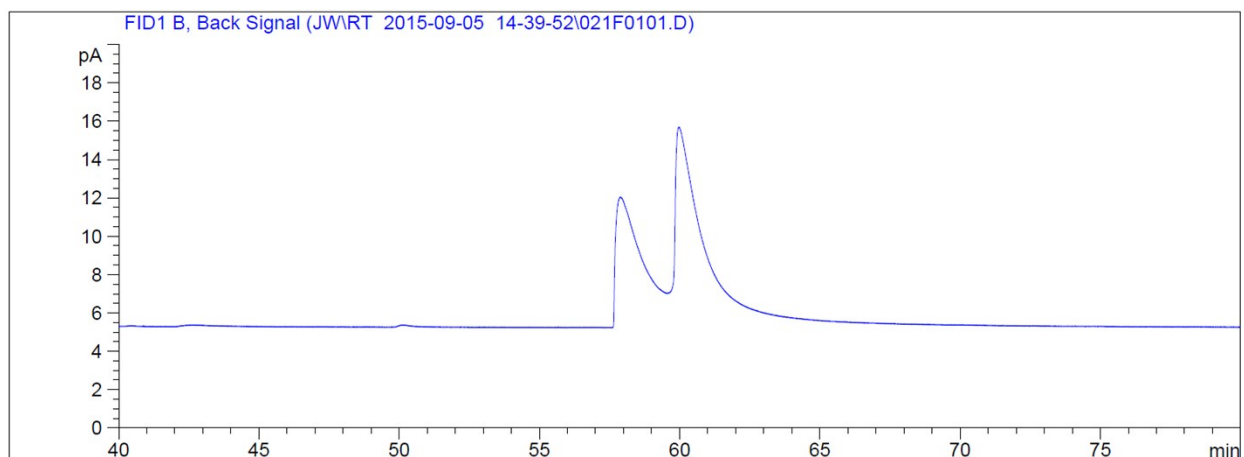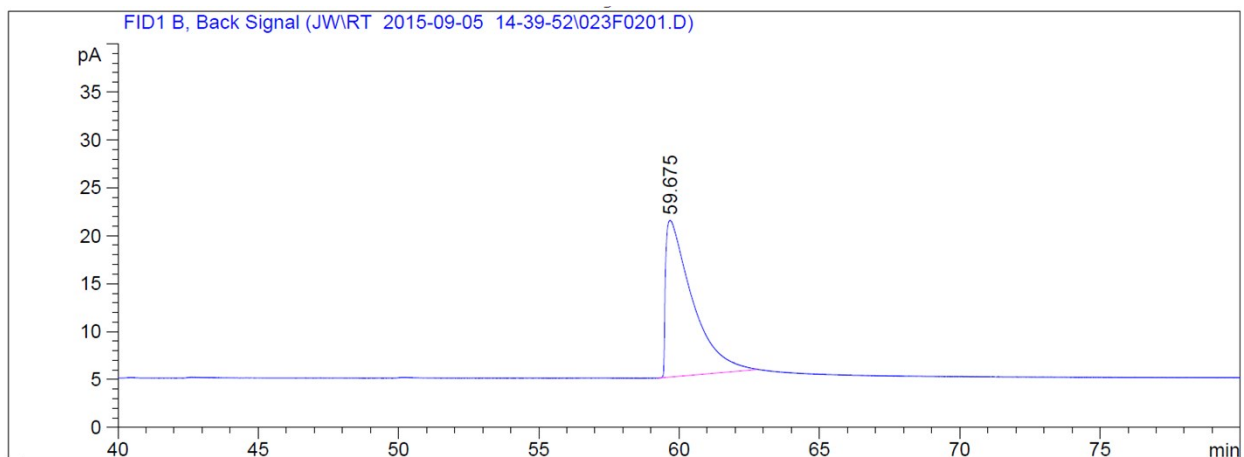

Signal 1: FID1 B, Back Signal

| Peak #   | RetTime [min] | Type | Width [min] | Area [pA*s] | Height [pA] | Area %  |
|----------|---------------|------|-------------|-------------|-------------|---------|
| 1        | 59.675        | BB   | 0.8510      | 1079.47339  | 16.33518    | 1.000e2 |
| Totals : |               |      |             | 1079.47339  | 16.33518    |         |

=====  
\*\*\* End of Report \*\*\*

### 8-chloro-3-methyl-1,2,3,4-tetrahydroisoquinoline (2h)

Yellow oil.  $^1\text{H}$  NMR (400 MHz,  $\text{CDCl}_3$ ):  $\delta$  7.16 (d,  $J = 7.8$  Hz, 1H), 7.06 (t,  $J = 7.7$  Hz, 1H), 6.97 (d,  $J = 7.5$  Hz, 1H), 4.20 (d,  $J = 16.9$  Hz, 1H), 3.94 (d,  $J = 16.9$  Hz, 1H), 2.97 (dq,  $J = 10.1, 6.3, 3.8$  Hz, 1H), 2.77 (dd,  $J = 16.3, 3.5$  Hz, 1H), 2.50 (dd,  $J = 16.3, 10.6$  Hz, 1H), 1.67 (s, 1H), 1.24 (d,  $J = 6.3$  Hz, 3H).

$^{13}\text{C}$  NMR (400 MHz,  $\text{CDCl}_3$ ):  $\delta$  137.42, 133.23, 132.21, 127.52, 126.84, 126.52, 48.57, 46.79, 37.36, 22.19.

$[\alpha]^{22}_{\text{D}} +117.7$  (c 0.5,  $\text{CHCl}_3$ ).

$m/z$  (ESI-MS) 182.09, 184.01  $[\text{M} + \text{H}]^+$ .

Supelco gamma Dex 225 column (30 m  $\times$  0.25 mm  $\times$  0.25  $\mu\text{m}$ ), He 1.0 mL/min, column 100  $^\circ\text{C}$ ,  $t_1 = 158.2$  min,  $t_2 = 160.4$  min.

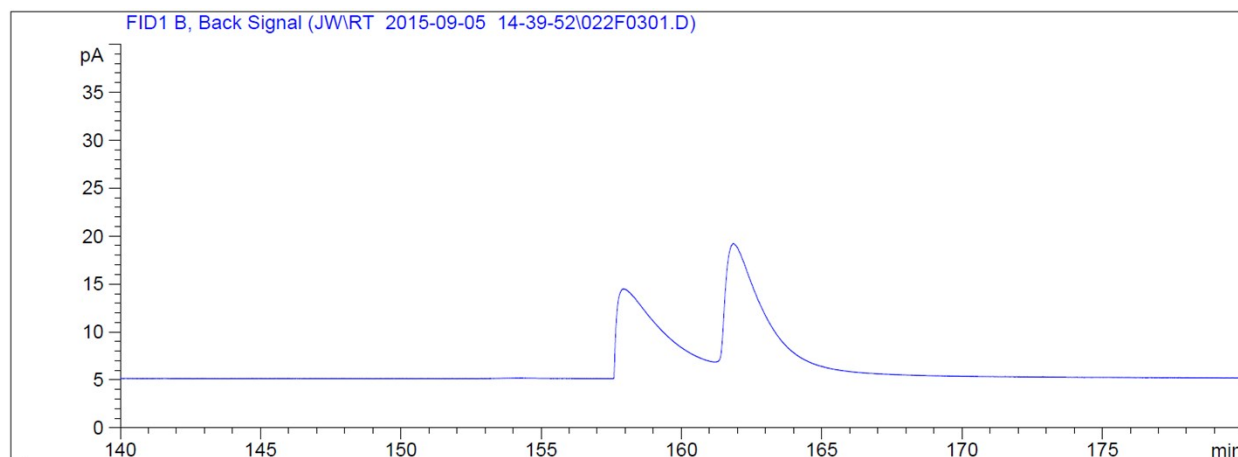

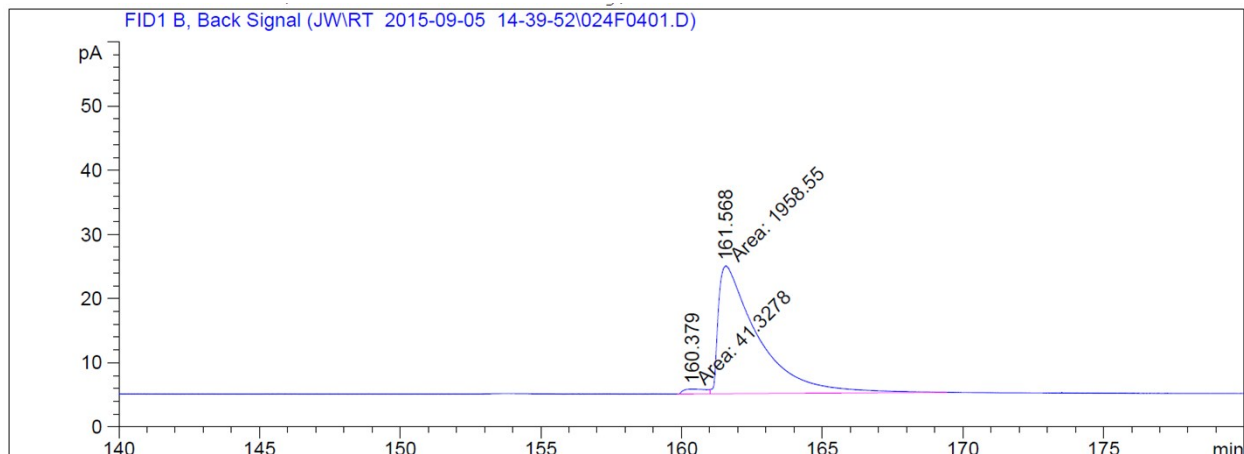

Signal 1: FID1 B, Back Signal

| Peak # | RetTime [min] | Type | Width [min] | Area [pA*s] | Height [pA] | Area %   |
|--------|---------------|------|-------------|-------------|-------------|----------|
| 1      | 160.379       | MF   | 0.9163      | 41.32780    | 7.51749e-1  | 2.06652  |
| 2      | 161.568       | FM   | 1.6383      | 1958.54700  | 19.92477    | 97.93348 |

Totals : 1999.87479 20.67652

\*\*\* End of Report \*\*\*

### 1-methyl-1,2,3,4-tetrahydroisoquinoline (2i)

Yellow oil.  $^1\text{H}$  NMR (400 MHz,  $\text{CDCl}_3$ )  $\delta$  7.22 – 7.03 (m, 4H), 4.14 (d,  $J = 6.8$  Hz, 1H), 3.31 (M, 1H), 3.03 (m, 1H), 2.92 (m, 1H), 2.82 – 2.60 (m, 1H), 2.25 (br, 1H), 1.47 (d,  $J = 5.6$  Hz, 3H).

$^{13}\text{C}$  NMR (400 MHz,  $\text{CDCl}_3$ ):  $\delta$  140.32, 134.68, 129.20, 125.99, 129.90 (overlap), 51.57, 41.71, 29.91, 22.63.

$[\alpha]^{22}_{\text{D}} -77.0$  (c 0.5,  $\text{CHCl}_3$ ).

Supelco Chiral Select 1000 column (30 m  $\times$  0.25 mm  $\times$  0.25  $\mu\text{m}$ ) for its corresponding trifluoroacetamide, He 1.0 mL/min, column 120  $^\circ\text{C}$ ,  $t_1 = 56.8$  min,  $t_2 = 58.3$  min.

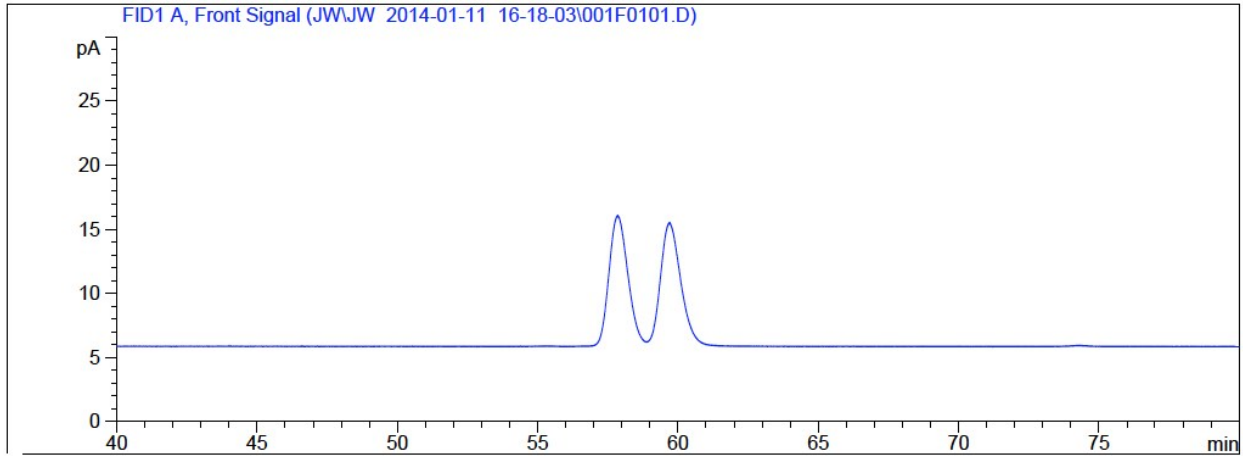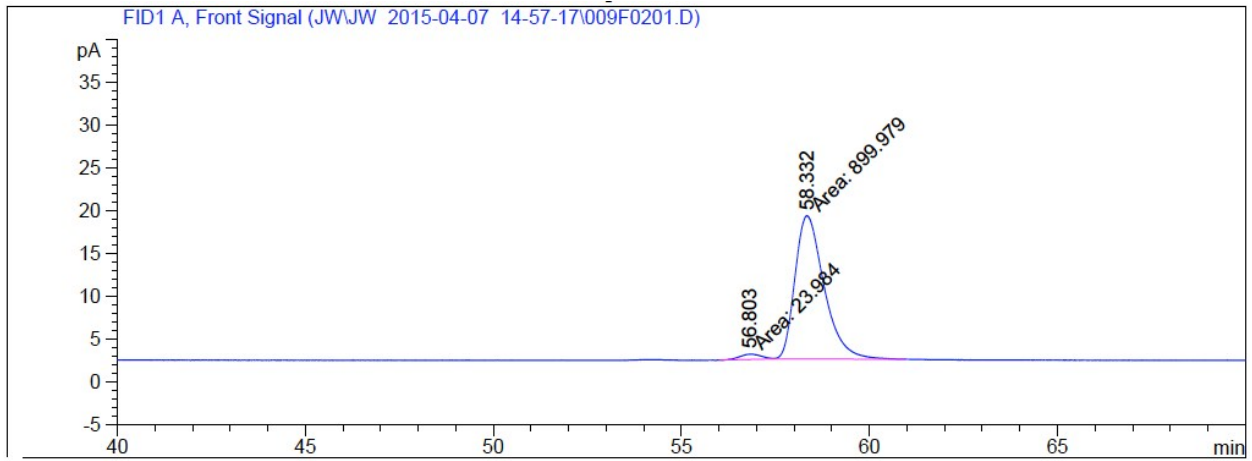

Signal 1: FID1 A, Front Signal

| Peak # | RetTime [min] | Type | Width [min] | Area [pA*s] | Height [pA] | Area %   |
|--------|---------------|------|-------------|-------------|-------------|----------|
| 1      | 56.803        | MM   | 0.6386      | 23.98396    | 6.25927e-1  | 2.59577  |
| 2      | 58.332        | MM   | 0.8972      | 899.97919   | 16.71776    | 97.40423 |

Totals : 923.96314 17.34369

=====  
 \*\*\* End of Report \*\*\*

**3-phenyl-1,2,3,4-tetrahydroisoquinoline (2j)**

Yellow oil.  $^1\text{H}$  NMR (400 MHz,  $\text{CDCl}_3$ )  $\delta$  7.43 (d,  $J = 7.9$  Hz, 2H), 7.36 (dd,  $J = 8.0, 6.5$  Hz, 2H), 7.28 (t,  $J = 7.2$  Hz, 1H), 7.18-7.05 (m, 4H), 4.26 (d,  $J = 15.6$  Hz, 1H), 4.16 (d,  $J = 15.6$  Hz, 1H), 4.00 (t,  $J = 7.5$  Hz, 1H), 2.97 (d,  $J = 7.3$  Hz, 2H), 1.93 (br, 1H).

$^{13}\text{C}$  NMR (400 MHz,  $\text{CDCl}_3$ ):  $\delta$  144.33, 135.04, 134.92, 129.10, 128.63, 127.39, 126.55, 126.26, 126.18, 125.90, 58.61, 49.27, 37.73.

Daicel Chiralpak OD-H for its corresponding trifluoroacetamide, hexanes/*i*-PrOH = 98/2, Flow rate = 1.0 ml/min, UV = 220 nm,  $t_1 = 10.4$  min,  $t_2 = 13.1$  min.

$[\alpha]_D^{22} +100.3$  (c 0.5,  $\text{CHCl}_3$ ) for (R) isomer<sup>[7]</sup>.

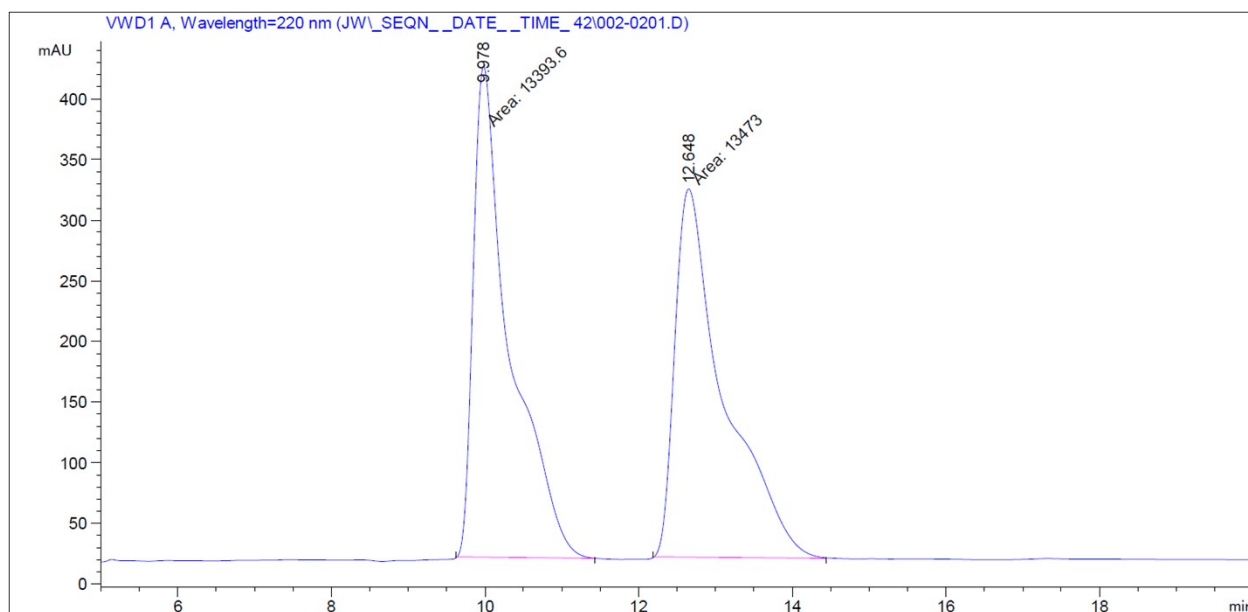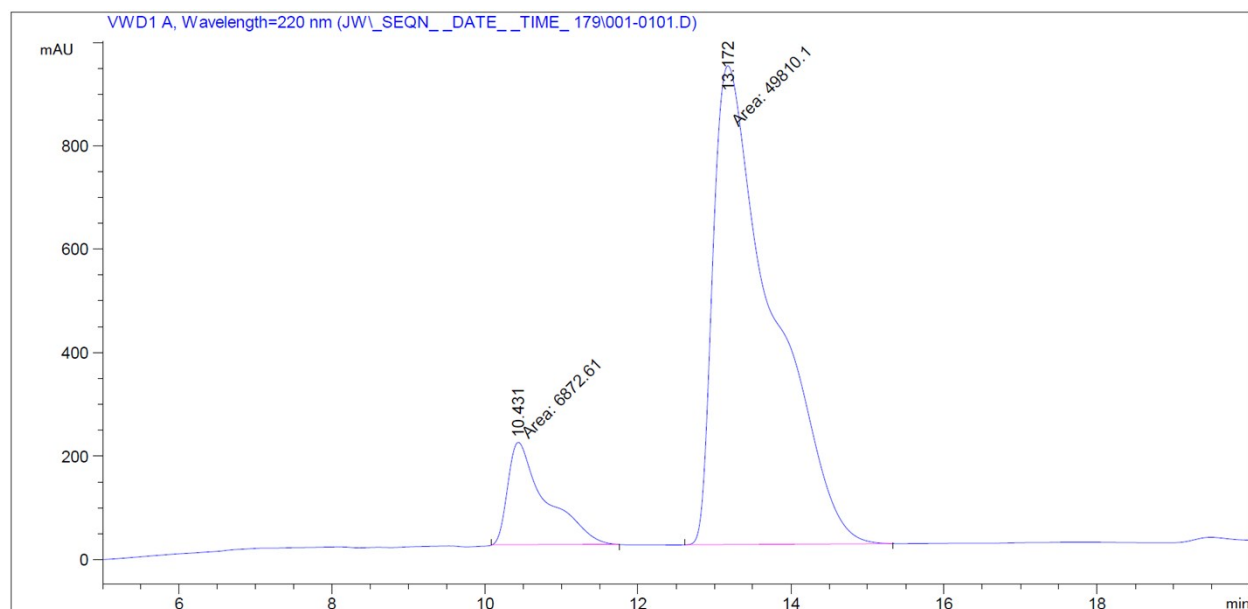



Signal 1: VWD1 A, Wavelength=220 nm

| Peak # | RetTime [min] | Type | Width [min] | Area mAU   | Area *s | Height [mAU] | Area %  |
|--------|---------------|------|-------------|------------|---------|--------------|---------|
| 1      | 10.431        | MM   | 0.5781      | 6872.61035 |         | 198.15254    | 12.1247 |
| 2      | 13.172        | MM   | 0.8965      | 4.98101e4  |         | 925.97284    | 87.8753 |

Totals : 5.66827e4 1124.12538

### 2-methyl-1,2,3,4-tetrahydroquinoline (4a)

Yellow oil.  $^1\text{H}$  NMR (400 MHz,  $\text{CDCl}_3$ ):  $\delta$  6.98 – 6.92 (m, 2H), 6.59 (td,  $J = 7.4, 1.1$  Hz, 1H), 6.45 (dd,  $J = 5.2, 3.2$  Hz, 1H), 3.67 (b, 1H), 3.43 – 3.35 (m, 1H), 2.83 (ddd,  $J = 16.9, 11.5, 5.6$  Hz, 1H), 2.75 – 2.68 (m, 1H), 1.95 – 1.88 (m, 1H), 1.58 (dddd,  $J = 12.8, 11.6, 10.0, 5.4$  Hz, 1H), 1.20 (d,  $J = 6.3$  Hz, 3H).

$^{13}\text{C}$  NMR (400 MHz,  $\text{CDCl}_3$ ):  $\delta$  143.73, 128.22, 125.65, 120.09, 115.97, 112.98, 46.15, 29.12, 25.55, 21.56.

$[\alpha]_D^{22} -44.3$  (c 0.5,  $\text{CHCl}_3$ ).

Supelco gama Dex 225 column (30 m  $\times$  0.25 mm  $\times$  0.25  $\mu\text{m}$ ), He 1.0 mL/min, column 120  $^\circ\text{C}$ ,  $t_1 = 30.5$  min,  $t_2 = 31.3$  min.

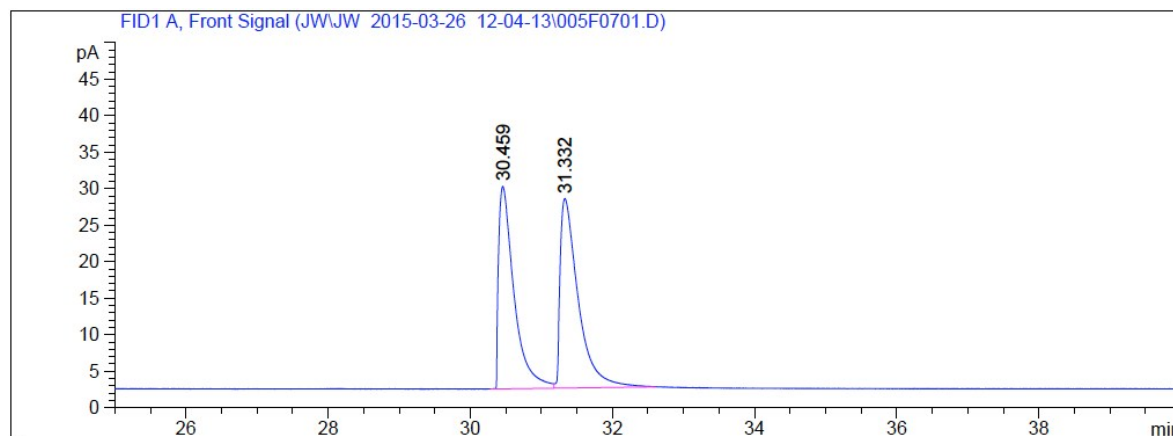

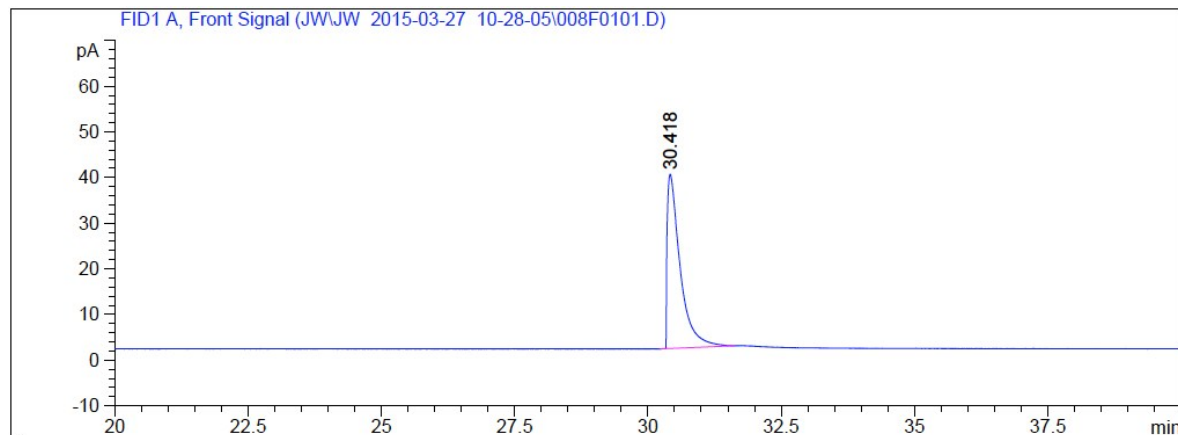

Signal 1: FID1 A, Front Signal

| Peak #   | RetTime [min] | Type | Width [min] | Area [pA*s] | Height [pA] | Area %  |
|----------|---------------|------|-------------|-------------|-------------|---------|
| 1        | 30.418        | BB   | 0.2479      | 643.22015   | 38.15113    | 1.000e2 |
| Totals : |               |      |             | 643.22015   | 38.15113    |         |

=====  
 \*\*\* End of Report \*\*\*

## 2-ethyl-1,2,3,4-tetrahydroquinoline (4b)

Yellow oil.  $^1\text{H}$  NMR (400 MHz,  $\text{CDCl}_3$ ):  $\delta$  6.95 (t,  $J = 7.2$  Hz, 2H), 6.59 (t,  $J = 7.3$  Hz, 1H), 6.47 (d,  $J = 8.1$  Hz, 1H), 3.76 (br, 1H), 3.20 – 3.12 (m, 1H), 2.81 (ddd,  $J = 16.4$ , 11.0, 5.5 Hz, 1H), 2.76 – 2.68 (m, 1H), 2.00 – 1.92 (m, 1H), 1.65 – 1.55 (m, 1H), 1.51 (dd,  $J = 14.3$ , 7.2 Hz, 2H), 0.98 (t,  $J = 7.5$  Hz, 3H).

$^{13}\text{C}$  NMR (400 MHz,  $\text{CDCl}_3$ ):  $\delta$  143.72, 128.18, 125.66, 120.36, 115.84, 112.96, 52.03, 28.73, 26.57, 25.38, 8.98.

$[\alpha]^{22}_{\text{D}} -74.4$  (c 0.5,  $\text{CHCl}_3$ ).

Supelco gama Dex 225 column (30 m  $\times$  0.25 mm  $\times$  0.25  $\mu\text{m}$ ), He 1.0 mL/min, column 120  $^\circ\text{C}$ ,  $t_1 = 51.3$  min,  $t_2 = 53.7$  min.



4.2 Hz, 1H), 2.76 – 2.68 (m, 1H), 1.91 (ddt,  $J = 5.9, 4.5, 3.2$  Hz, 1H), 1.76 – 1.58 (m, 2H), 0.98 (dd,  $J = 10.2, 6.8$  Hz, 6H).  $\delta$  6.95 (t, 2H), 6.58 (t, 1H), 6.47 (d, 1H), 3.03 (m, 1H), 2.75 (m, 2H), 1.91 (m, 1H), 1.69 (m, 2H), 0.98 (dd, 6H).

$^{13}\text{C}$  NMR (400 MHz,  $\text{CDCl}_3$ ):  $\delta$  144.00, 128.08, 125.66, 120.40, 115.70, 112.93, 56.29, 31.51, 25.61, 23.53, 17.38 (d).

$[\alpha]^{22}_{\text{D}} -44.0$  (c 0.5,  $\text{CHCl}_3$ ).

Supelco gama Dex 225 column (30 m  $\times$  0.25 mm  $\times$  0.25  $\mu\text{m}$ ), He 1.0 mL/min, column 140  $^\circ\text{C}$ ,  $t_1 = 27.9$  min,  $t_2 = 29.4$  min.

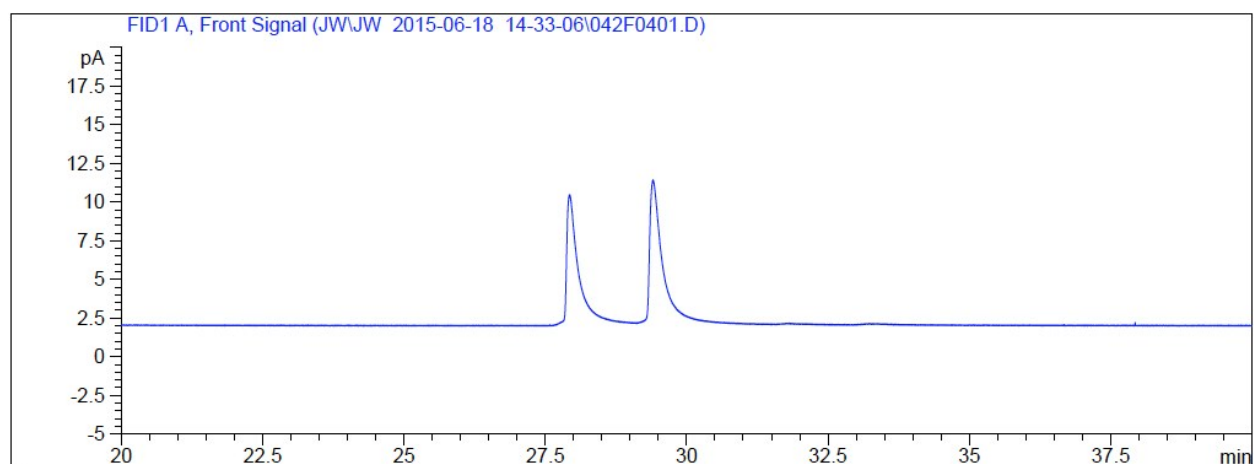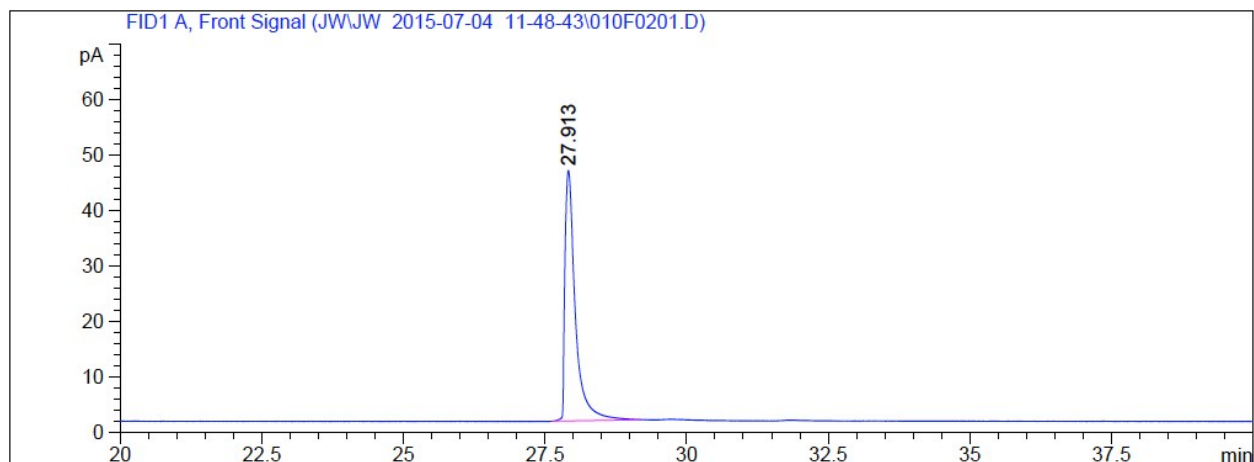

Signal 1: FID1 A, Front Signal

| Peak #   | RetTime [min] | Type | Width [min] | Area [pA*s] | Height [pA] | Area %  |
|----------|---------------|------|-------------|-------------|-------------|---------|
| 1        | 27.913        | BB   | 0.1944      | 578.82666   | 45.13346    | 1.000e2 |
| Totals : |               |      |             | 578.82666   | 45.13346    |         |

=====  
\*\*\* End of Report \*\*\*

### 2-pentyl-1,2,3,4-tetrahydroquinoline (4d)

Yellow oil.  $^1\text{H}$  NMR (400 MHz,  $\text{CDCl}_3$ ):  $\delta$  6.95 (t,  $J = 7.2$  Hz, 2H), 6.58 (t,  $J = 7.4$ , 1H), 6.46 (d,  $J = 7.5$  Hz, 1H), 3.75 (br, 1H), 3.22 (dtd,  $J = 9.4, 6.3, 2.9$  Hz, 1H), 2.86 – 2.75 (m, 1H), 2.71 (dt,  $J = 16.3, 4.8$  Hz, 1H), 1.99 – 1.91 (m, 1H), 1.64 – 1.53 (m, 1H), 1.47 (t,  $J = 6.7$  Hz, 2H), 1.42 – 1.27 (m, 6H), 0.90 (t,  $J = 6.9$  Hz, 3H).

$^{13}\text{C}$  NMR (400 MHz,  $\text{CDCl}_3$ ):  $\delta$  143.71, 128.19, 125.65, 120.36, 115.84, 112.99, 50.58, 35.66, 30.93, 27.11, 25.40, 24.36, 21.59, 12.98 (d).

$[\alpha]^{22}_{\text{D}} -78.2$  (c 0.5,  $\text{CHCl}_3$ ).

Daicel Chiralpak OD-H, hexanes/*i*-PrOH = 99/1, Flow rate = 1.0 ml/min, UV = 254 nm,  $t_1 = 6.9$  min,  $t_2 = 8.0$  min.

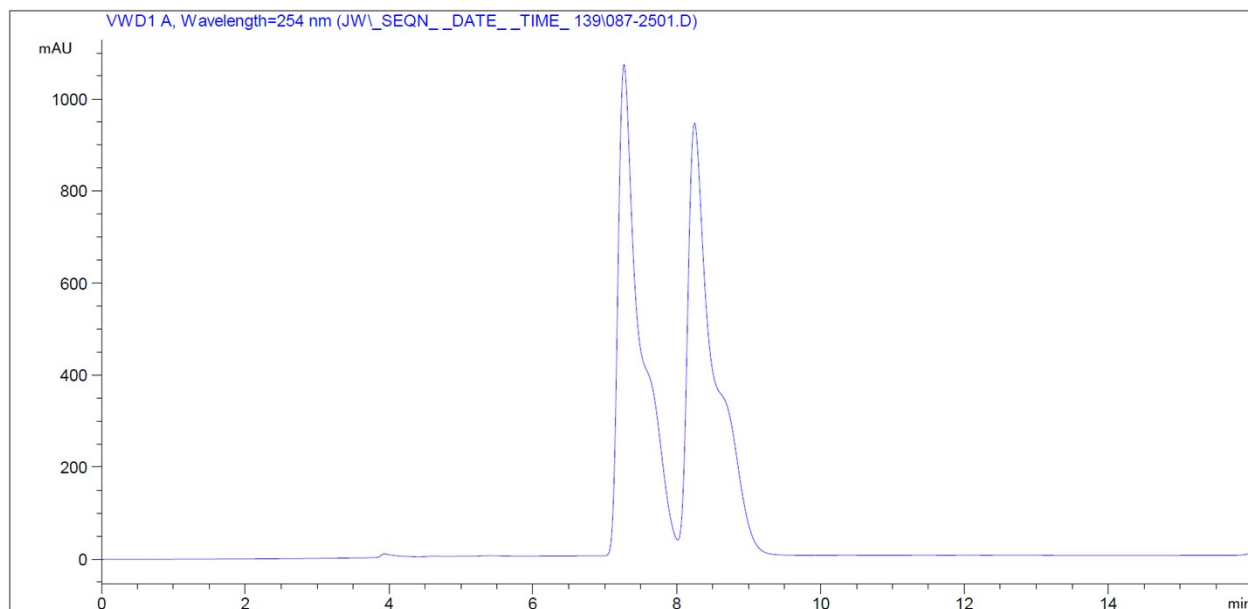

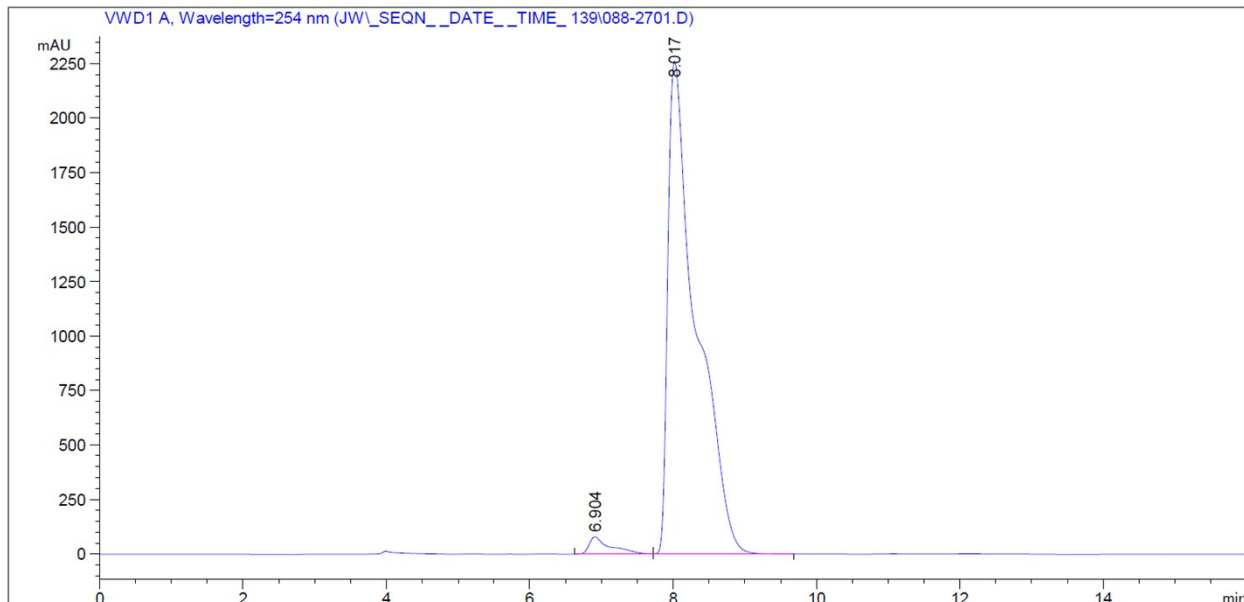

Signal 1: VWD1 A, Wavelength=254 nm

| Peak # | RetTime [min] | Type | Width [min] | Area mAU *s | Height [mAU] | Area %  |
|--------|---------------|------|-------------|-------------|--------------|---------|
| 1      | 6.904         | VV   | 0.2857      | 1660.45337  | 79.54791     | 2.6200  |
| 2      | 8.017         | VB   | 0.3809      | 6.17146e4   | 2262.38330   | 97.3800 |

Totals : 6.33750e4 2341.93121

### 2-undecyl-1,2,3,4-tetrahydroquinoline (4e0)

Yellow oil.  $^1\text{H}$  NMR (400 MHz,  $\text{CDCl}_3$ ):  $\delta$  6.95 (t,  $J = 7.5$  Hz, 2H), 6.58 (td,  $J = 7.4, 1.1$  Hz, 1H), 6.47 (dd,  $J = 9.0, 8.2$  Hz, 1H), 3.74 (br, 1H), 3.27 – 3.18 (m, 1H), 2.80 (ddd,  $J = 16.4, 10.9, 5.5$  Hz, 1H), 2.71 (dt,  $J = 16.3, 4.7$  Hz, 1H), 1.95 (ddt,  $J = 6.9, 5.5, 4.0$  Hz, 1H), 1.65 – 1.53 (m, 1H), 1.43 – 1.51 (m, 2H), 1.34 (dd,  $J = 45.4, 7.5$  Hz, 18H), 0.88 (t,  $J = 7.2$  Hz, 3H).

$^{13}\text{C}$  NMR (400 MHz,  $\text{CDCl}_3$ ):  $\delta$  143.71, 128.19, 125.65, 120.35, 115.84, 112.99, 50.59, 35.71, 30.88, 28.74, 28.59, 28.30, 27.12, 25.41, 24.70, 21.65, 13.05 (d).

Daicel Chiralpak OD-H, hexanes/*i*-PrOH = 98/2, Flow rate = 1.0 ml/min, UV = 254 nm,  $t_1 = 5.2$  min,  $t_2 = 6.2$  min.

$[\alpha]^{22}_{\text{D}} -55.1$  (c 0.5,  $\text{CHCl}_3$ ).

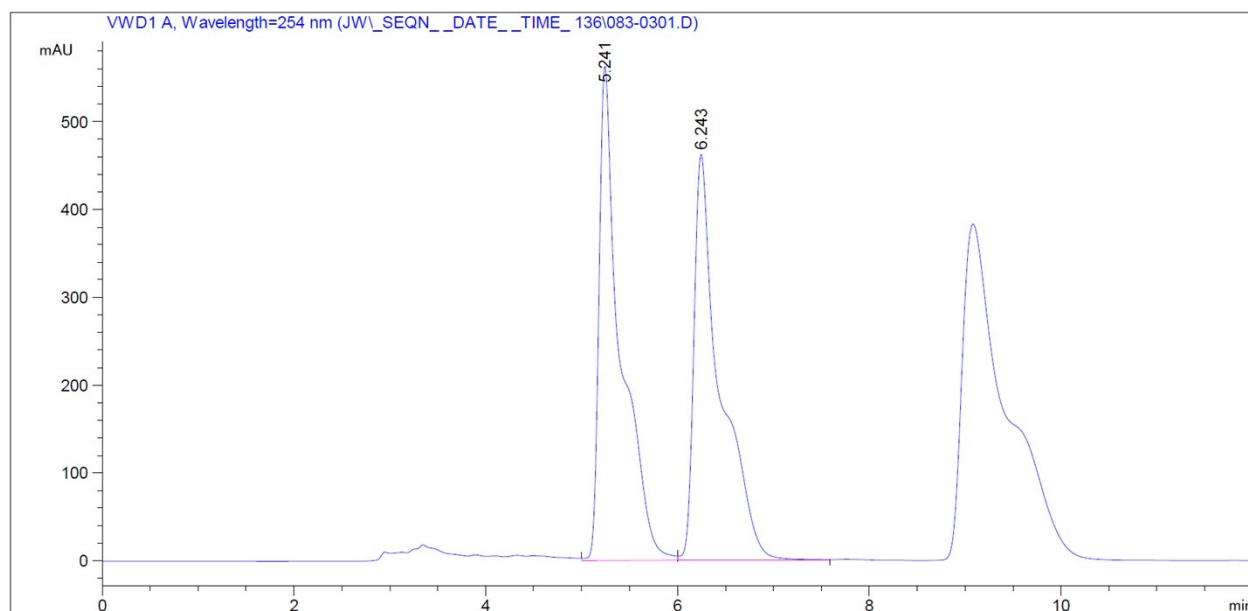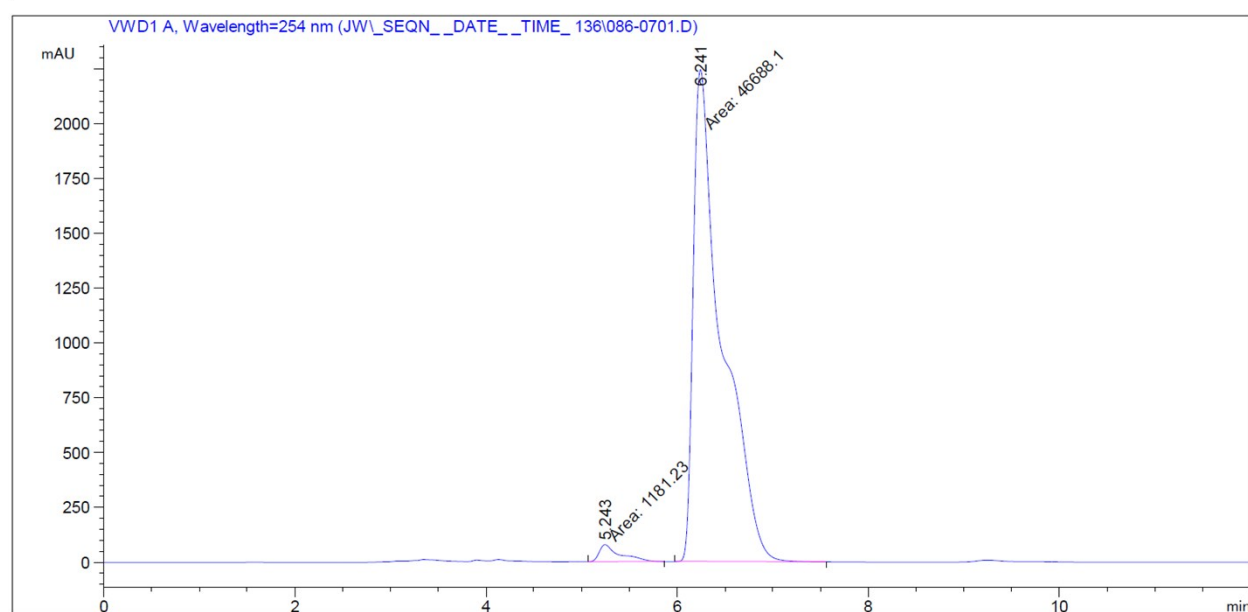

Signal 1: VWD1 A, Wavelength=254 nm

| Peak # | RetTime [min] | Type | Width [min] | Area mAU *s | Height [mAU] | Area %  |
|--------|---------------|------|-------------|-------------|--------------|---------|
| 1      | 5.243         | MM   | 0.2518      | 1181.22571  | 78.17448     | 2.4676  |
| 2      | 6.241         | MM   | 0.3466      | 4.66881e4   | 2244.74536   | 97.5324 |

Totals : 4.78693e4 2322.91985

### 2,6-dimethyl-1,2,3,4-tetrahydroquinoline (4f)

Yellow oil.  $^1\text{H}$  NMR (400 MHz,  $\text{CDCl}_3$ ): 6.77 (d,  $J = 8.4$  Hz, 2H), 6.39 (d,  $J = 8.4$  Hz, 1H), 3.35 (dq,  $J = 12.5, 6.3, 2.8$  Hz, 1H), 2.80 (ddd,  $J = 17.1, 11.5, 5.8$  Hz, 1H), 2.68 (ddd,  $J = 16.4, 5.3, 3.5$  Hz, 1H), 2.19 (s, 3H), 1.94 – 1.86 (m, 1H), 1.56 (dddd,  $J = 12.8, 11.5, 10.0, 5.4$  Hz, 1H), 1.18 (d,  $J = 6.3$  Hz, 3H).

$^{13}\text{C}$  NMR (400 MHz,  $\text{CDCl}_3$ ):  $\delta$  142.46, 129.83, 127.23, 126.26, 121.24, 114.27, 47.35, 30.39, 26.59, 22.59, 20.40.

$[\alpha]_D^{25} -44.8$  (c 0.5,  $\text{CHCl}_3$ ).

Supelco gamma Dex 225 column (30 m  $\times$  0.25 mm  $\times$  0.25  $\mu\text{m}$ ), He 1.0 mL/min, column 120  $^\circ\text{C}$ ,  $t_1 = 47.8$  min,  $t_2 = 48.8$  min.

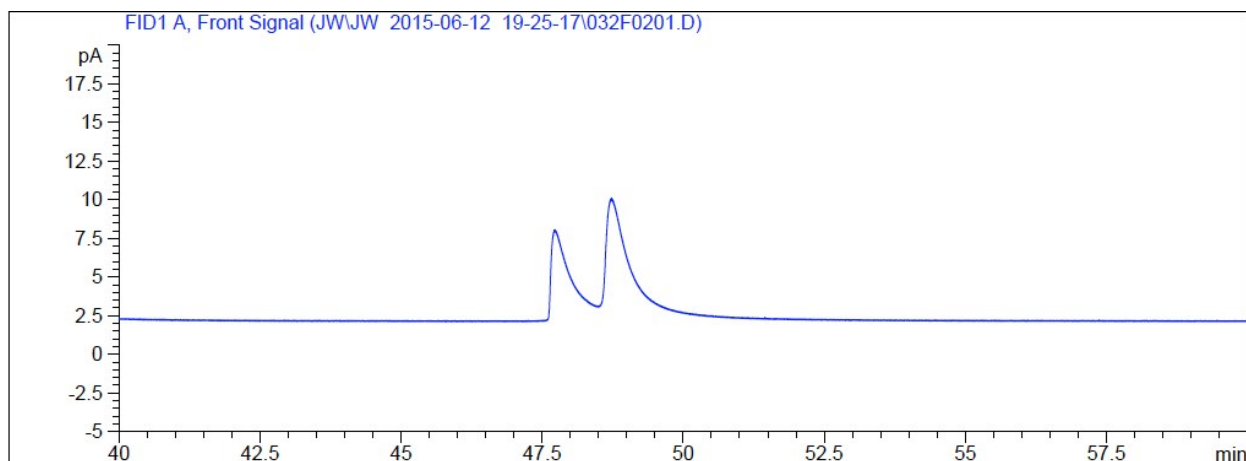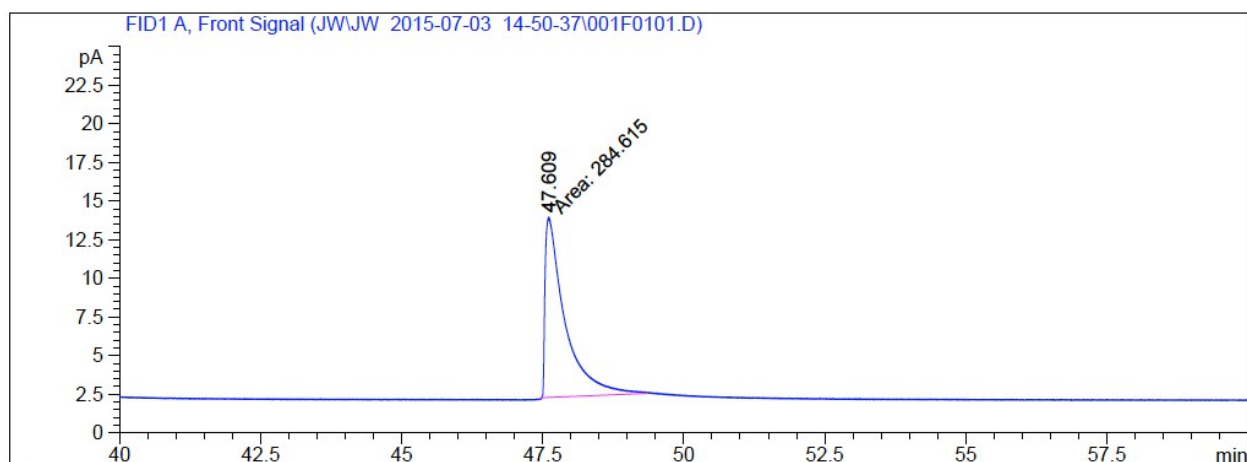



Signal 1: FID1 A, Front Signal

| Peak #   | RetTime [min] | Type | Width [min] | Area [pA*s] | Height [pA] | Area %  |
|----------|---------------|------|-------------|-------------|-------------|---------|
| 1        | 47.609        | MM   | 0.4073      | 284.61505   | 11.64730    | 1.000e2 |
| Totals : |               |      |             | 284.61505   | 11.64730    |         |

=====  
\*\*\* End of Report \*\*\*

### 6-methoxy-2-methyl-1,2,3,4-tetrahydroquinoline (4g)

Yellow oil.  $^1\text{H}$  NMR (400 MHz,  $\text{CDCl}_3$ ):  $\delta$  6.58 (m, 2H), 6.44 (d,  $J = 8.3$  Hz, 1H), 3.72 (s, 3H), 3.37 – 3.27 (m, 1H), 3.17 (br, 1H), 2.83 (ddd,  $J = 17.3, 11.6, 5.9$  Hz, 1H), 2.70 (ddd,  $J = 16.6, 5.4, 3.2$  Hz, 1H), 1.90 (ddt,  $J = 12.6, 5.9, 2.9$  Hz, 1H), 1.56 (dddd,  $J = 12.8, 11.6, 10.2, 5.5$  Hz, 1H), 1.19 (d,  $J = 6.3$  Hz, 3H).

$^{13}\text{C}$  NMR (400 MHz,  $\text{CDCl}_3$ ):  $\delta$  151.92, 138.93, 122.53, 115.33, 114.72, 112.91, 55.83, 47.50, 30.34, 26.91, 22.54.

$[\alpha]^{22}_{\text{D}} -34.7$  (c 0.5,  $\text{CHCl}_3$ ).

Supelco gama Dex 225 column (30 m  $\times$  0.25 mm  $\times$  0.25  $\mu\text{m}$ ), He 1.0 mL/min, column 120  $^\circ\text{C}$ ,  $t_1 = 121.3$  min,  $t_2 = 124.5$  min.

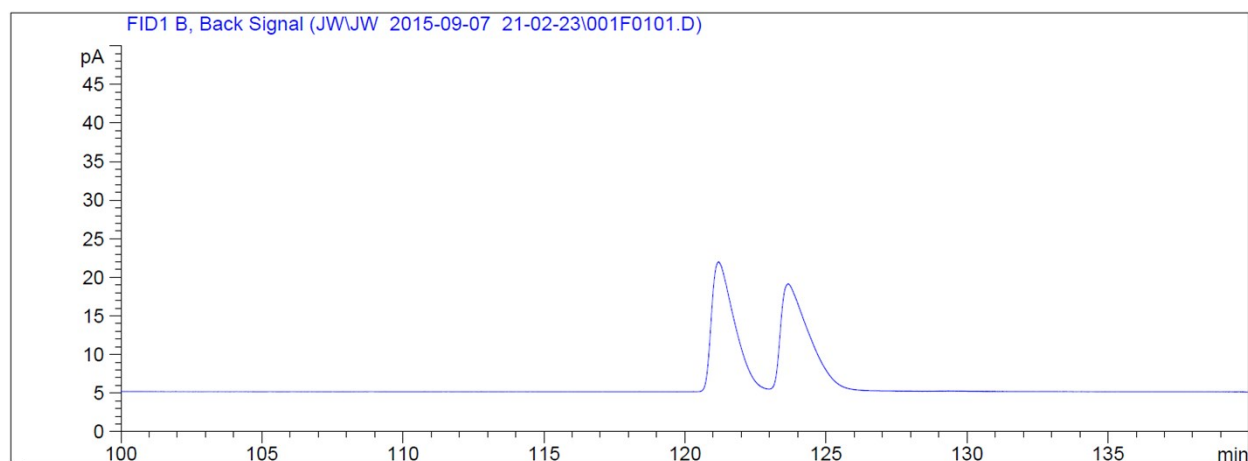

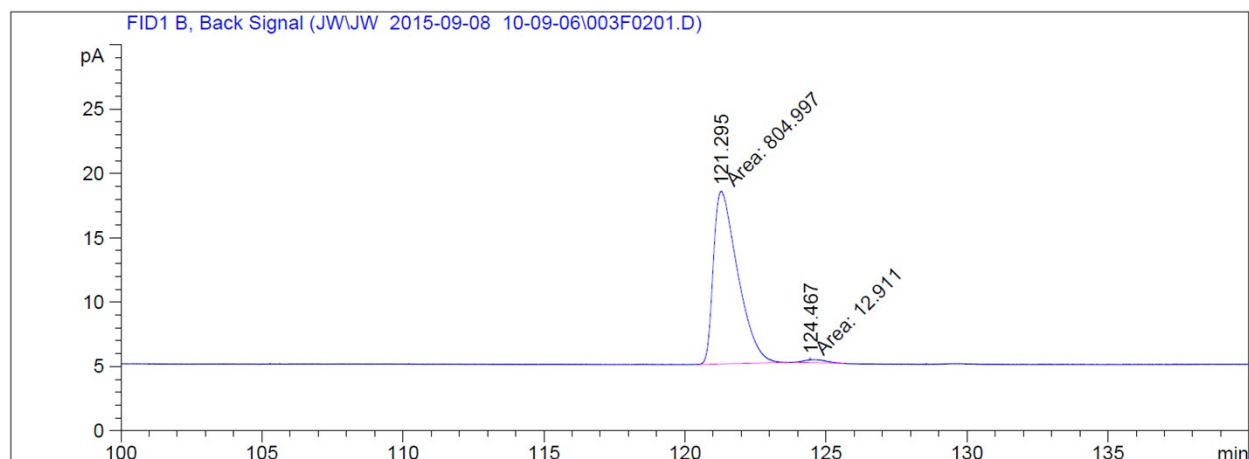

Signal 1: FID1 B, Back Signal

| Peak # | RetTime [min] | Type | Width [min] | Area [pA*s] | Height [pA] | Area %   |
|--------|---------------|------|-------------|-------------|-------------|----------|
| 1      | 121.295       | MM   | 0.9984      | 804.99701   | 13.43821    | 98.42146 |
| 2      | 124.467       | MM   | 0.7978      | 12.91097    | 2.69705e-1  | 1.57854  |

Totals : 817.90798 13.70791

=====  
 \*\*\* End of Report \*\*\*

### 6-chloro-2-methyl-1,2,3,4-tetrahydroquinoline (4h)

Yellow oil. <sup>1</sup>H NMR (400 MHz, CDCl<sub>3</sub>): δ 6.93 – 6.86 (m, 2H), 6.37 (d, *J* = 8.4 Hz, 1H), 3.68 (br, 1H), 3.41 – 3.32 (m, 1H), 2.84 – 2.72 (m, 1H), 2.72 – 2.63 (m, 1H), 1.95 – 1.87 (m, 1H), 1.54 (dddd, *J* = 12.9, 11.4, 9.9, 5.4 Hz, 1H), 1.20 (t, *J* = 5.2 Hz, 3H).

<sup>13</sup>C NMR (400 MHz, CDCl<sub>3</sub>): δ 142.29, 127.78, 125.45, 121.56, 120.25, 113.90, 46.12, 28.67, 25.41, 21.41.

[α]<sub>D</sub><sup>22</sup> -81.4 (c 0.5, CHCl<sub>3</sub>).

Supelco gama Dex 225 column (30 m × 0.25 mm × 0.25 μm), He 1.0 mL/min, column 140 °C, t<sub>1</sub> = 55.9 min, t<sub>2</sub> = 58.0 min.



1H), 2.69 (ddd,  $J = 16.6, 5.3, 3.4$  Hz, 1H), 1.91 (dtd,  $J = 8.8, 5.9, 3.0$  Hz, 1H), 1.55 (dddd,  $J = 12.9, 11.6, 10.1, 5.5$  Hz, 1H), 1.20 (d,  $J = 6.3$  Hz, 3H).

$^{13}\text{C}$  NMR (400 MHz,  $\text{CDCl}_3$ ):  $\delta$  154.51 (d,  $J = 938.4$  Hz), 139.95, 121.44 (d,  $J = 26.4$  Hz), 114.34 (d,  $J = 86.4$  Hz), 113.68 (d,  $J = 30.4$  Hz), 112.12 (d,  $J = 89.6$  Hz), 46.29, 28.87, 25.67, 21.44.

$[\alpha]^{22}_{\text{D}} -63.84$  (c 0.5,  $\text{CHCl}_3$ ).

Supelco gama Dex 225 column (30 m  $\times$  0.25 mm  $\times$  0.25  $\mu\text{m}$ ), He 1.0 mL/min, column 120  $^\circ\text{C}$ ,  $t_1 = 39.0$  min,  $t_2 = 40.7$  min.

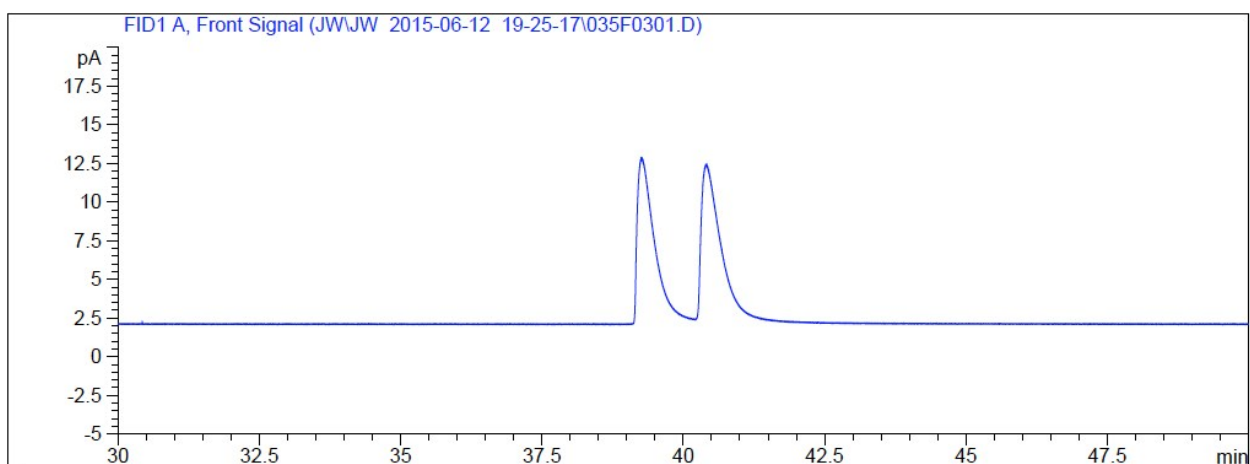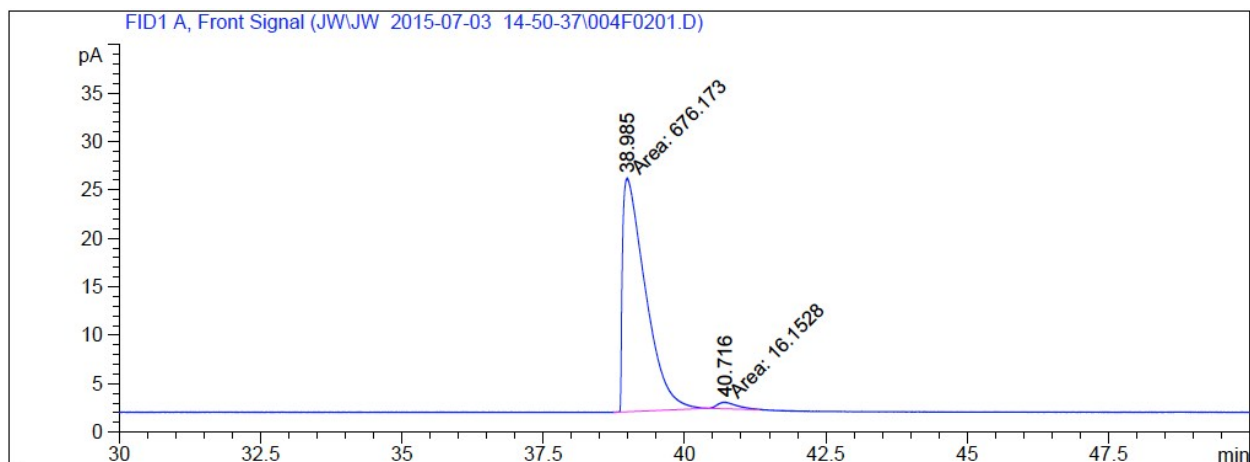



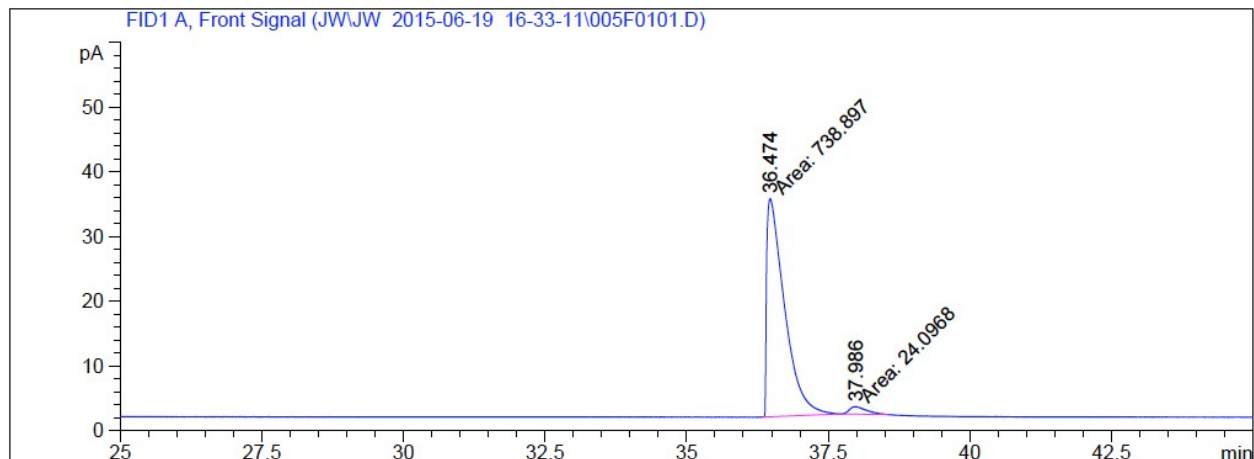

Signal 1: FID1 A, Front Signal

| Peak # | RetTime [min] | Type | Width [min] | Area [pA*s] | Height [pA] | Area %   |
|--------|---------------|------|-------------|-------------|-------------|----------|
| 1      | 36.474        | MM   | 0.3649      | 738.89734   | 33.75223    | 96.84181 |
| 2      | 37.986        | MM   | 0.3442      | 24.09677    | 1.16684     | 3.15819  |

Totals : 762.99411 34.91906

\*\*\* End of Report \*\*\*

### 7-chloro-2-methyl-1,2,3,4-tetrahydroquinoline (4k)

Yellow oil.  $^1\text{H}$  NMR (400 MHz,  $\text{CDCl}_3$ ):  $\delta$  6.84 (d,  $J = 8.0$  Hz, 1H), 6.53 (dd,  $J = 8.0, 2.0$  Hz, 1H), 6.42 (d,  $J = 2.0$  Hz, 1H), 3.72 (br, 1H), 3.38 (dq,  $J = 9.3, 6.3, 3.0$  Hz, 1H), 2.81 – 2.61 (m, 1H), 1.97 – 1.82 (m, 1H), 1.54 (dddd,  $J = 12.9, 11.1, 9.8, 5.5$  Hz, 1H), 1.18 (t,  $J = 10.1$  Hz, 3H).

$^{13}\text{C}$  NMR (400 MHz,  $\text{CDCl}_3$ ):  $\delta$  144.89, 130.89, 129.11, 118.28, 115.55, 112.24, 45.96, 28.75, 25.01, 21.41.

$[\alpha]_D^{22} -73.3$  (c 0.5,  $\text{CHCl}_3$ ).

Supelco gamma Dex 225 column (30 m  $\times$  0.25 mm  $\times$  0.25  $\mu\text{m}$ ), He 1.0 mL/min, column 140  $^\circ\text{C}$ ,  $t_1 = 49.8$  min,  $t_2 = 50.7$  min.

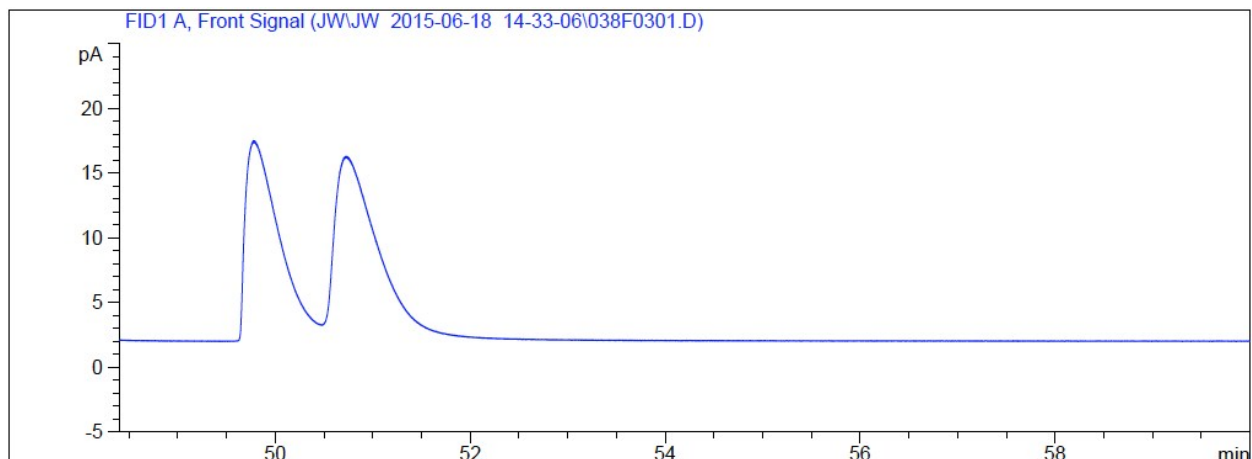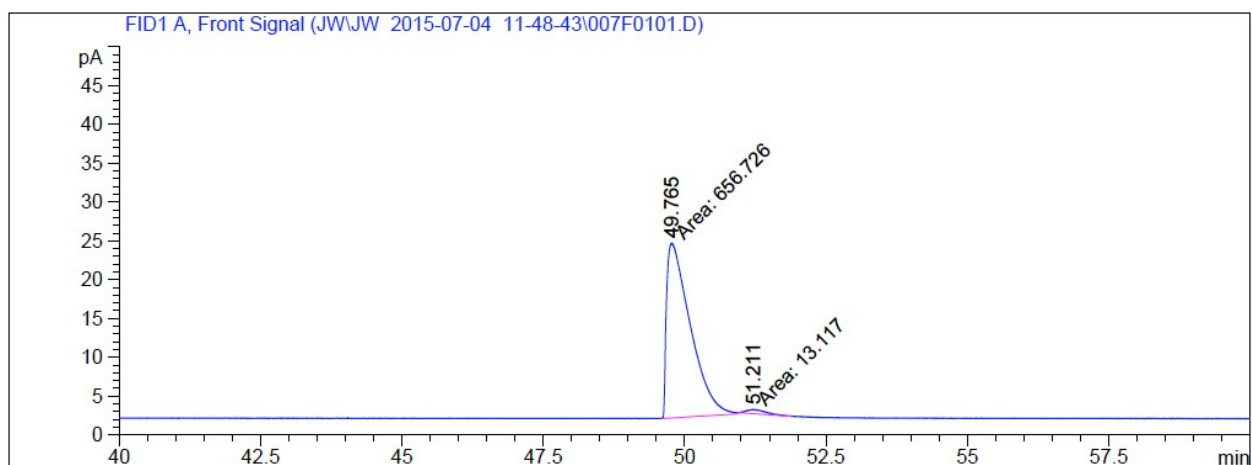

Signal 1: FID1 A, Front Signal

| Peak # | RetTime [min] | Type | Width [min] | Area [pA*s] | Height [pA] | Area %   |
|--------|---------------|------|-------------|-------------|-------------|----------|
| 1      | 49.765        | MM   | 0.4851      | 656.72589   | 22.56477    | 98.04178 |
| 2      | 51.211        | MM   | 0.4062      | 13.11703    | 5.38164e-1  | 1.95822  |

Totals : 669.84292 23.10293

\*\*\* End of Report \*\*\*

### 8-chloro-2-methyl-1,2,3,4-tetrahydroquinoline (4I)

Yellow oil. <sup>1</sup>H NMR (400 MHz, CDCl<sub>3</sub>): δ 7.05 (d, *J* = 7.9 Hz, 1H), 6.86 (dd, *J* = 7.4, 0.9 Hz, 1H), 6.50 (t, *J* = 7.7 Hz, 1H), 4.25 (br, 1H), 3.46 (dq, *J* = 9.4, 6.3, 3.1 Hz, 1H), 2.83

(ddd,  $J = 16.6, 11.2, 5.4$  Hz, 1H), 2.78 – 2.70 (m, 1H), 1.98 – 1.90 (m, 1H), 1.58 (dddd,  $J = 12.9, 11.2, 9.8, 5.3$  Hz, 1H), 1.27 (d,  $J = 6.3$  Hz, 3H).

$^{13}\text{C}$  NMR (400 MHz,  $\text{CDCl}_3$ ):  $\delta$  140.74, 127.43, 126.74, 122.39, 117.84, 116.35, 47.18, 29.64, 26.74, 22.52.

$[\alpha]^{22}_{\text{D}} -68.7$  ( $c$  0.5,  $\text{CHCl}_3$ ).

Supelco gamma Dex 225 column (30 m  $\times$  0.25 mm  $\times$  0.25  $\mu\text{m}$ ), He 1.0 mL/min, column 120  $^\circ\text{C}$ ,  $t_1 = 52.9$  min,  $t_2 = 54.0$  min.

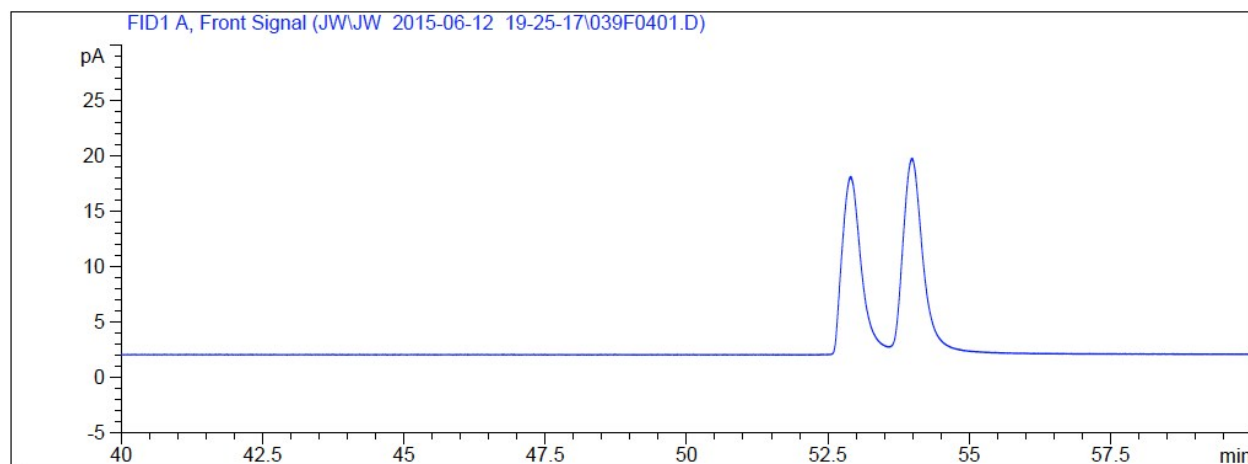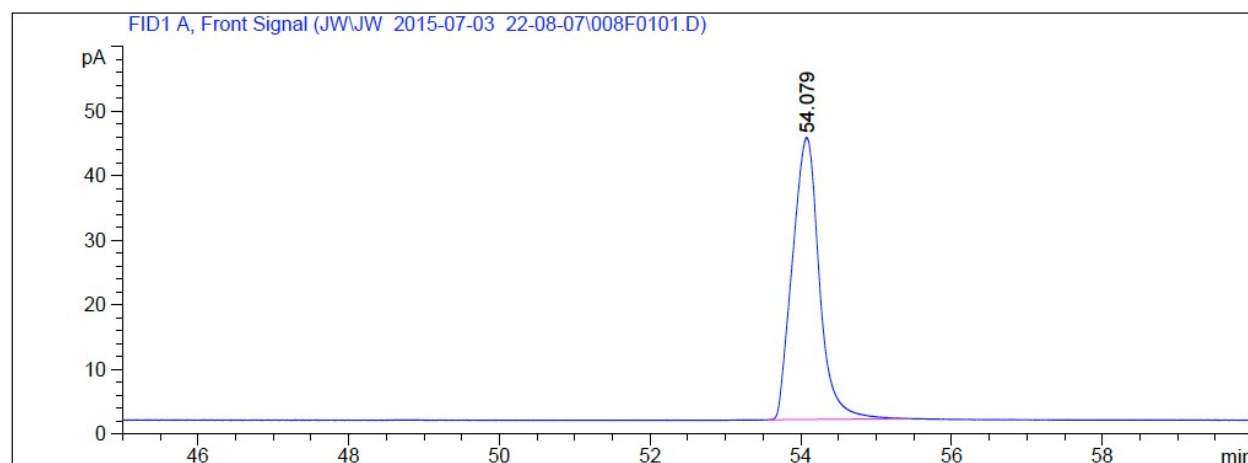



Signal 1: FID1 A, Front Signal

| Peak #   | RetTime [min] | Type | Width [min] | Area [pA*s] | Height [pA] | Area %  |
|----------|---------------|------|-------------|-------------|-------------|---------|
| 1        | 54.079        | BB   | 0.3756      | 1081.64124  | 43.63175    | 1.000e2 |
| Totals : |               |      |             | 1081.64124  | 43.63175    |         |

=====  
\*\*\* End of Report \*\*\*

### **2-(3,4-dimethoxyphenethyl)-1,2,3,4-tetrahydroquinoline (4m)**

Yellow oil.  $^1\text{H}$  NMR (400 MHz,  $\text{CDCl}_3$ )  $\delta$  6.95 (t,  $J = 7.1$  Hz, 2H), 6.83–6.77 (m, 1H), 6.77–6.71 (m, 2H), 6.60 (td,  $J = 7.4, 0.9$  Hz, 1H), 6.44 (dd,  $J = 8.4, 0.9$  Hz, 1H), 3.87 (s, 3H), 3.85 (s, 3H), 3.77 (br, 1H), 3.30 (dtd,  $J = 9.3, 6.3, 3.0$  Hz, 1H), 2.81 (ddd,  $J = 13.1, 9.0, 4.1$  Hz, 1H), 2.73–2.64 (m, 2H), 2.03 – 1.95 (m, 1H), 1.81 (ddd,  $J = 10.2, 7.2, 1.2$  Hz, 2H), 1.72–1.61 (m, 1H).

$^{13}\text{C}$  NMR (400 MHz,  $\text{CDCl}_3$ ):  $\delta$  149.02, 147.37, 144.54, 134.52, 129.27, 126.76, 121.30, 120.17, 117.05, 114.16, 111.74, 111.43, 56.00, 55.90, 51.25, 38.44, 31.86, 28.05, 26.23.  
 $[\alpha]^{22}_{\text{D}} -60.8$  (c 0.5,  $\text{CHCl}_3$ ).

Daicel Chiralpak AS-H, hexanes/*i*-PrOH = 95/5, Flow rate = 0.5 ml/min, UV = 254 nm,  $t_1 = 24.4$  min,  $t_2 = 27.0$  min.

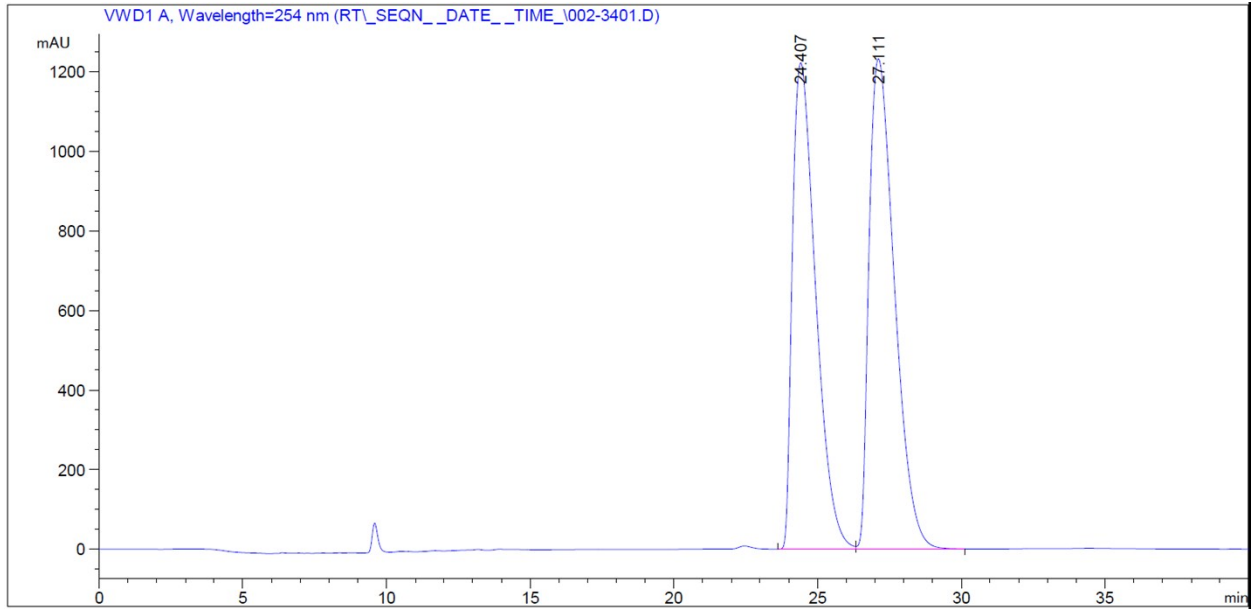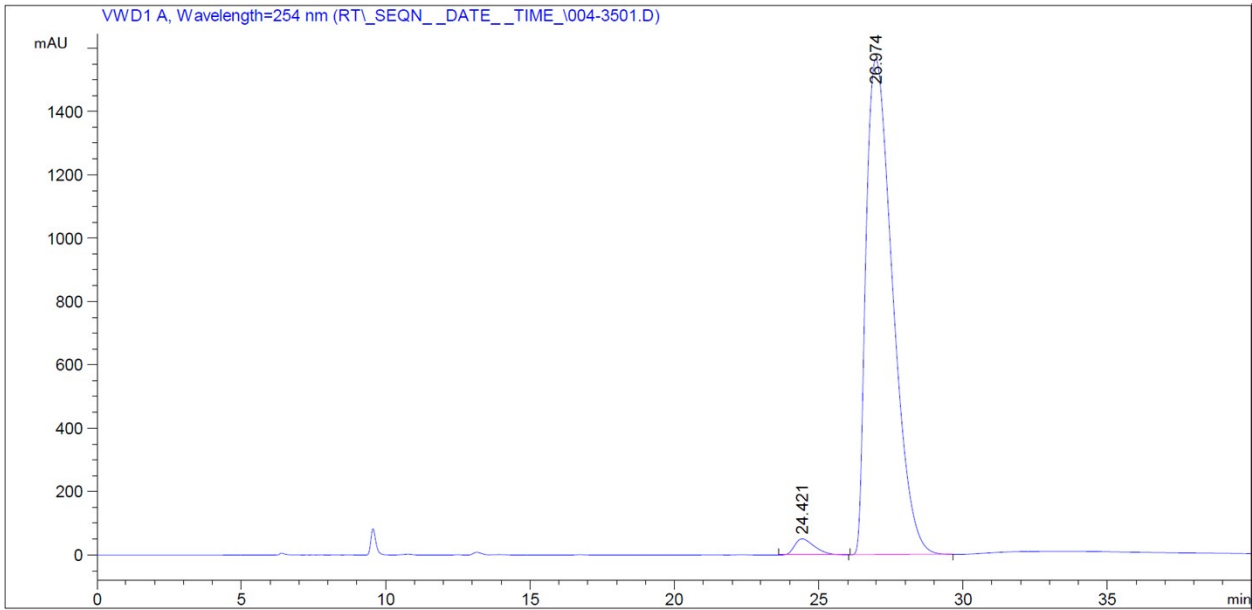

Signal 1: VWD1 A, Wavelength=254 nm

| Peak # | RetTime [min] | Type | Width [min] | Area mAU *s | Height [mAU] | Area %  |
|--------|---------------|------|-------------|-------------|--------------|---------|
| 1      | 24.421        | BB   | 0.7352      | 2461.57397  | 51.10365     | 2.3987  |
| 2      | 26.974        | BB   | 1.0158      | 1.00159e5   | 1565.46924   | 97.6013 |

Totals : 1.02621e5 1616.57289

- [1] a) B. Qian, S. Guo, J. Shao, Q. Zhu, L. Yang, C. Xia and H. Huang, *J. Am. Chem. Soc.* **2010**, *132*, 3650; b) T. Wang, L. Zhuo, Z. Li, F. Chen, Z. Ding, Y. He, Q. Fan, J. Xiang, Z. Yu, and A. Chan, *J. Am. Chem. Soc.* **2011**, *133*, 9878.
- [2] M. Fakhfakha, X. Francka, A. Fourneta, R. Hocquemillera, B. Figadère, *Tetrah. Lett.* **2001**, *42*, 3847.
- [3] K. Kido and Y. Watanabe, *Chem. Pharm. Bull.* **1987**, *35*, 4964-4966.
- [4] J. Mangas-Sanchez, E. Busto, V. Gotor-Fernandez and V. Gotor, *Catal. Sci. Technol.* **2012**, *2*, 1590.
- [5] F. Gou, W. Li, X. Zhang and Y. Liang, *Adv. Synth. Catal.* **2010**, *352*, 2441.
- [6] J. Xie, P. Yan, Q. Zhang, K. Yuan and Q. Zhou, *ACS Catal.* **2012**, *2*, 561.
- [7] D. García, B. Moreno, T. Soler, F. Foubelo, M. Yus, *Tetrahedron Lett.* **2009**, *50*, 4710.

# 9. NMR spectroscopy

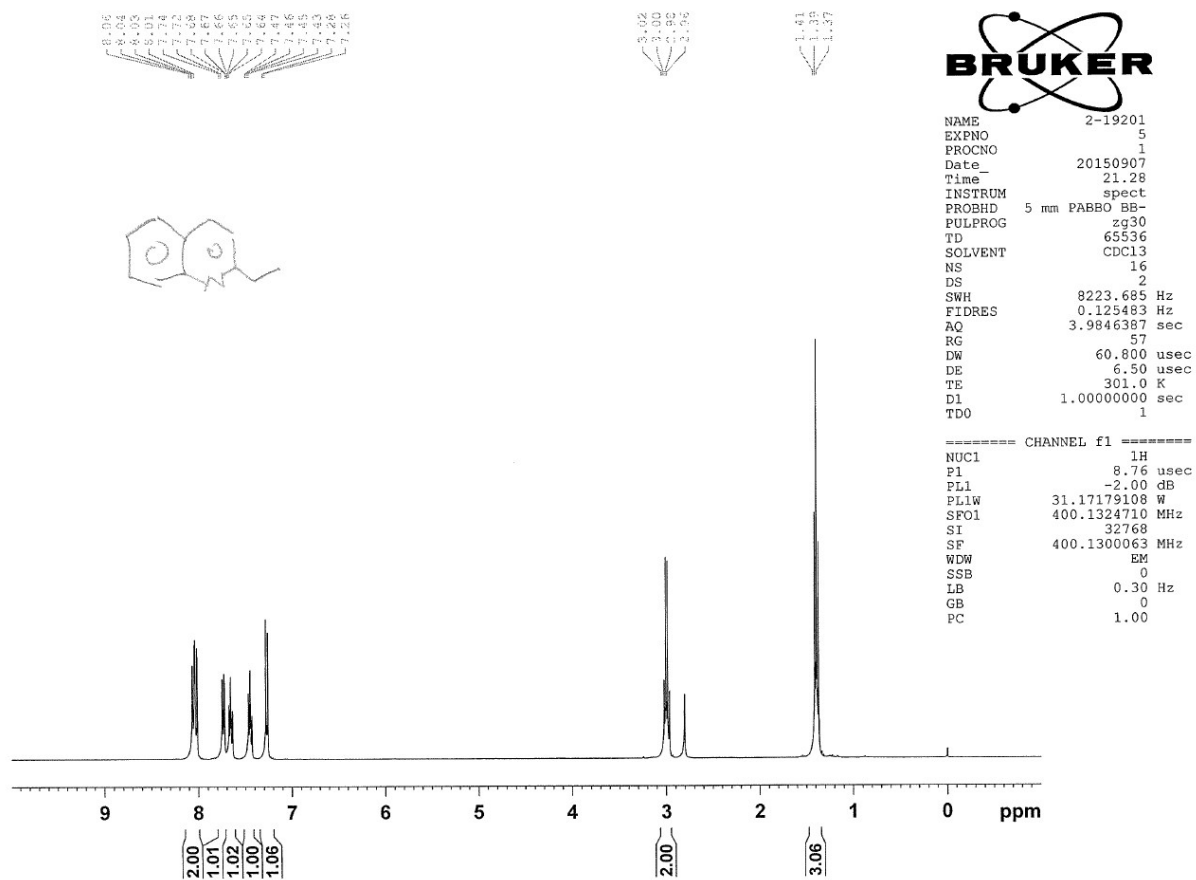

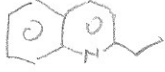

183.97  
 147.87  
 136.31  
 135.30  
 134.45  
 134.73  
 134.63  
 130.61

32.28

13.57

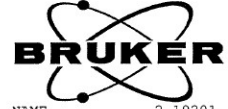

NAME 2-19201  
 EXPNO 4  
 PROCNO 1  
 Date\_ 20150907  
 Time\_ 19.36  
 INSTRUM spect  
 PROBHD 5 mm PABBO BB-  
 PULPROG zgpg30  
 TD 65536  
 SOLVENT CDCl3  
 NS 512  
 DS 2  
 SWH 24038.461 Hz  
 FIDRES 0.366798 Hz  
 AQ 1.3631988 sec  
 RG 2050  
 DW 20.800 usec  
 DE 6.50 usec  
 TE 302.6 K  
 D1 2.0000000 sec  
 D11 0.0300000 sec  
 TD0 1

===== CHANNEL f1 =====  
 NUC1 13C  
 P1 8.50 usec  
 PL1 1.00 dB  
 PL1W 75.02186584 W  
 SFO1 100.6228298 MHz

===== CHANNEL f2 =====  
 CPDPRG2 waltz16  
 NUC2 1H  
 PCPD2 90.00 usec  
 PL2 -2.00 dB  
 PL12 18.23 dB  
 PL13 19.00 dB  
 PL2W 31.17179108 W  
 PL12W 0.29563907 W  
 PL13W 0.24760634 W  
 SFO2 400.1316005 MHz  
 SI 32768  
 SF 100.6127690 MHz  
 WDW EM  
 SSB 0  
 LB 1.00 Hz  
 GB 0  
 PC 1.40

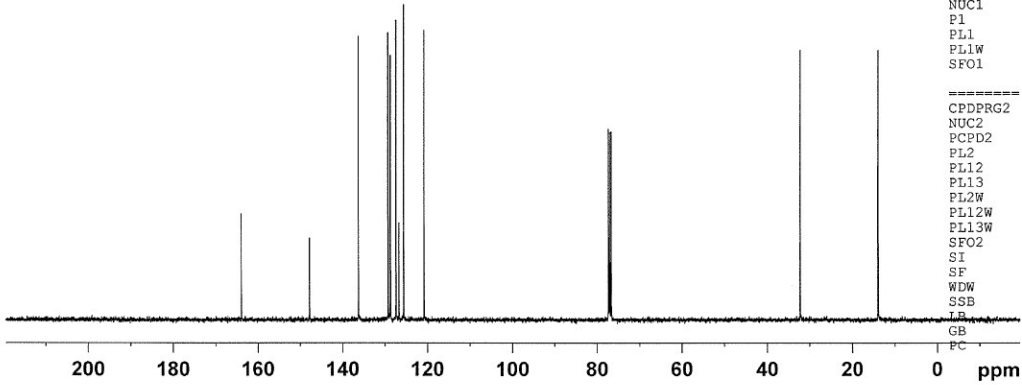

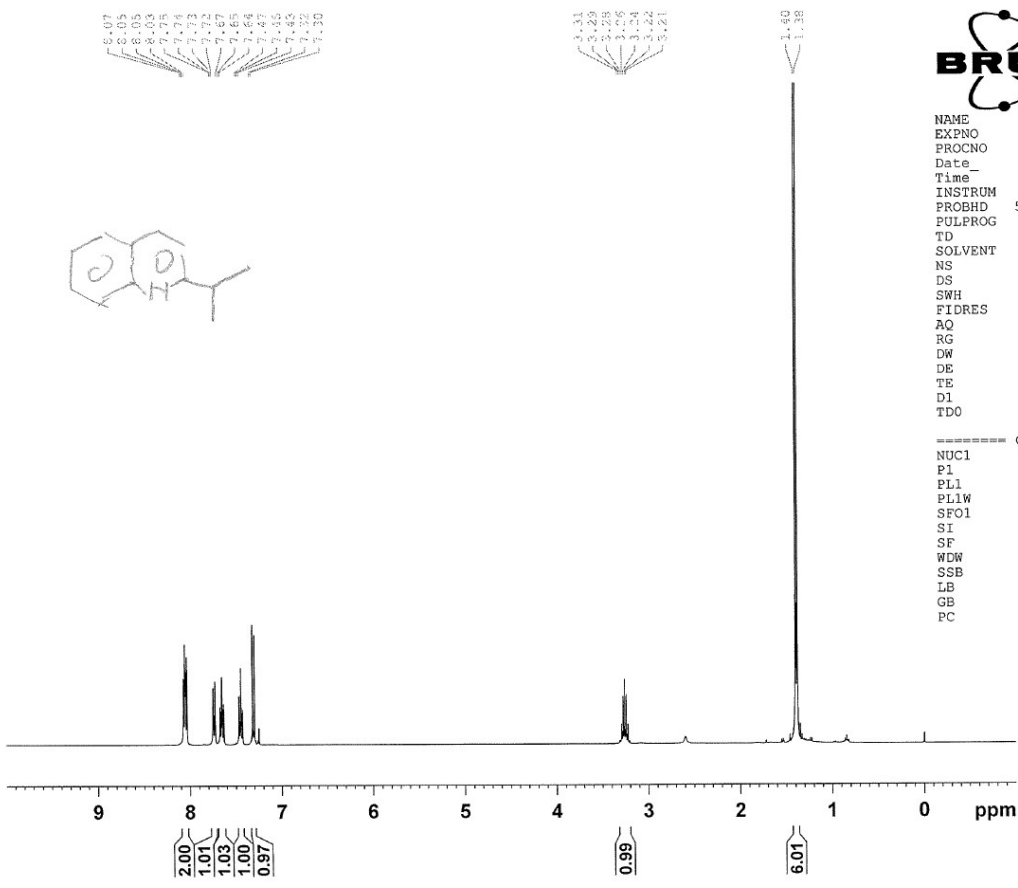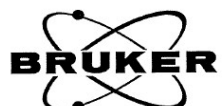

```

NAME      2-192-2
EXPNO     3
PROCNO    1
Date_     20150907
Time      19.42
INSTRUM   spect
PROBHD    5 mm PABBO BB-
PULPROG   zg30
TD        65536
SOLVENT   CDCl3
NS        16
DS        2
SWH       8223.685 Hz
FIDRES    0.125483 Hz
AQ        3.9846387 sec
RG        50.8
DW        60.800 usec
DE        6.50 usec
TE        301.3 K
D1        1.00000000 sec
TD0       1
  
```

```

===== CHANNEL f1 =====
NUC1      1H
P1        8.76 usec
PL1       -2.00 dB
PL1W      31.17179108 W
SFO1      400.1324710 MHz
SI        32768
SF        400.1300140 MHz
WDW       EM
SSB       0
LB        0.30 Hz
GB        0
PC        1.00
  
```

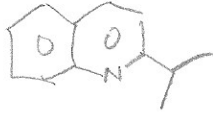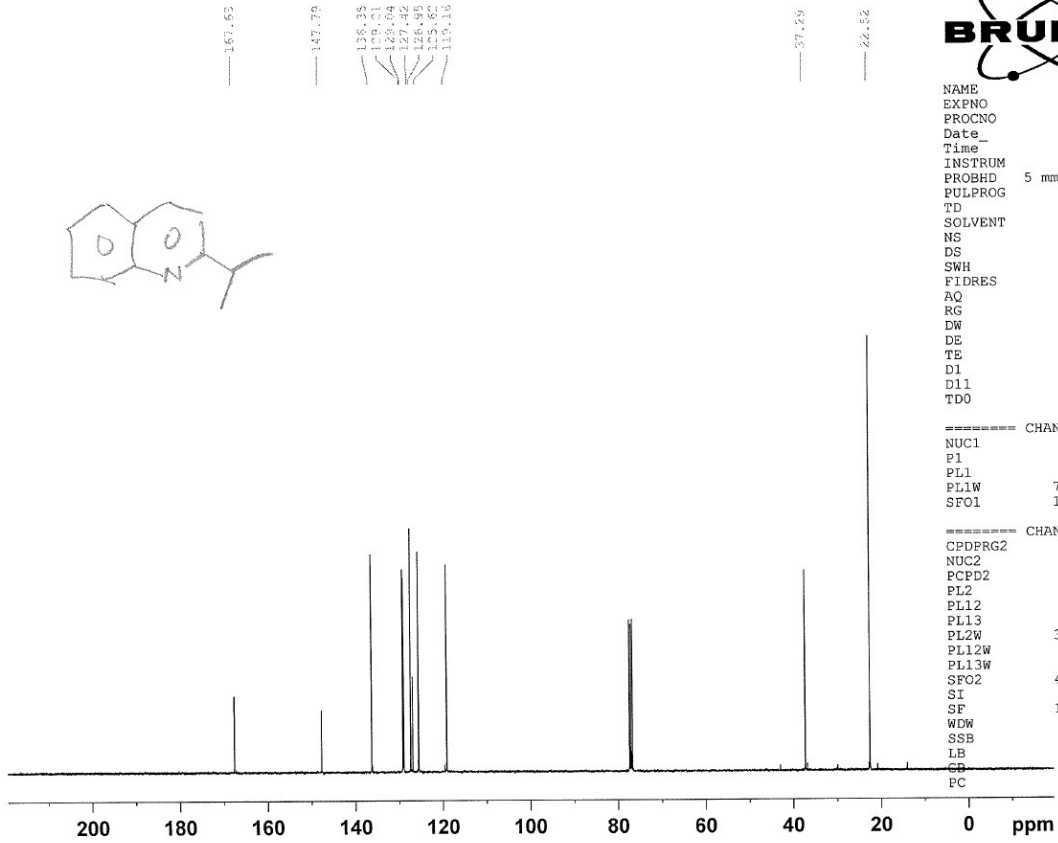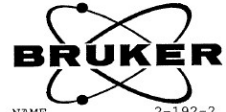

```

NAME      2-192-2
EXPNO     4
PROCNO    1
Date_     20150907
Time      20.13
INSTRUM   spect
PROBHD    5 mm PABBO BB-
PULPROG   zgpg30
TD         65536
SOLVENT   CDC13
NS         512
DS         2
SWH        24038.461 Hz
FIDRES     0.366798 Hz
AQ         1.3631988 sec
RG         2050
DW         20.800 usec
DE         6.50 usec
TE         302.7 K
D1         2.0000000 sec
D11        0.0300000 sec
TDO        1
  
```

```

===== CHANNEL f1 =====
NUC1      13C
P1        8.50 usec
PL1       1.00 dB
PL1W      75.02186584 W
SFO1      100.6228298 MHz
  
```

```

===== CHANNEL f2 =====
CPDPRG2   waltz16
NUC2      1H
PCPD2     90.00 usec
PL2       -2.00 dB
PL12      18.23 dB
PL13      19.00 dB
PL2W      31.17179108 W
PL12W     0.29563907 W
PL13W     0.24760634 W
SFO2      400.1316005 MHz
SI         32768
SF         100.6127690 MHz
WDW        EM
SSB         0
LB         1.00 Hz
GB         0
PC         1.40
  
```

8.05  
8.02  
7.76  
7.74  
7.68  
7.66  
7.64  
7.45  
7.28  
7.25

2.82  
2.84  
2.94  
  
1.85  
1.83  
1.82  
1.80  
1.78  
1.73  
  
0.92  
0.80  
0.82

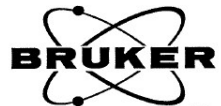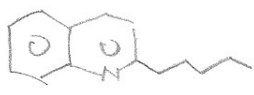

NAME 2-194-1  
EXPNO 2  
PROCNO 1  
Date\_ 20150907  
Time\_ 20.20  
INSTRUM spect  
PROBHD 5 mm PABBO BB-  
PULPROG zg30  
TD 65536  
SOLVENT CDCl3  
NS 16  
DS 2  
SWH 8223.695 Hz  
FIDRES 0.125493 Hz  
AQ 3.9846387 sec  
RG 57  
DW 60.800 usec  
DE 6.50 usec  
TE 301.4 K  
D1 1.00000000 sec  
TDO 1

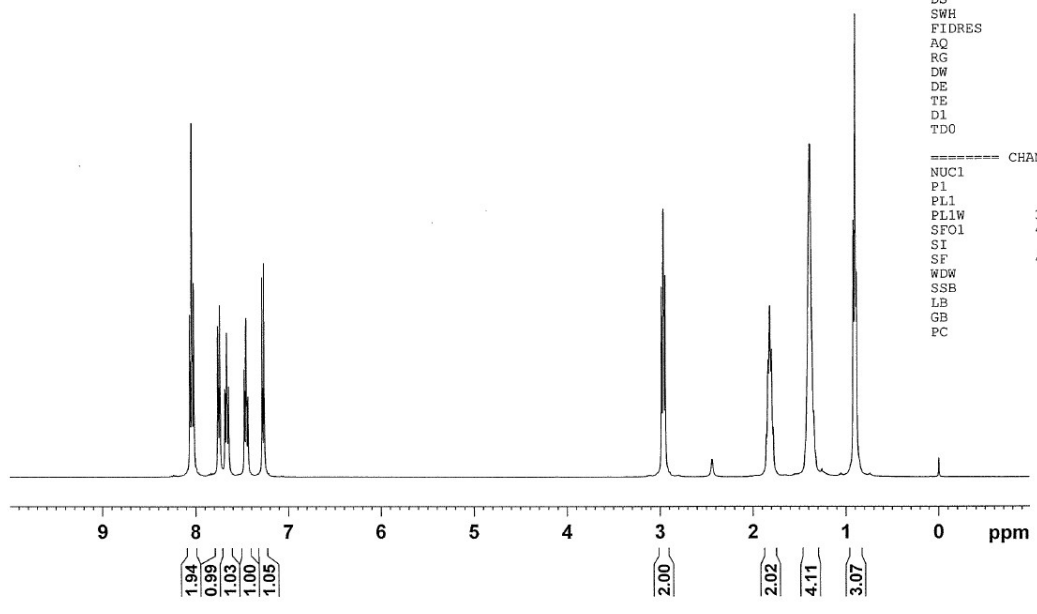

===== CHANNEL f1 =====  
NUC1 1H  
P1 8.76 usec  
PL1 -2.00 dB  
PL1W 31.17179108 W  
SFO1 400.1324710 MHz  
SI 32768  
SF 400.1300100 MHz  
WDW EM  
SSB 0  
LB 0.30 Hz  
GB 0  
PC 1.00



163.10  
147.97  
136.10  
139.20  
128.33  
127.45  
125.72  
125.59  
121.59

39.35  
31.76  
29.71  
27.56  
14.00

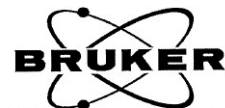

NAME 2-194-1  
EXPNO 3  
PROCNO 1  
Date\_ 20150907  
Time\_ 20.28  
INSTRUM spect  
PROBHD 5 mm PABBO BB-  
PULPROG zgpg30  
TD 65536  
SOLVENT CDCl3  
NS 154  
DS 2  
SWH 24038.461 Hz  
FIDRES 0.366798 Hz  
AQ 1.3631988 sec  
RG 2050  
DW 20.800 usec  
DE 6.50 usec  
TE 302.4 K  
D1 2.00000000 sec  
D11 0.03000000 sec  
TD0 1

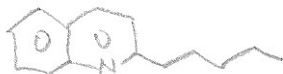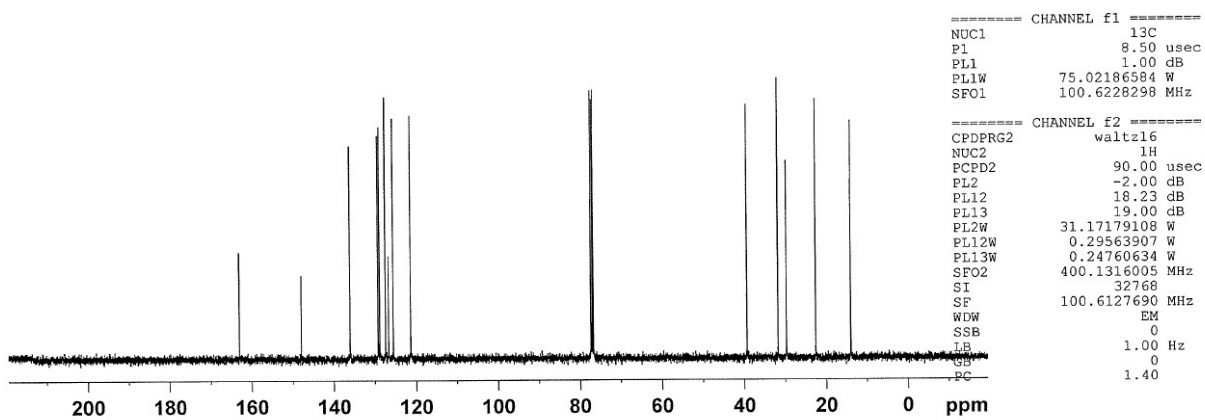

8.05  
7.77  
7.75  
7.65  
7.65  
7.46  
7.45  
7.45  
7.27

2.98  
2.96  
2.94

1.25  
1.23  
1.21  
1.19  
1.17  
1.15  
1.13  
0.87  
0.85

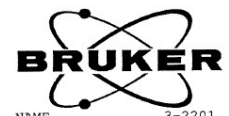

NAME 3-2201  
EXPNO 3  
PROCNO 1  
Date\_ 20150907  
Time\_ 20.37  
INSTRUM spect  
PROBHD 5 mm PABBO BB-  
PULPROG zg30  
TD 65536  
SOLVENT CDC13  
NS 16  
DS 2  
SWH 8223.685 Hz  
FIDRES 0.125483 Hz  
AQ 3.9846387 sec  
RG 57  
DW 60.800 usec  
DE 6.50 usec  
TE 301.3 K  
D1 1.00000000 sec  
TDO 1

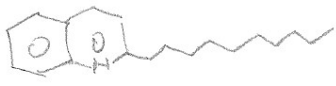

===== CHANNEL f1 =====  
NUC1 1H  
P1 8.76 usec  
PL1 -2.00 dB  
PL1W 31.17179108 W  
SFO1 400.1324710 MHz  
SI 32768  
SF 400.1300103 MHz  
WDW EM  
SSB 0  
LB 0.30 Hz  
GB 0  
PC 1.00

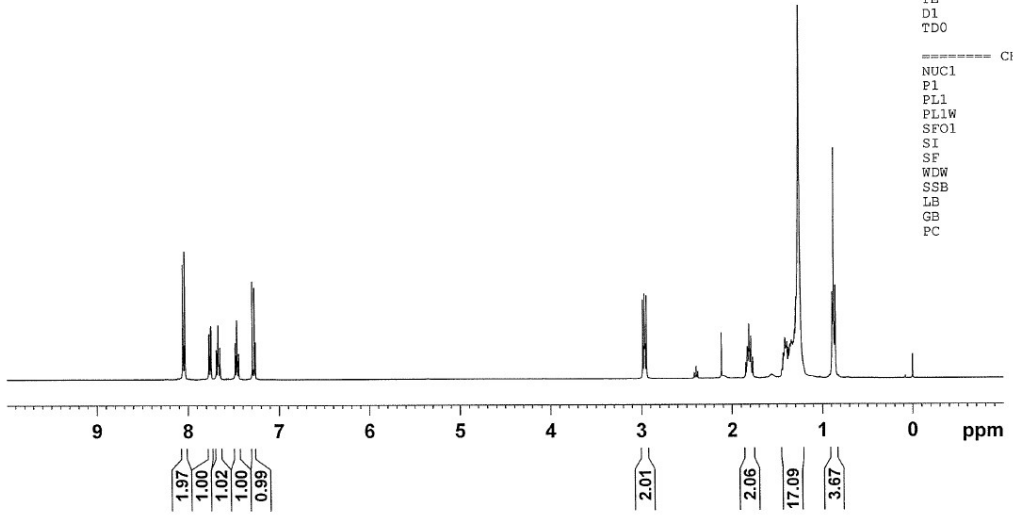

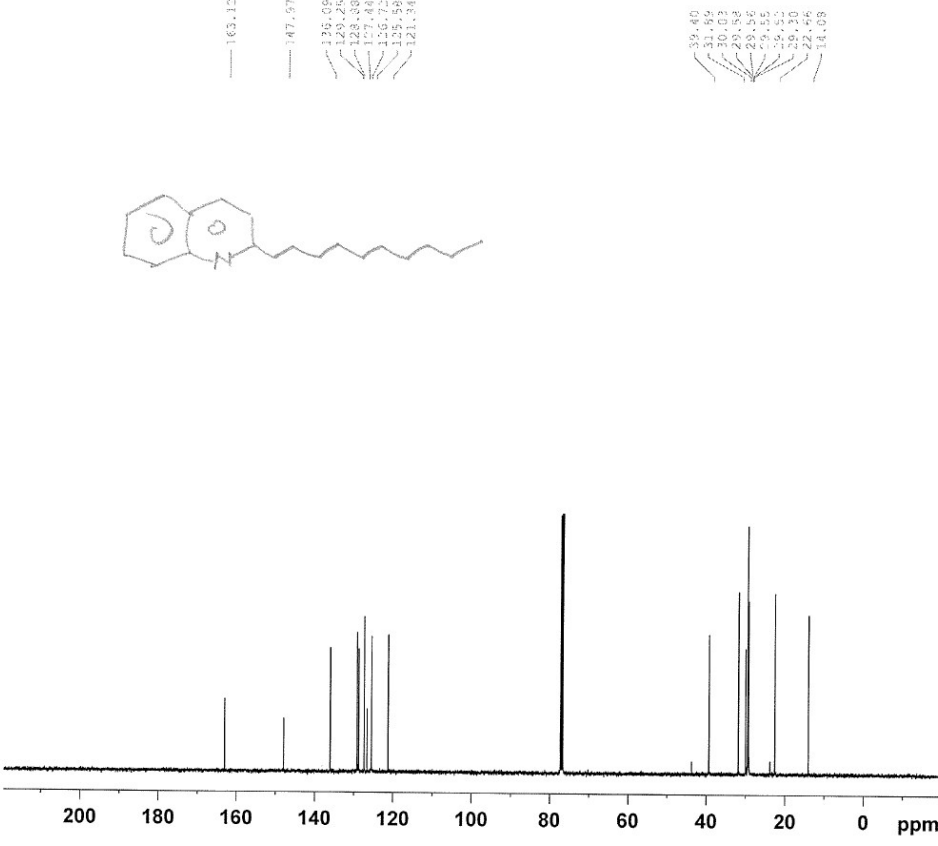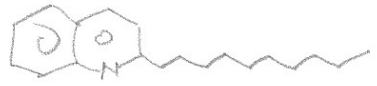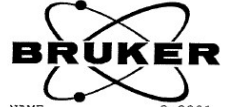

```

NAME      3-2201
EXPNO     4
PROCNO    1
Date_     20150907
Time      20.45
INSTRUM   spect
PROBHD    5 mm PABBO BB-
PULPROG   zgpg30
TD         65536
SOLVENT   CDCl3
NS         512
DS         2
SWH        24038.461 Hz
FIDRES     0.366798 Hz
AQ         1.3631988 sec
RG         2050
DW         20.800 usec
DE         6.50 usec
TE         302.4 K
D1         2.00000000 sec
D11        0.03000000 sec
TDO        1
  
```

```

===== CHANNEL f1 =====
NUC1       13C
P1         8.50 usec
PL1        1.00 dB
PL1W       75.02186584 W
SFO1       100.6228298 MHz
  
```

```

===== CHANNEL f2 =====
CPDPRG2   waltz16
NUC2       1H
PCPD2     90.00 usec
PL2        -2.00 dB
PL12       18.23 dB
PL13       19.00 dB
PL2W       31.17179108 W
PL12W      0.29563907 W
PL13W      0.24760634 W
SFO2       400.1316005 MHz
SI         32768
SF         100.6127690 MHz
WDW        EM
SSB         0
LB         1.00 Hz
GB         0
PC         1.40
  
```

8.105  
8.104  
8.104  
8.102  
7.76  
7.69  
7.67  
7.53  
7.49  
7.43  
7.42  
7.42  
6.78  
6.75

3.98  
3.75  
3.19  
3.17  
3.25  
3.12  
3.10  
3.08

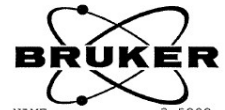

NAME 3-5202  
EXPNO 2  
PROCNO 1  
Date\_ 20150905  
Time 14.53  
INSTRUM spect  
PROBHD 5 mm PABBO BB-  
PULPROG zg30  
TD 65536  
SOLVENT CDC13  
NS 16  
DS 2  
SWH 8223.685 Hz  
FIDRES 0.125483 Hz  
AQ 3.9846387 sec  
RG 128  
DW 60.800 usec  
DE 6.50 usec  
TE 299.8 K  
D1 1.00000000 sec  
TDO 1

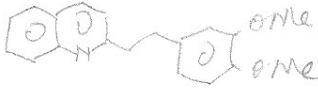

===== CHANNEL f1 =====  
NUC1 1H  
P1 8.76 usec  
PL1 -2.00 dB  
PL1W 31.17179108 W  
SFO1 400.1324710 MHz  
SI 32768  
SF 400.1300090 MHz  
WDW EM  
SSB 0  
LB 0.30 Hz  
GB 0  
PC 1.00

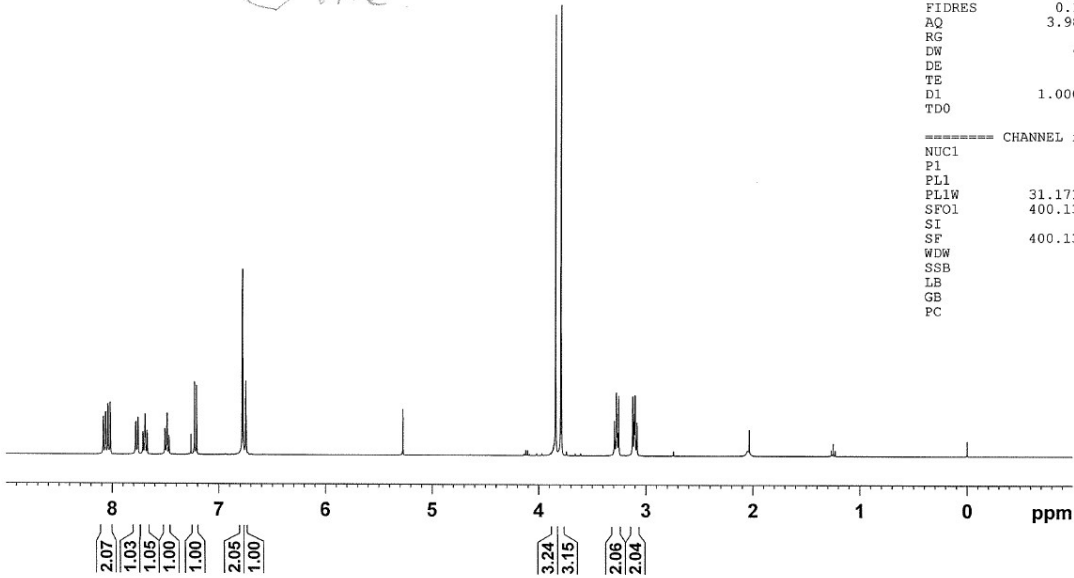

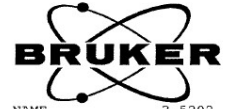

NAME 3-5202  
EXPNO 3  
PROCNO 1  
Date\_ 20150905  
Time 18.56  
INSTRUM spect  
PROBHD 5 mm PABBO BB-  
PULPROG zgpg30  
TD 65536  
SOLVENT CDCl3  
NS 497  
DS 2  
SWH 24038.461 Hz  
FIDRES 0.366798 Hz  
AQ 1.3631988 sec  
RG 2050  
DW 20.800 usec  
DE 6.50 usec  
TE 302.0 K  
D1 2.0000000 sec  
D11 0.0300000 sec  
TDO 1

===== CHANNEL f1 =====  
NUC1 13C  
P1 8.50 usec  
PL1 1.00 dB  
PL1W 75.02186584 W  
SFO1 100.6228298 MHz

===== CHANNEL f2 =====  
CPDPRG2 waltz16  
NUC2 1H  
PCPD2 90.00 usec  
PL2 -2.00 dB  
PL12 18.23 dB  
PL13 19.00 dB  
PL2W 31.17179108 W  
PL12W 0.29563907 W  
PL13W 0.24760634 W  
SFO2 400.1316005 MHz  
SI 32768  
SF 100.6127690 MHz  
WDW EM  
SSB 0  
LB 1.00 Hz  
GB 0  
PC 1.40

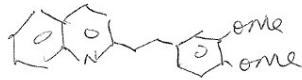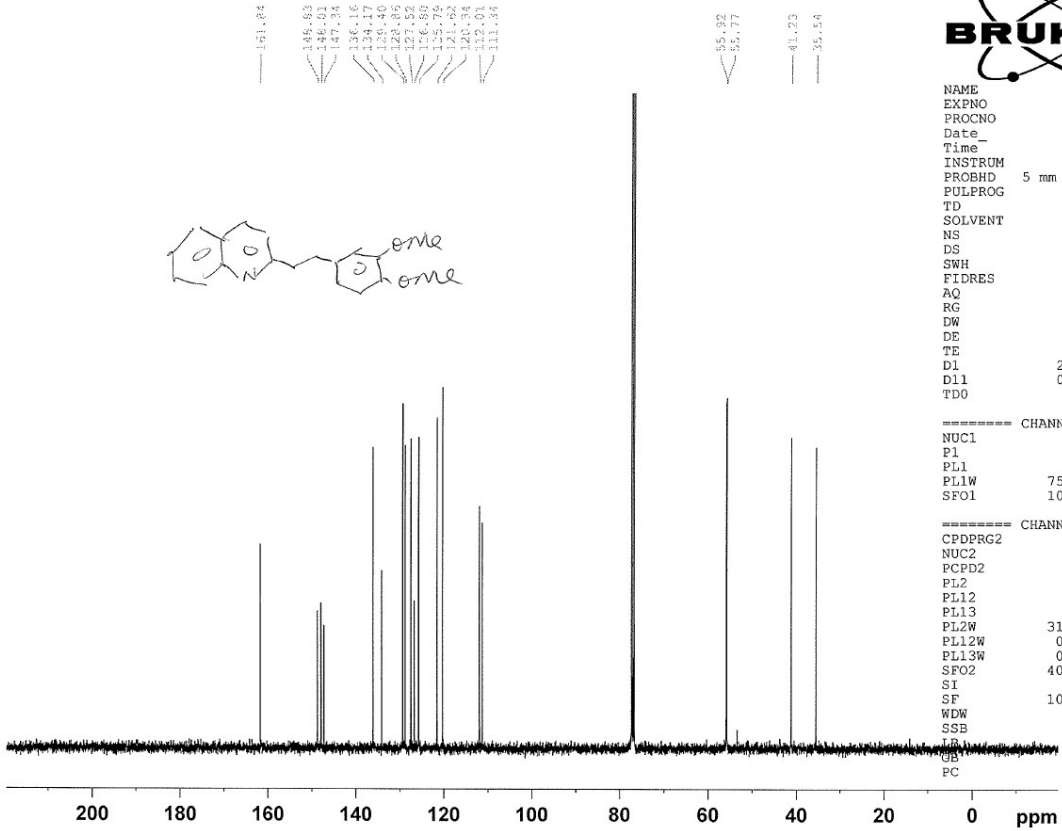

9.06

7.74  
7.59  
7.57  
7.45  
7.47  
7.45  
7.37  
7.36  
7.34  
7.31

3.82  
3.86  
3.84  
3.83

1.42  
1.42  
1.45

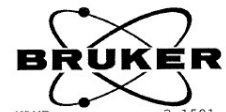

NAME 3-1501  
 EXPNO 4  
 PROCNO 1  
 Date\_ 20150907  
 Time 12.12  
 INSTRUM spect  
 PROBHD 5 mm PABBO BB-  
 PULPROG zg30  
 TD 65536  
 SOLVENT CDCl3  
 NS 16  
 DS 2  
 SWH 8223.685 Hz  
 FIDRES 0.125483 Hz  
 AQ 3.9846387 sec  
 RG 45.2  
 DW 60.800 usec  
 DE 6.50 usec  
 TE 299.3 K  
 D1 1.0000000 sec  
 TD0 1

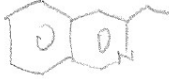

===== CHANNEL f1 =====  
 NUC1 1H  
 P1 8.76 usec  
 PL1 -2.00 dB  
 PL1W 31.17179108 W  
 SFO1 400.1324710 MHz  
 SI 32768  
 SF 400.1300450 MHz  
 WDW EM  
 SSB 0  
 LB 0.30 Hz  
 GB 0  
 PC 1.00

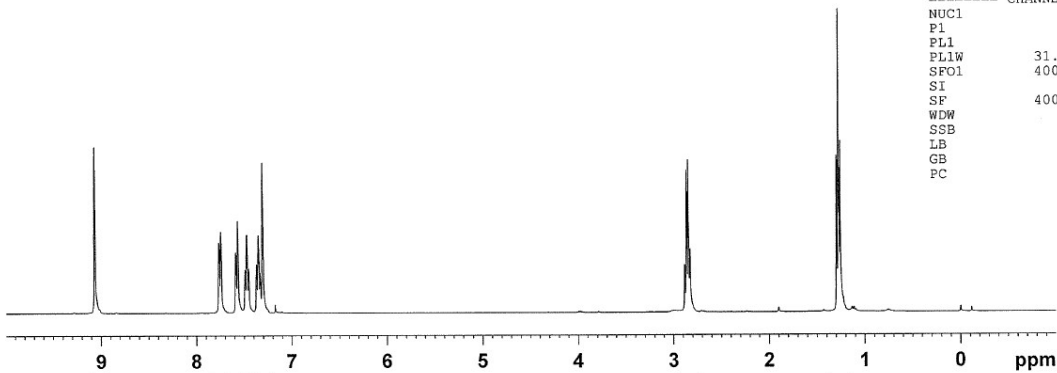

0.96

1.00  
0.99  
1.01  
1.99

2.03

3.01

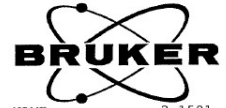

NAME 3-1501  
EXPNO 5  
PROCNO 1  
Date\_ 20150907  
Time\_ 13.11  
INSTRUM spect  
PROBHD 5 mm PABBO BB-  
PULPROG zgpg30  
TD 65536  
SOLVENT CDC13  
NS 1000  
DS 2  
SWH 24038.461 Hz  
FIDRES 0.366798 Hz  
AQ 1.3631988 sec  
RG 2050  
DW 20.800 usec  
DE 6.50 usec  
TE 301.3 K  
D1 2.00000000 sec  
D11 0.03000000 sec  
TD0 1

===== CHANNEL f1 =====  
NUC1 13C  
P1 8.50 usec  
PL1 1.00 dB  
PL1W 75.02186584 W  
SFO1 100.6228298 MHz

===== CHANNEL f2 =====  
CPDPRG2 waltz16  
NUC2 1H  
PCPD2 90.00 usec  
PL2 -2.00 dB  
PL12 18.23 dB  
PL13 19.00 dB  
PL2W 31.17179108 W  
PL12W 0.29563907 W  
PL13W 0.24760634 W  
SFO2 400.1316005 MHz  
SI 32768  
SF 100.6128737 MHz  
WDW EM  
SSB 0  
LB 1.00 Hz  
GB 0  
PC 1.40

----- 155.92  
----- 150.95  
----- 138.85  
----- 138.69  
----- 126.37  
----- 126.02  
----- 125.16  
----- 125.62  
----- 115.93

----- 36.46  
----- 12.02

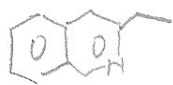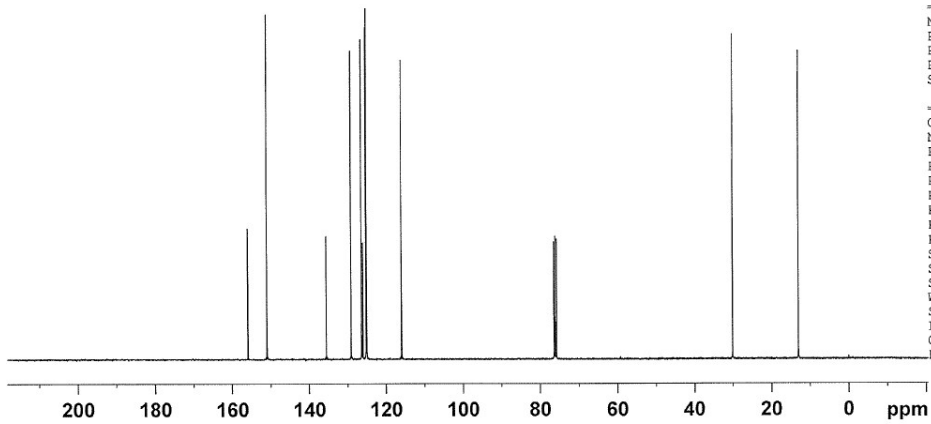

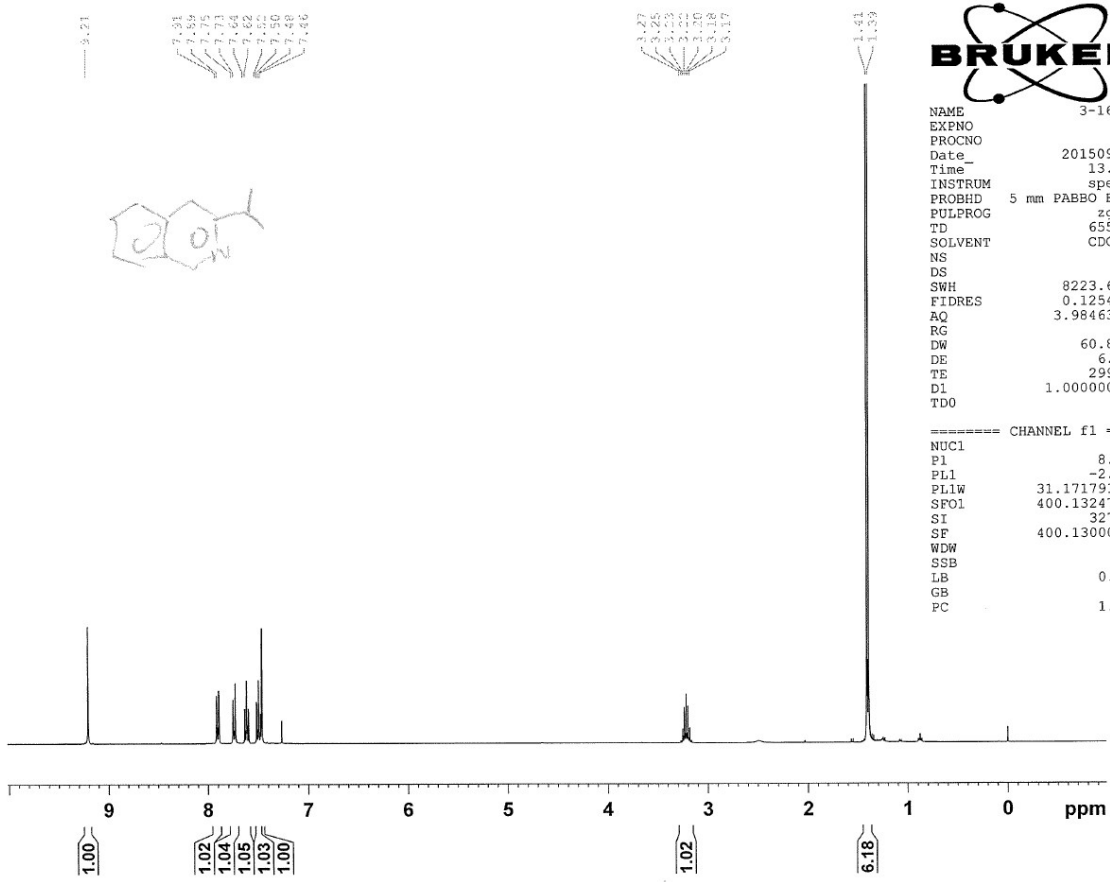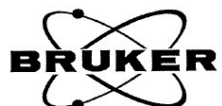

```

NAME      3-1602
EXPNO     4
PROCNO    1
Date_     20150907
Time      13.59
INSTRUM   spect
PROBHD    5 mm PABBO BB-
PULPROG   zg30
TD        65536
SOLVENT   CDCl3
NS        16
DS        2
SWH       8223.685 Hz
FIDRES    0.125483 Hz
AQ        3.9846387 sec
RG        64
DW        60.800 usec
DE        6.50 usec
TE        299.7 K
D1        1.00000000 sec
TDO       1

===== CHANNEL f1 =====
NUC1      1H
P1        8.76 usec
PL1       -2.00 dB
PL1W      31.17179108 W
SFO1      400.1324710 MHz
SI        32768
SF        400.1300080 MHz
WDW       EM
SSB       0
LB        0.30 Hz
GB        0
PC        1.00
  
```



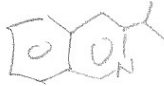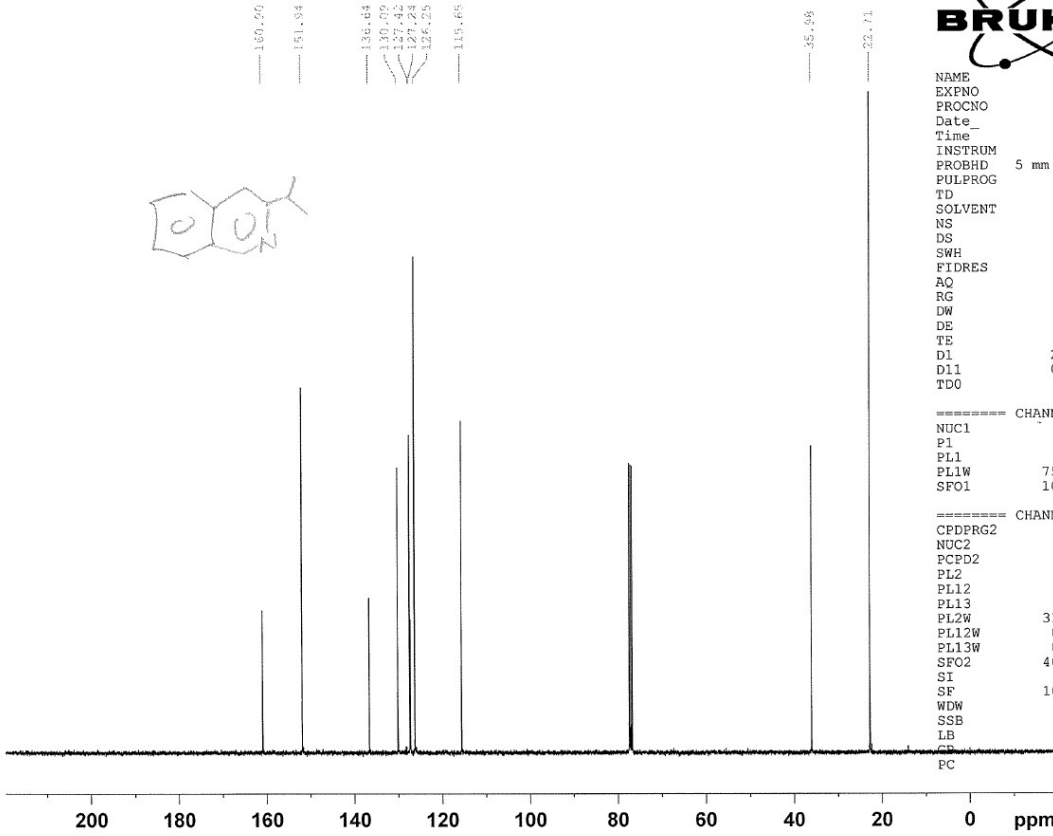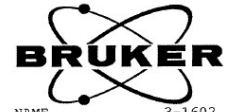

```

NAME 3-1602
EXPNO 5
PROCNO 1
Date_ 20150907
Time 14.19
INSTRUM spect
PROBHD 5 mm PABBO BB-
PULPROG zgpg30
TD 65536
SOLVENT CDC13
NS 512
DS 2
SWH 24038.461 Hz
FIDRES 0.366798 Hz
AQ 1.3631988 sec
RG 2050
DW 20.800 usec
DE 6.50 usec
TE 301.4 K
D1 2.0000000 sec
D11 0.0300000 sec
TD0 1

===== CHANNEL f1 =====
NUC1 13C
P1 8.50 usec
PL1 1.00 dB
PL1W 75.02186584 W
SFO1 100.6228298 MHz

===== CHANNEL f2 =====
CPDPRG2 waltz16
NUC2 1H
PCPD2 90.00 usec
PL2 -2.00 dB
PL12 18.23 dB
PL13 19.00 dB
PL2W 31.17179108 W
PL12W 0.29563907 W
PL13W 0.24760634 W
SFO2 400.1316005 MHz
SI 32768
SF 100.6127690 MHz
WDW EM
SSB 0
LB 1.00 Hz
GB 0
PC 1.40

```

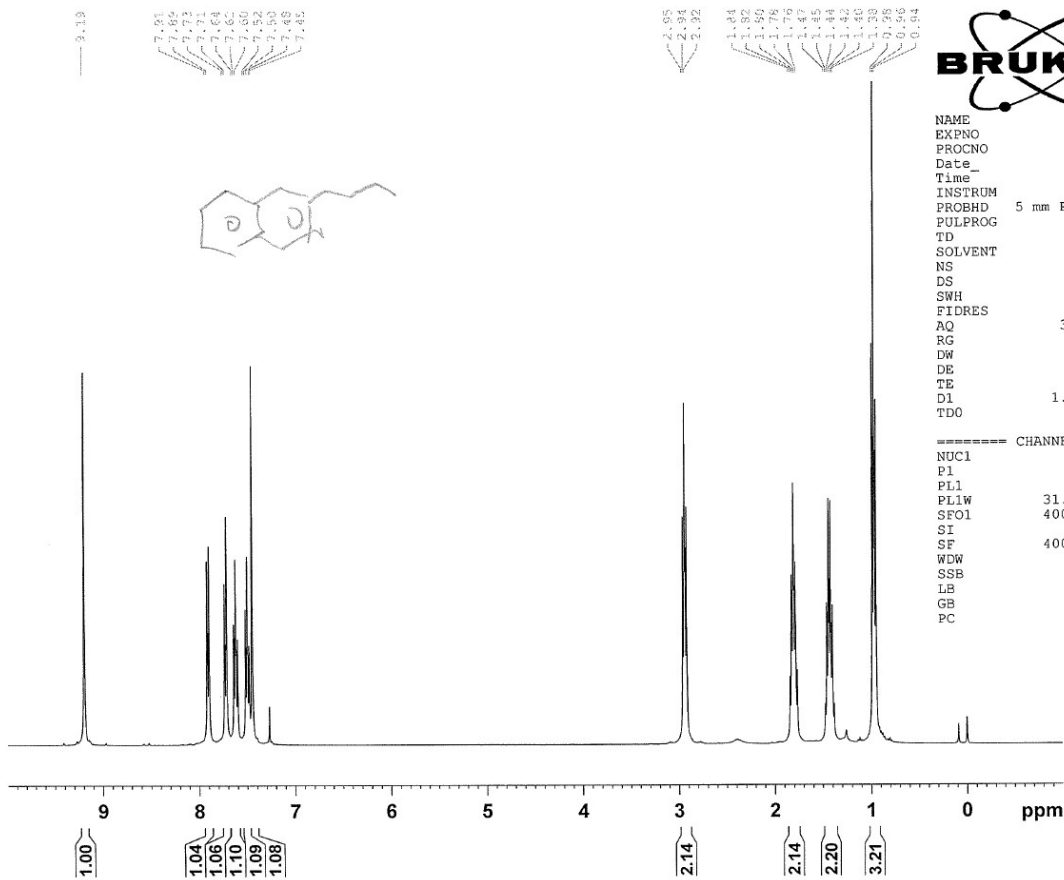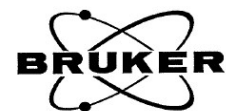

NAME 3-1902  
 EXPNO 1  
 PROCNO 1  
 Date\_ 20150907  
 Time 14.37  
 INSTRUM spect  
 PROBHD 5 mm PABBO BB-  
 PULPROG zg30  
 TD 65536  
 SOLVENT CDCl3  
 NS 16  
 DS 2  
 SWH 8223.685 Hz  
 FIDRES 0.125483 Hz  
 AQ 3.9846387 sec  
 RG 64  
 DW 60.800 usec  
 DE 6.50 usec  
 TE 300.2 K  
 D1 1.00000000 sec  
 TDO 1

===== CHANNEL f1 =====  
 NUC1 1H  
 P1 8.76 usec  
 PL1 -2.00 dB  
 PL1W 31.17179108 W  
 SFO1 400.1324710 MHz  
 SI 32768  
 SF 400.1300076 MHz  
 WDW EM  
 SSB 0  
 LB 0.30 Hz  
 GB 0  
 PC 1.00

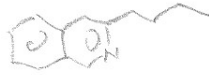

155.85  
152.04  
136.54  
130.14  
127.46  
127.07  
126.22  
125.05  
117.97

37.84  
32.14  
25.50  
13.97

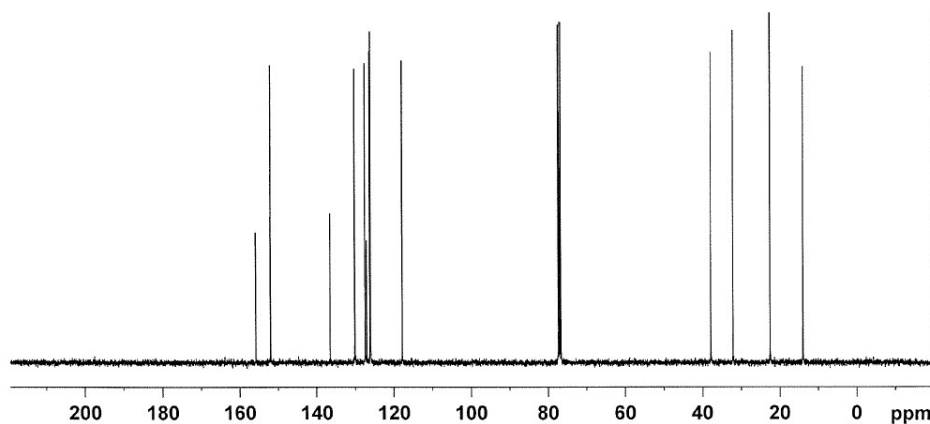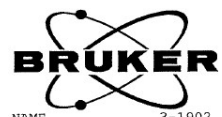

NAME 3-1902  
EXPNO 2  
PROCNO 1  
Date\_ 20150907  
Time\_ 15.08  
INSTRUM spect  
PROBHD 5 mm PABBO BB-  
PULPROG zgpg30  
TD 65536  
SOLVENT CDC13  
NS 512  
DS 2  
SWH 24038.461 Hz  
FIDRES 0.366798 Hz  
AQ 1.3631988 sec  
RG 2050  
DW 20.800 usec  
DE 6.50 usec  
TE 301.7 K  
D1 2.00000000 sec  
D11 0.03000000 sec  
TD0 1

----- CHANNEL f1 -----  
NUC1 13C  
P1 8.50 usec  
PL1 1.00 dB  
PL1W 75.02186584 W  
SFO1 100.6228298 MHz

----- CHANNEL f2 -----  
CFDPRG2 waltz16  
NUC2 1H  
PCPD2 90.00 usec  
PL2 -2.00 dB  
PL12 18.23 dB  
PL13 19.00 dB  
PL2W 31.17179108 W  
PL12W 0.29563907 W  
PL13W 0.24760634 W  
SFO2 400.1316005 MHz  
SI 32768  
SF 100.6127690 MHz  
WDW EM  
SSB 0  
LB 1.00 Hz  
GB 0  
PC 1.40

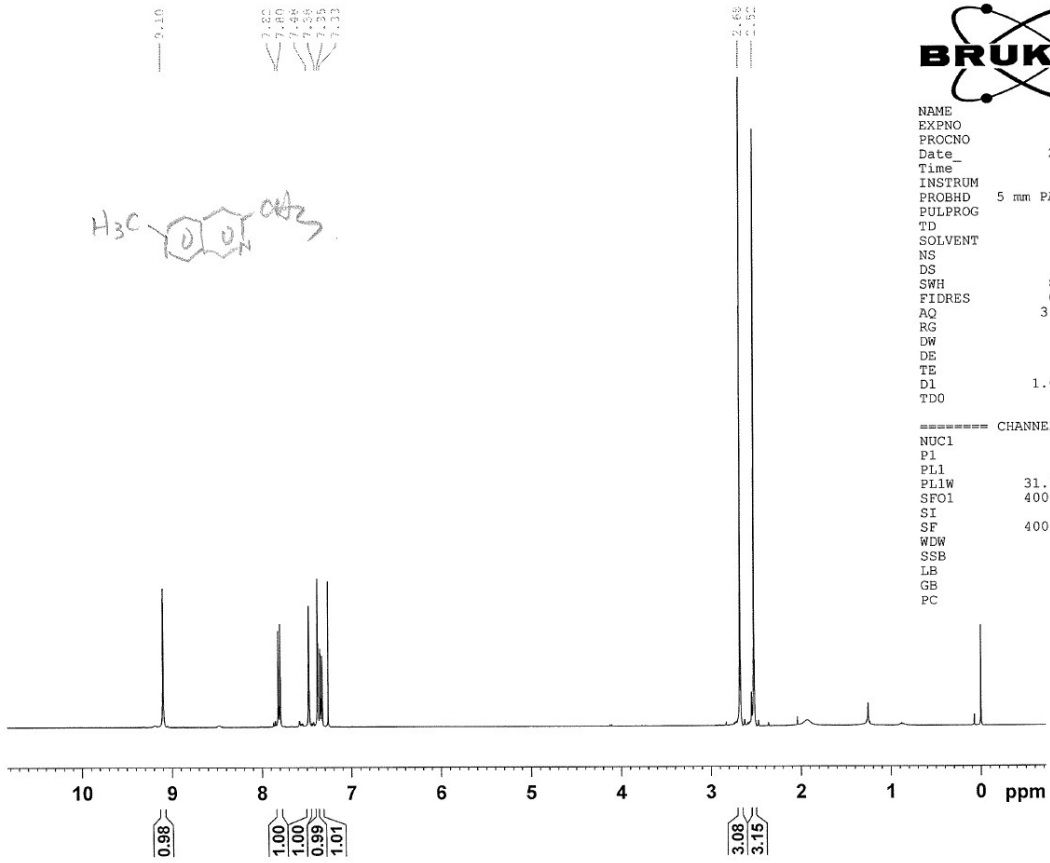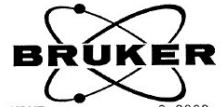

```

NAME      3-2802
EXPNO     2
PROCNO    1
Date_     20150907
Time_     16.28
INSTRUM   spect
PROBHD    5 mm PABBO BB-
PULPROG   zg30
TD        65536
SOLVENT   CDCl3
NS        32
DS        2
SWH       8223.685 Hz
FIDRES    0.125483 Hz
AQ        3.9846387 sec
RG        362
DW        60.800 usec
DE        6.50 usec
TE        300.7 K
D1        1.00000000 sec
TDO       1

```

```

===== CHANNEL f1 =====
NUC1      1H
P1        8.76 usec
PL1       -2.00 dB
PL1W      31.17179108 W
SFO1     400.1324710 MHz
SI        32768
SF        400.1300097 MHz
WDW       EM
SSB       0
LB        0.30 Hz
GB        0
PC        1.00

```

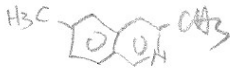

151.97  
151.91  
140.85  
136.92  
129.88  
127.28  
124.80  
117.95

24.18  
22.05

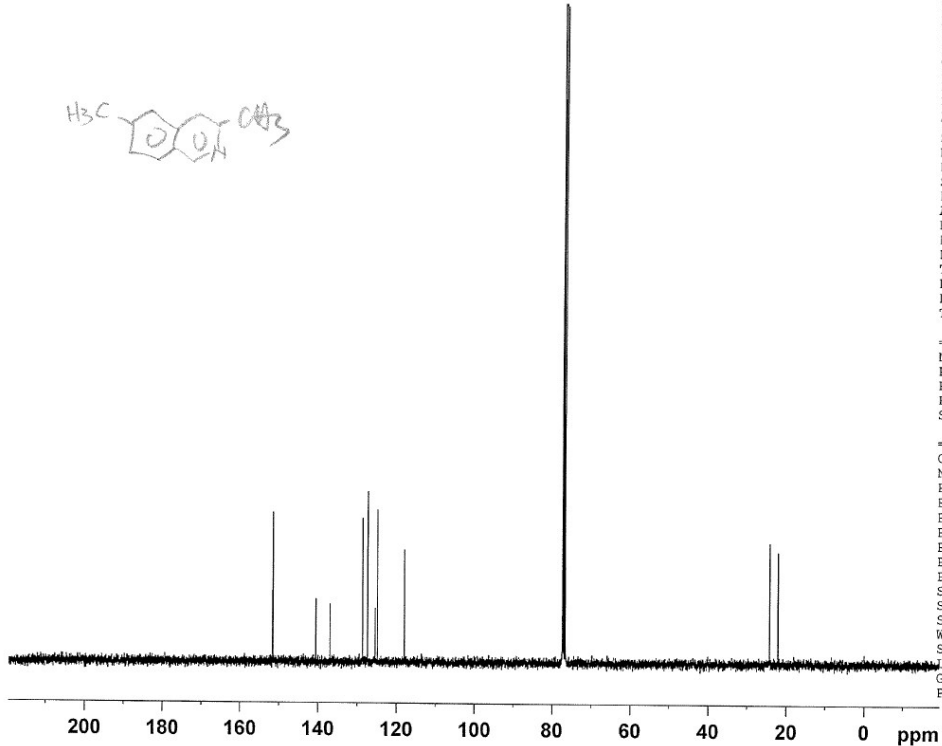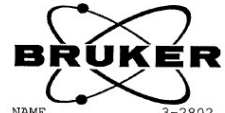

NAME 3-2802  
 EXPNO 3  
 PROCNO 1  
 Date\_ 20150907  
 Time\_ 16.53  
 INSTRUM spect  
 PROBHD 5 mm PABBO BB-  
 PULPROG zgpg30  
 TD 65536  
 SOLVENT CDCl3  
 NS 594  
 DS 2  
 SWH 24038.461 Hz  
 FIDRES 0.366798 Hz  
 AQ 1.3631988 sec  
 RG 2050  
 DW 20.800 usec  
 DE 6.50 usec  
 TE 302.1 K  
 D1 2.0000000 sec  
 D11 0.0300000 sec  
 TD0 1

==== CHANNEL f1 =====  
 NUC1 13C  
 P1 8.50 usec  
 PL1 1.00 dB  
 PL1W 75.02186584 W  
 SFO1 100.6228298 MHz

==== CHANNEL f2 =====  
 CPDPRG2 waltz16  
 NUC2 1H  
 PCPD2 90.00 usec  
 PL2 -2.00 dB  
 PL12 18.23 dB  
 PL13 19.00 dB  
 PL2W 31.17179108 W  
 PL12W 0.29563907 W  
 PL13W 0.24760634 W  
 SFO2 400.1316005 MHz  
 SI 32768  
 SF 100.6127690 MHz  
 WDW EM  
 SSB 0  
 FB 1.00 Hz  
 GB 0  
 PC 1.40

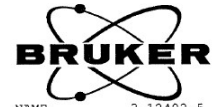

NAME 3-12402-5  
EXPNO 7  
PROCNO 1  
Date\_ 20160115  
Time 13.22  
INSTRUM spect  
PROBHD 5 mm PABBO BB-  
PULPROG zg30  
TD 65536  
SOLVENT CDCl3  
NS 16  
DS 2  
SWH 8223.685 Hz  
FIDRES 0.125483 Hz  
AQ 3.9846387 sec  
RG 456  
DW 60.800 usec  
DE 6.50 usec  
TE 295.9 K  
D1 1.00000000 sec  
TDO 1

----- CHANNEL f1 -----  
NUC1 1H  
P1 8.76 usec  
PL1 -2.00 dB  
PL1W 31.17179108 W  
SFO1 400.1324710 MHz  
SI 32768  
SF 400.1300083 MHz  
WDW EM  
SSB 0  
LB 0.30 Hz  
GB 0  
PC 1.00

7.88  
7.85  
7.82  
7.72  
7.67  
7.67  
7.45  
7.45  
7.40

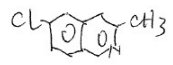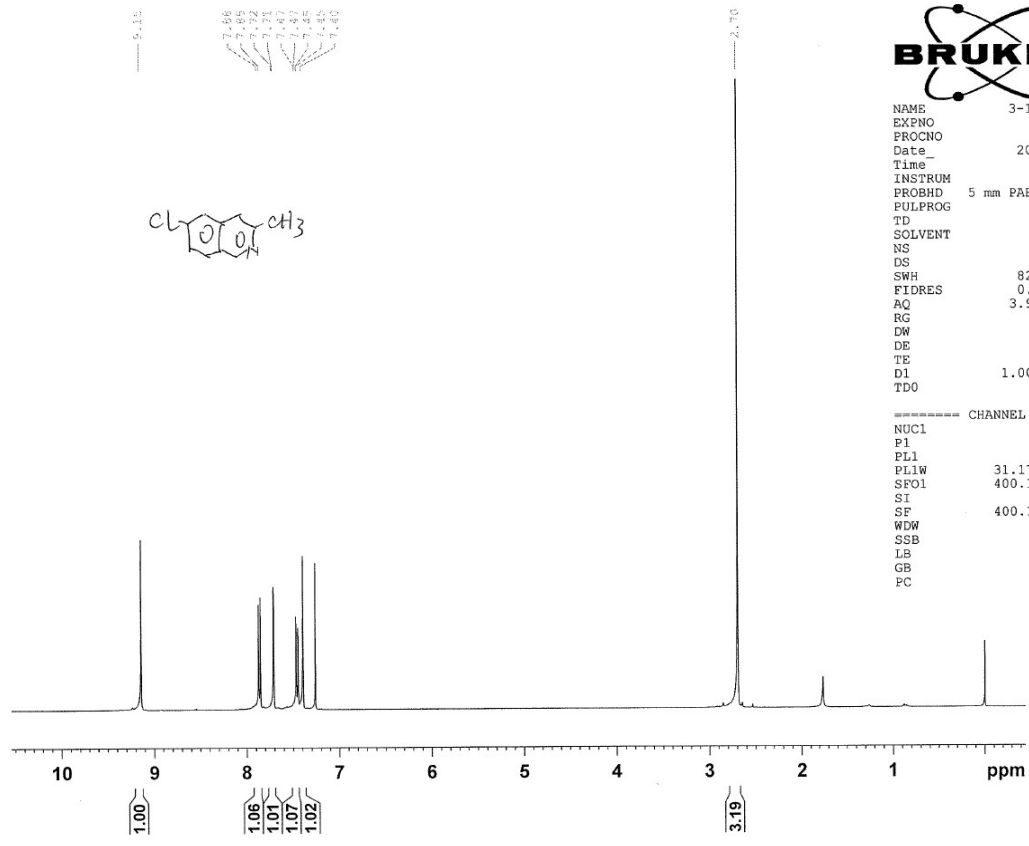

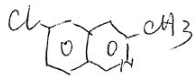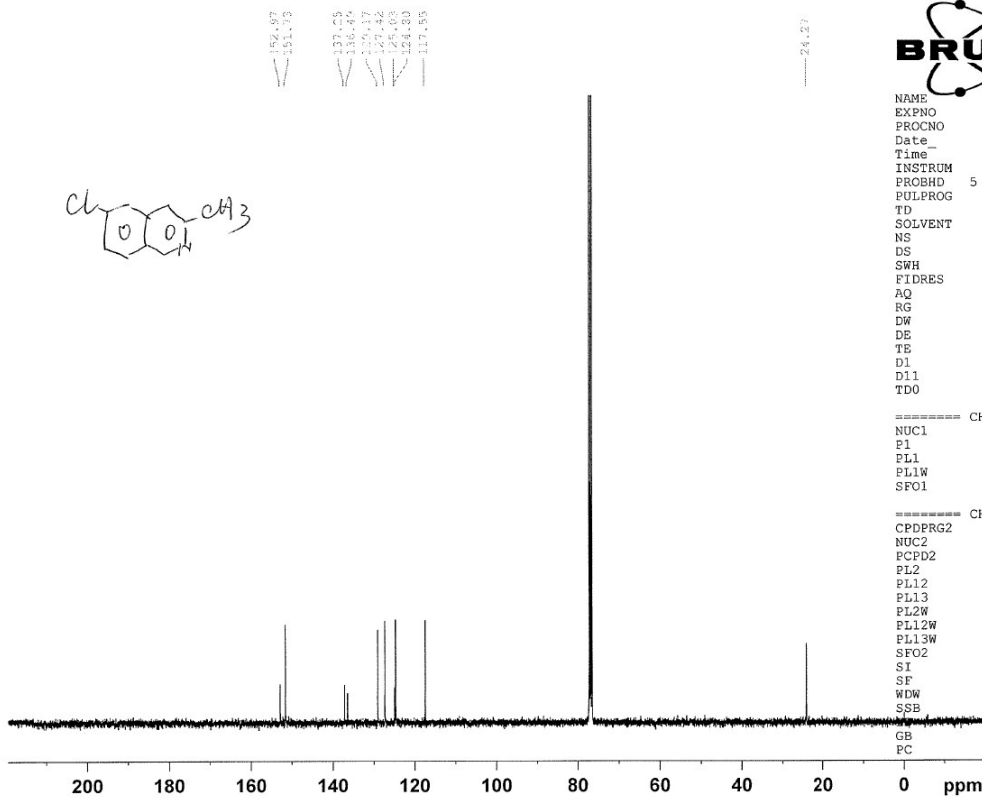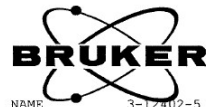

```

NAME      3-12402-5
EXPNO     4
PROCNO    1
Date_     20160114
Time      1.01
INSTRUM   spect
PROBHD    5 mm PABBO BB-
PULPROG   zgpg30
TD         65536
SOLVENT   CDCl3
NS         2048
DS         4
SWH       24038.461 Hz
FIDRES    0.366798 Hz
AQ         1.3631988 sec
RG         2050
DW         20.800 usec
DE         6.50 usec
TE         297.4 K
D1         2.00000000 sec
D11        0.03000000 sec
TD0        1
  
```

```

===== CHANNEL f1 =====
NUC1      13C
P1        8.50 usec
PL1       1.00 dB
PL1W      75.02186584 W
SFO1      100.6228298 MHz
  
```

```

===== CHANNEL f2 =====
CPDPRG2   waltz16
NUC2       1H
PCPD2     90.00 usec
PL2       -2.00 dB
PL12      18.23 dB
PL13      19.00 dB
PL2W      31.17179108 W
PL12W     0.29563907 W
PL13W     0.24760634 W
SFO2      400.1316005 MHz
SI        32768
SF        100.6127690 MHz
WDW       EM
SSB       0
GB        1.00 Hz
PC        0
PC        1.40
  
```

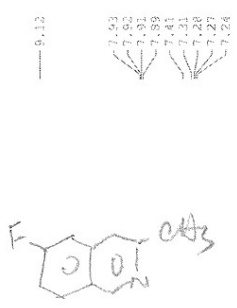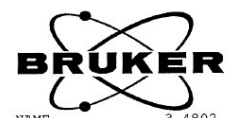

```

NAME          3-4802
EXPNO         4
PROCNO        1
Date_         20150907
Time          21.45
INSTRUM       spect
PROBHD        5 mm PABBO BB-
PULPROG       zg30
TD            65536
SOLVENT       CDC13
NS            16
DS            2
SWH           8223.685 Hz
FIDRES        0.125483 Hz
AQ            3.9846387 sec
RG            144
DW            60.800 usec
DE            6.50 usec
TE            300.9 K
D1            1.0000000 sec
TDO           1

===== CHANNEL f1 =====
NUC1          1H
P1            8.76 usec
PL1           -2.00 dB
PL1W         31.17179108 W
SFO1         400.1324710 MHz
SI           32768
SF           400.1300005 MHz
WDW           EM
SSB           0
LB            0.30 Hz
GB            0
PC            1.00
  
```

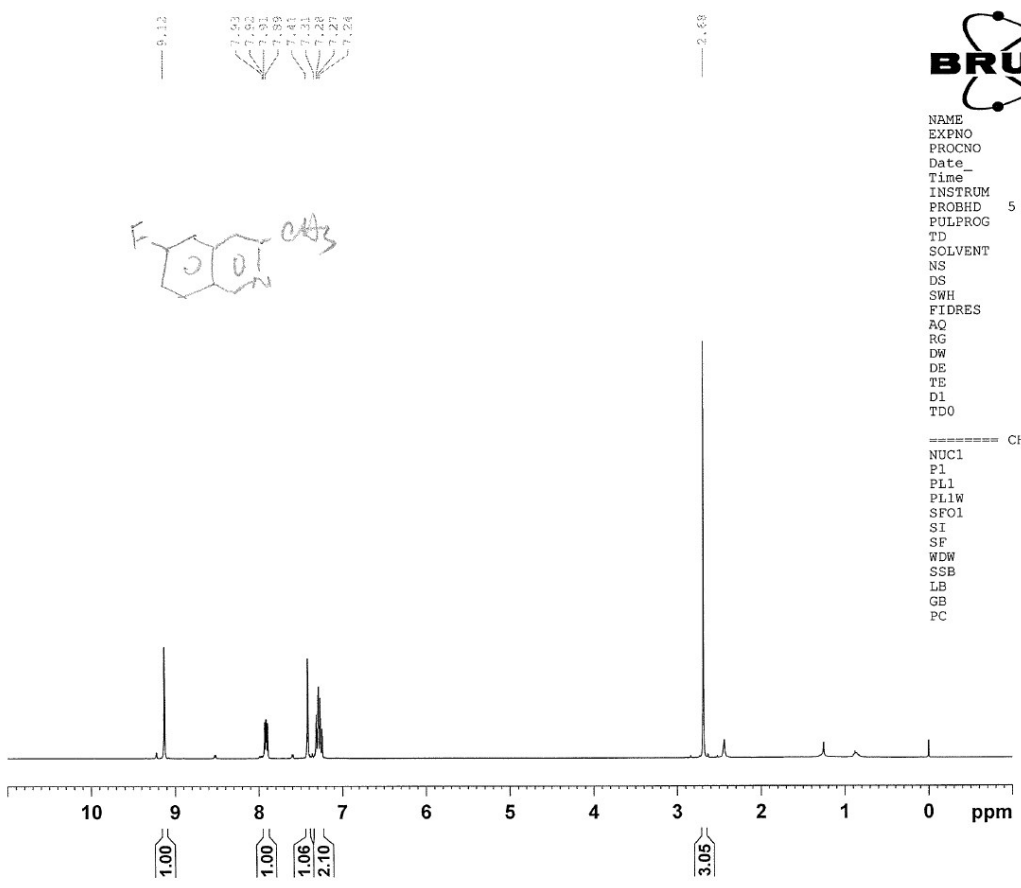



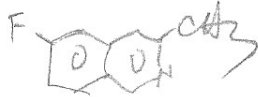

164.52  
162.63  
151.52  
137.98  
137.66  
130.46  
130.30  
124.04  
118.03  
117.97  
116.94  
108.50  
108.03

24.11

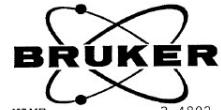

NAME 3-4802  
EXPNO 2  
PROCNO 1  
Date\_ 20150831  
Time\_ 9.04  
INSTRUM spect  
PROBHD 5 mm PABBO BB-  
PULPROG zgpg30  
TD 65536  
SOLVENT CDC13  
NS 1000  
DS 2  
SWH 24038.461 Hz  
FIDRES 0.366798 Hz  
AQ 1.3631988 sec  
RG 2050  
DW 20.800 usec  
DE 6.50 usec  
TE 302.9 K  
D1 2.00000000 sec  
D11 0.03000000 sec  
TD0 1

===== CHANNEL f1 =====  
NUC1 13C  
P1 8.50 usec  
PL1 1.00 dB  
PL1W 75.02186584 W  
SFO1 100.6228298 MHz

===== CHANNEL f2 =====  
CPDPRG2 waltz16  
NUC2 1H  
PCPD2 90.00 usec  
PL2 -2.00 dB  
PL12 18.23 dB  
PL13 19.00 dB  
PL2W 31.17179108 W  
PL12W 0.29563907 W  
PL13W 0.24760634 W  
SFO2 400.1316005 MHz  
SI 32768  
SF 100.6127690 MHz  
WDW EM  
SSB 0  
LB 1.00 Hz  
GB 0  
PC 1.40

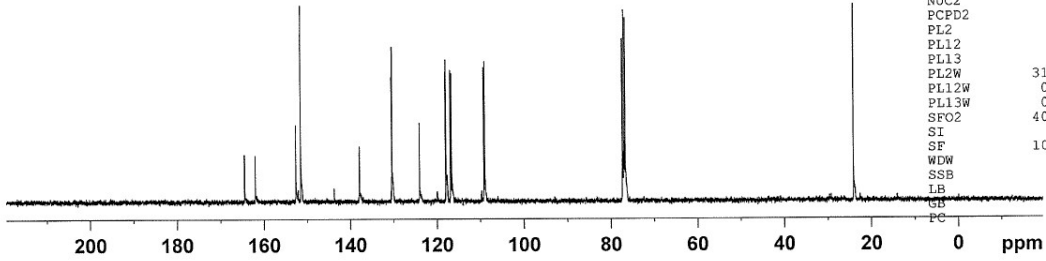

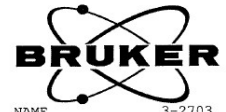

NAME 3-2703  
EXPNO 4  
PROCNO 1  
Date\_ 20150908  
Time\_ 0.16  
INSTRUM spect  
PROBHD 5 mm PABBO BB-  
PULPROG zg30  
TD 65536  
SOLVENT CDCl3  
NS 16  
DS 2  
SWH 8223.685 Hz  
FIDRES 0.125483 Hz  
AQ 3.9846387 sec  
RG 228  
DW 60.800 usec  
DE 6.50 usec  
TE 301.1 K  
D1 1.0000000 sec  
TD0 1

=====  
CHANNEL f1  
NUC1 1H  
P1 8.76 usec  
PL1 -2.00 dB  
PL1W 31.17179108 W  
SFO1 400.1324710 MHz  
SI 32768  
SF 400.1300058 MHz  
WDW EM  
SSB 0  
LB 0.30 Hz  
GB 0  
PC 1.00

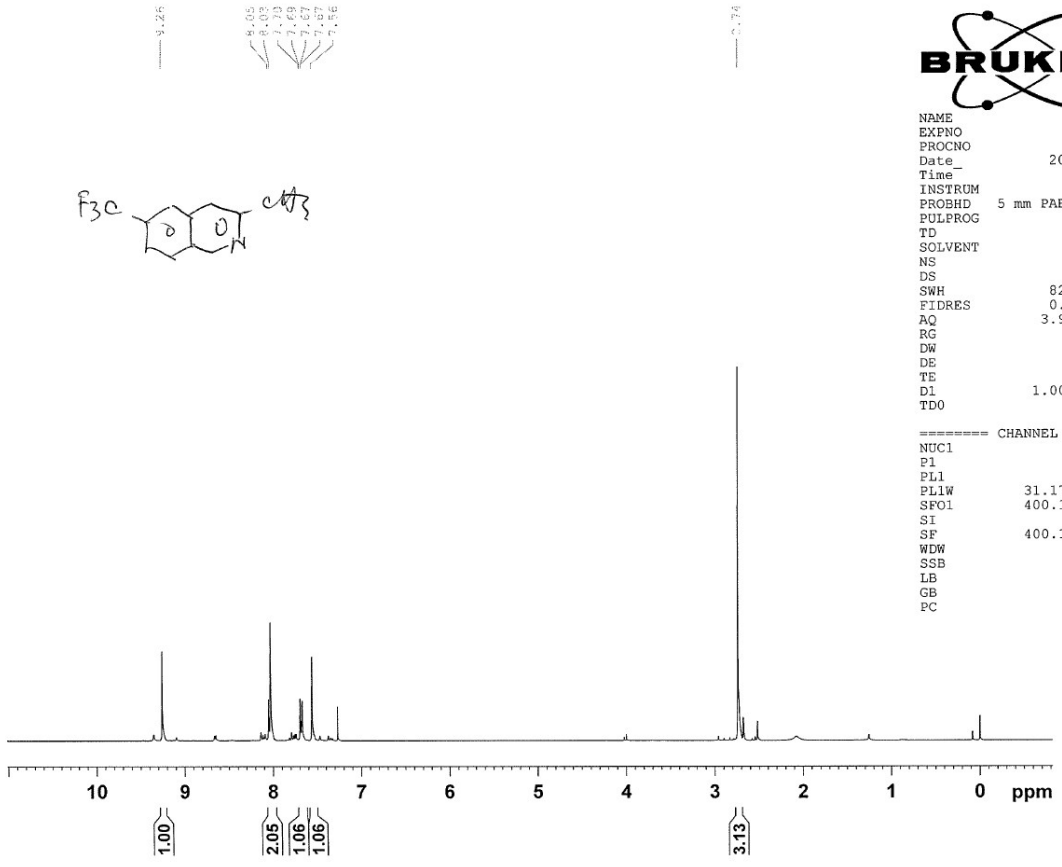

132.40  
131.97  
144.38  
137.55  
142.08  
122.06  
131.79  
131.74  
138.05  
128.47  
115.65  
132.61  
132.75  
132.82  
131.84  
118.98

24.20

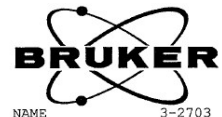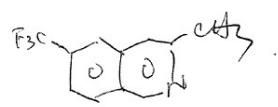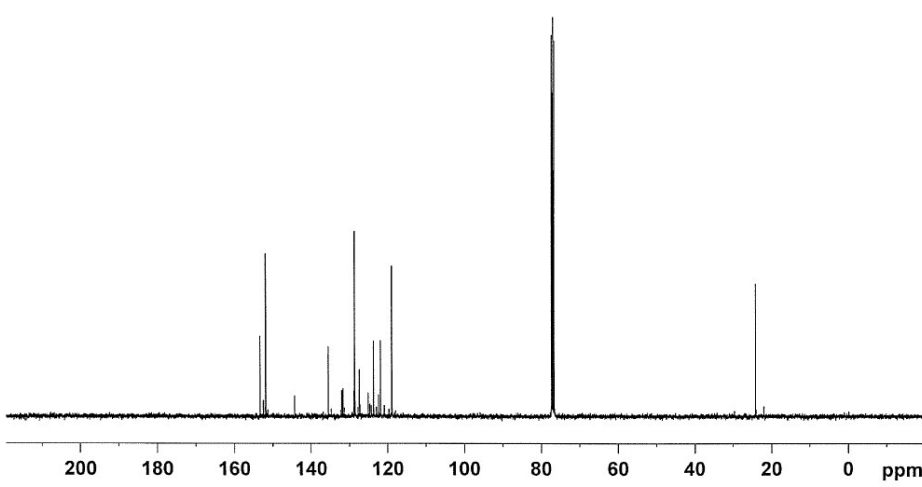

NAME 3-2703  
EXPNO 5  
PROCNO 1  
Date\_ 20150908  
Time\_ 1.15  
INSTRUM spect  
PROBHD 5 mm PABBO BB-  
PULPROG zgpg30  
TD 65536  
SOLVENT CDC13  
NS 1000  
DS 2  
SWH 24038.461 Hz  
FIDRES 0.366798 Hz  
AQ 1.3631988 sec  
RG 2050  
DW 20.800 usec  
DE 6.50 usec  
TE 302.2 K  
D1 2.0000000 sec  
D11 0.0300000 sec  
TDO 1

===== CHANNEL f1 =====  
NUC1 13C  
P1 8.50 usec  
PL1 1.00 dB  
PL1W 75.02186584 W  
SFO1 100.6228298 MHz

===== CHANNEL f2 =====  
CFDPRG2 waltz16  
NUC2 1H  
PCPD2 90.00 usec  
PL2 -2.00 dB  
PL12 18.23 dB  
PL13 19.00 dB  
PL2W 31.17179108 W  
PL12W 0.29563907 W  
PL13W 0.24760634 W  
SFO2 400.1316005 MHz  
SI 32768  
SF 100.6127690 MHz  
WDW EM  
SSB 0  
LB 1.00 Hz  
GB 0  
PC 1.40

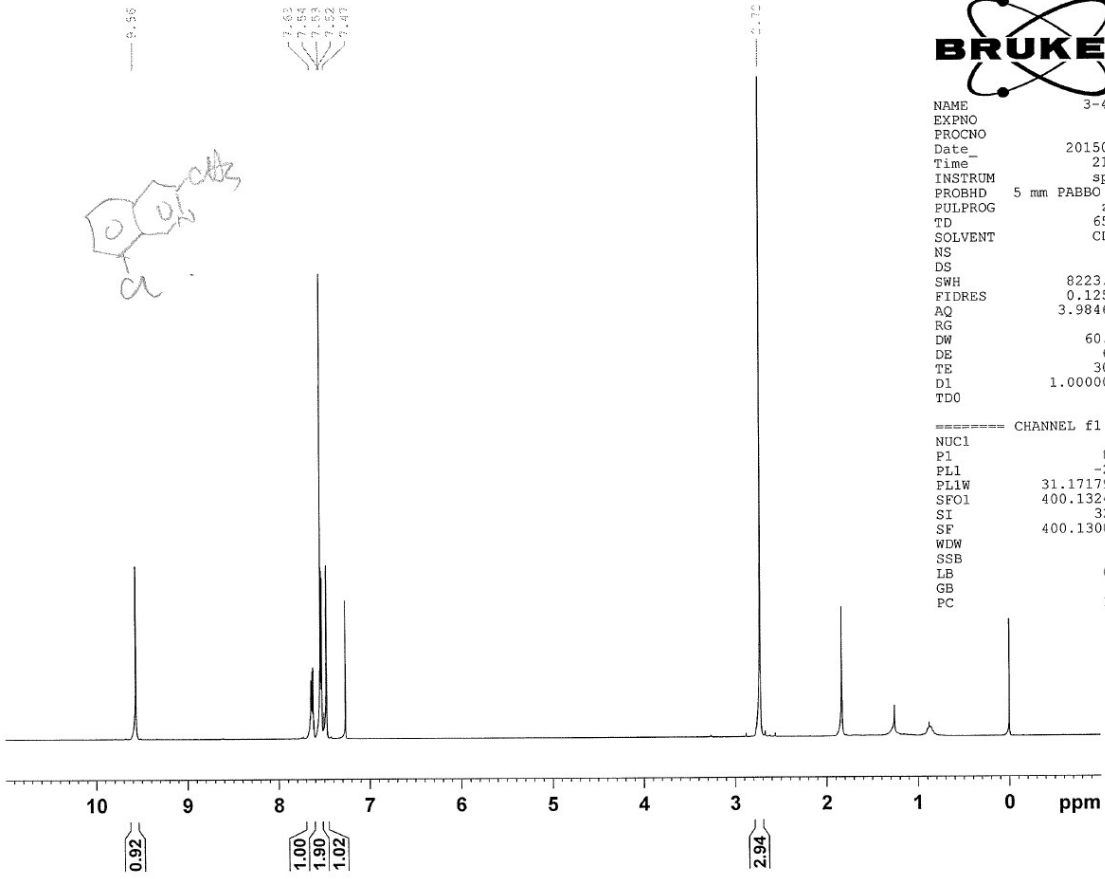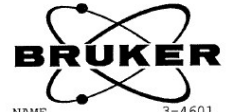

```

NAME          3-4601
EXPNO         3
PROCNO        1
Date_         20150907
Time          21.39
INSTRUM       spect
PROBHD        5 mm PABBO BB-
PULPROG       zg30
TD            65536
SOLVENT       CDCl3
NS            16
DS            2
SWH           8223.685 Hz
FIDRES        0.125483 Hz
AQ            3.9846387 sec
RG            362
DW            60.800 usec
DE            6.50 usec
TE            300.3 K
D1            1.00000000 sec
TDO           1
  
```

```

===== CHANNEL f1 =====
NUC1          1H
P1            8.76 usec
PL1           -2.00 dB
PL1W          31.17179108 W
SFO1          400.1324710 MHz
SI            32768
SF            400.1300081 MHz
WDW           EM
SSB           0
LB            0.30 Hz
GB            0
PC            1.00
  
```

157.79  
149.94  
137.89  
134.52  
132.39  
128.72  
125.13  
116.51  
113.15

29.05

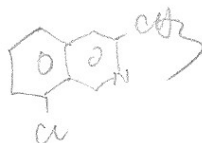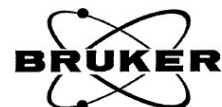

```

NAME      3-4601
EXPNO     2
PROCNO    1
Date_     20150831
Time      22.08
INSTRUM   spect
PROBHD    5 mm PABBO BB-
PULPROG   zgpg30
TD         65536
SOLVENT   CDCl3
NS         129
DS         2
SWH       24038.461 Hz
FIDRES    0.366798 Hz
AQ         1.3631988 sec
RG         2050
DW         20.800 usec
DE         6.50 usec
TE         302.9 K
D1         2.00000000 sec
D11        0.03000000 sec
TD0        1
  
```

```

===== CHANNEL f1 =====
NUC1      13C
P1        8.50 usec
PL1       1.00 dB
PL1W      75.02186584 W
SFO1      100.6228298 MHz
  
```

```

===== CHANNEL f2 =====
CPDPRG2   waltz16
NUC2      1H
PCPD2     90.00 usec
PL2       -2.00 dB
PL12      18.23 dB
PL13      19.00 dB
PL2W      31.17179108 W
PL12W     0.29563907 W
PL13W     0.24760634 W
SFO2      400.1316005 MHz
SI         32768
SF        100.6127690 MHz
WDW        EM
SSB         0
LB         1.00 Hz
GB         0
PC         1.40
  
```

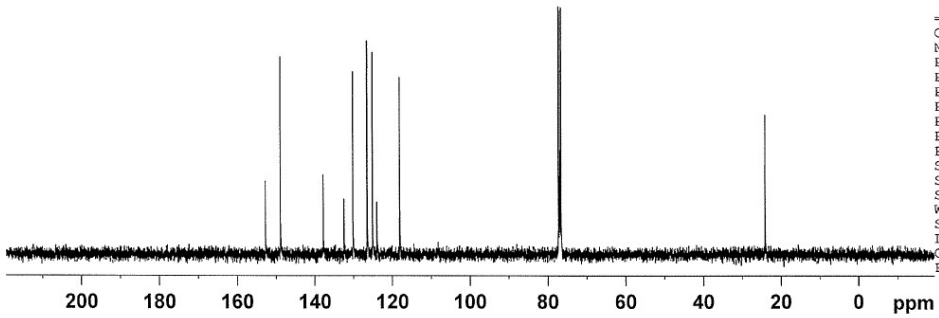

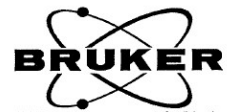

NAME 3-51-4  
EXPNO 1  
PROCNO 1  
Date\_ 20150904  
Time\_ 21.53  
INSTRUM spect  
PROBHD 5 mm PABBO BB-  
PULPROG zg30  
TD 65536  
SOLVENT CDCl3  
NS 16  
DS 2  
SWH 8223.685 Hz  
FIDRES 0.125483 Hz  
AQ 3.9846387 sec  
RG 181  
DW 60.800 usec  
DE 6.50 usec  
TE 301.7 K  
D1 1.00000000 sec  
TD0 1

===== CHANNEL f1 =====  
NUC1 1H  
P1 8.76 usec  
PL1 -2.00 dB  
PL1W 31.17179108 W  
SF01 400.1324710 MHz  
SI 32768  
SF 400.1300128 MHz  
WDW EM  
SSB 0  
LB 0.30 Hz  
GB 0  
PC 1.00

7.11  
7.06  
7.06  
7.01

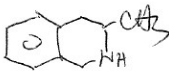

4.13  
4.09  
4.05  
4.01

3.02  
2.98  
2.79  
2.76  
2.75  
2.74  
2.50  
2.47

1.73  
1.25  
1.23

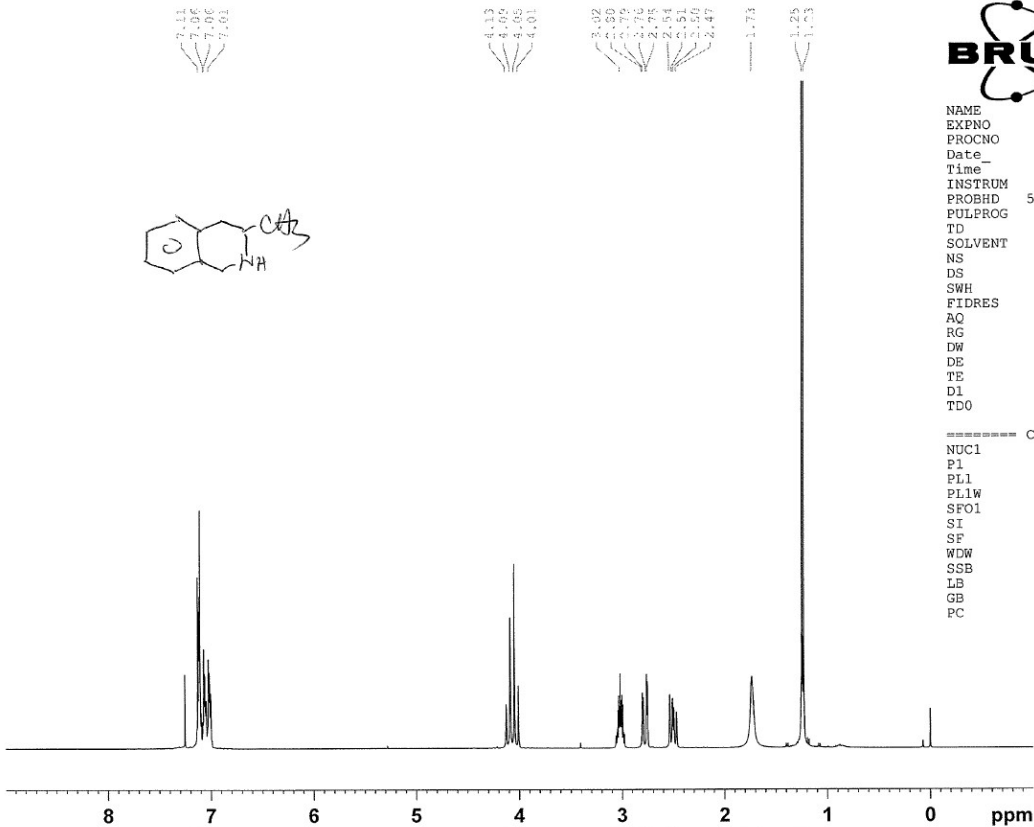

1.88  
0.99  
0.98

2.00

0.97  
0.97  
0.98

1.59

3.04

8 7 6 5 4 3 2 1 0 ppm

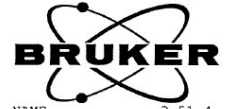

NAME 3-51-4  
EXPNO 2  
PROCNO 1  
Date\_ 20150905  
Time 17.21  
INSTRUM spect  
PROBHD 5 mm PABBO BB-  
PULPROG zgpg30  
TD 65536  
SOLVENT CDCl3  
NS 743  
DS 2  
SWH 24038.461 Hz  
FIDRES 0.366798 Hz  
AQ 1.3631988 sec  
RG 2050  
DW 20.800 usec  
DE 6.50 usec  
TE 301.8 K  
D1 2.00000000 sec  
D11 0.03000000 sec  
TDO 1

===== CHANNEL f1 =====  
NUC1 13C  
P1 8.50 usec  
PL1 1.00 dB  
PL1W 75.02186584 W  
SFO1 100.6228298 MHz

===== CHANNEL f2 =====  
CPDPRG2 waltz16  
NUC2 1H  
PCPD2 90.00 usec  
PL2 -2.00 dB  
PL12 18.23 dB  
PL13 19.00 dB  
PL2W 31.17179108 W  
PL12W 0.29563907 W  
PL13W 0.24760634 W  
SFO2 400.1316005 MHz  
SI 32768  
SF 100.6127690 MHz  
WDW EM  
SBB 0  
LB 1.00 Hz  
GB 0  
PC 1.40

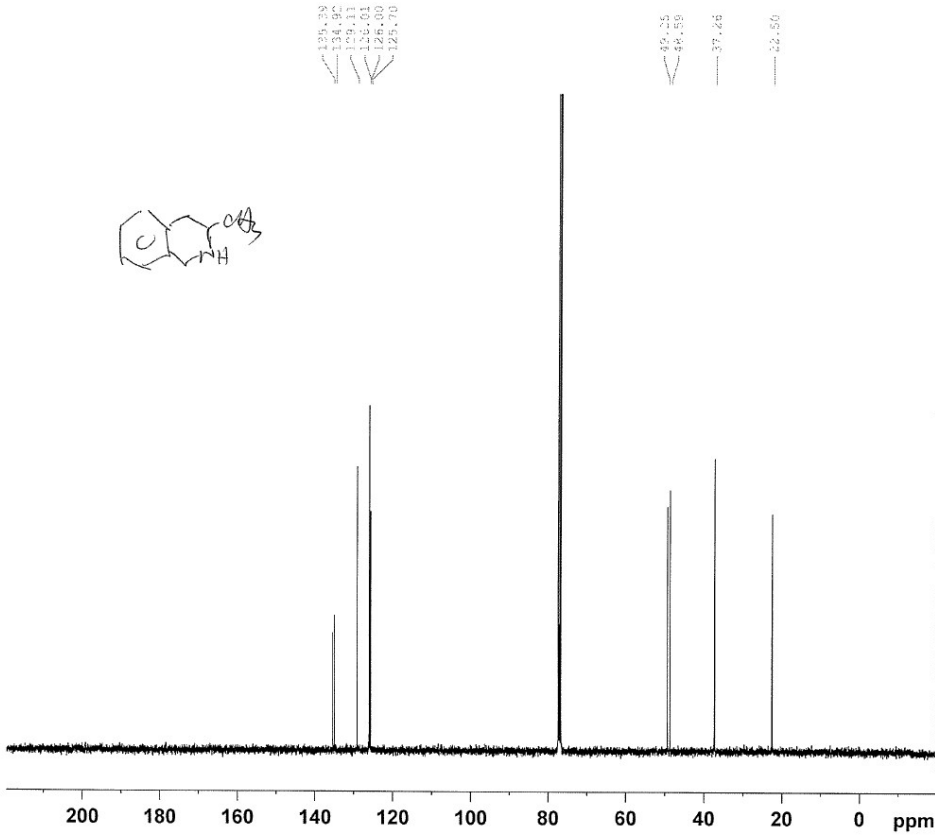

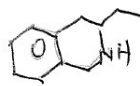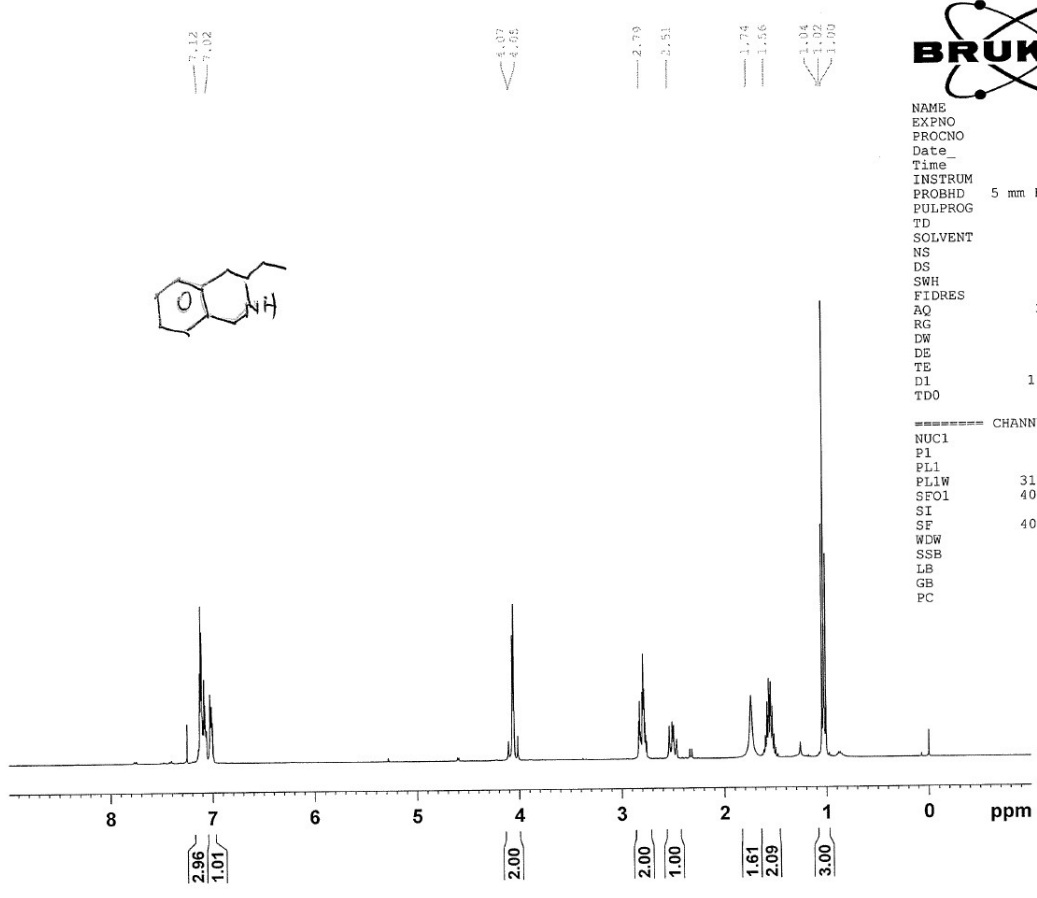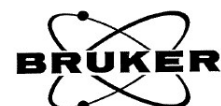

NAME 3-47-1  
 EXPNO 1  
 PROCNO 1  
 Date 20150823  
 Time 23.32  
 INSTRUM spect  
 PROBHD 5 mm PABBO BB-  
 PULPROG zg30  
 TD 65536  
 SOLVENT CDCl3  
 NS 16  
 DS 2  
 SWH 8223.685 Hz  
 FIDRES 0.125483 Hz  
 AQ 3.9846387 sec  
 RG 161  
 DW 60.800 usec  
 DE 6.50 usec  
 TE 299.8 K  
 D1 1.00000000 sec  
 TDO 1

===== CHANNEL f1 =====  
 NUC1 1H  
 P1 8.76 usec  
 PL1 -2.00 dB  
 PL1W 31.17179108 W  
 SFO1 400.1324710 MHz  
 SI 32768  
 SF 400.1300131 MHz  
 WDW EM  
 SSB 0  
 LB 0.30 Hz  
 GB 0  
 PC 1.00



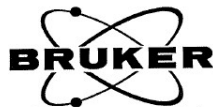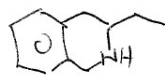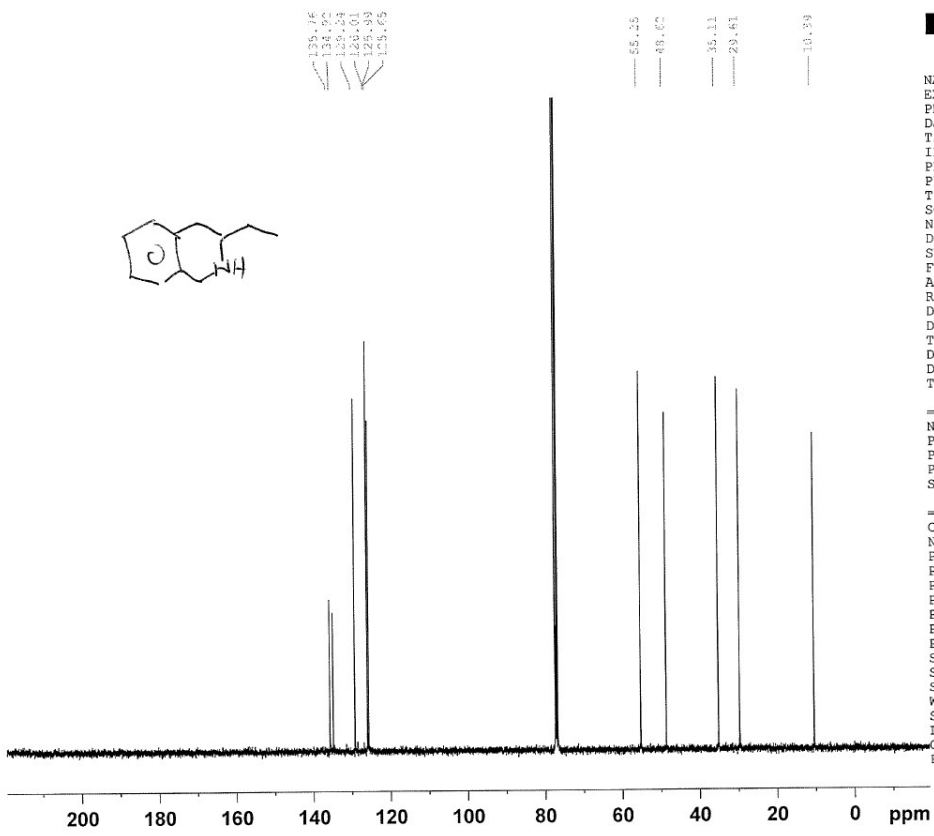

NAME 3-47-1  
EXPNO 2  
PROCNO 1  
Date\_ 20150824  
Time\_ 0.33  
INSTRUM spect  
PROBHD 5 mm PABBO BB-  
PULPROG zgpg30  
TD 65536  
SOLVENT CDC13  
NS 1024  
DS 4  
SWH 24038.461 Hz  
FIDRES 0.366798 Hz  
AQ 1.3631988 sec  
RG 2050  
DW 20.800 usec  
DE 6.50 usec  
TE 301.8 K  
D1 2.0000000 sec  
D11 0.0300000 sec  
TDO 1

===== CHANNEL f1 =====  
NUC1 13C  
P1 8.50 usec  
PL1 1.00 dB  
PL1W 75.02186584 W  
SFO1 100.6228298 MHz

===== CHANNEL f2 =====  
CPDPRG2 waltz16  
NUC2 1H  
PCPD2 90.00 usec  
PL2 -2.00 dB  
PL12 18.23 dB  
PL13 19.00 dB  
PL2W 31.17179108 W  
PL12W 0.29563907 W  
PL13W 0.24760634 W  
SFO2 400.1316005 MHz  
SI 32768  
SF 100.6127690 MHz  
WDW EM  
SSB 0  
LB 1.00 Hz  
GB 0  
PC 1.40

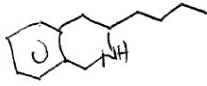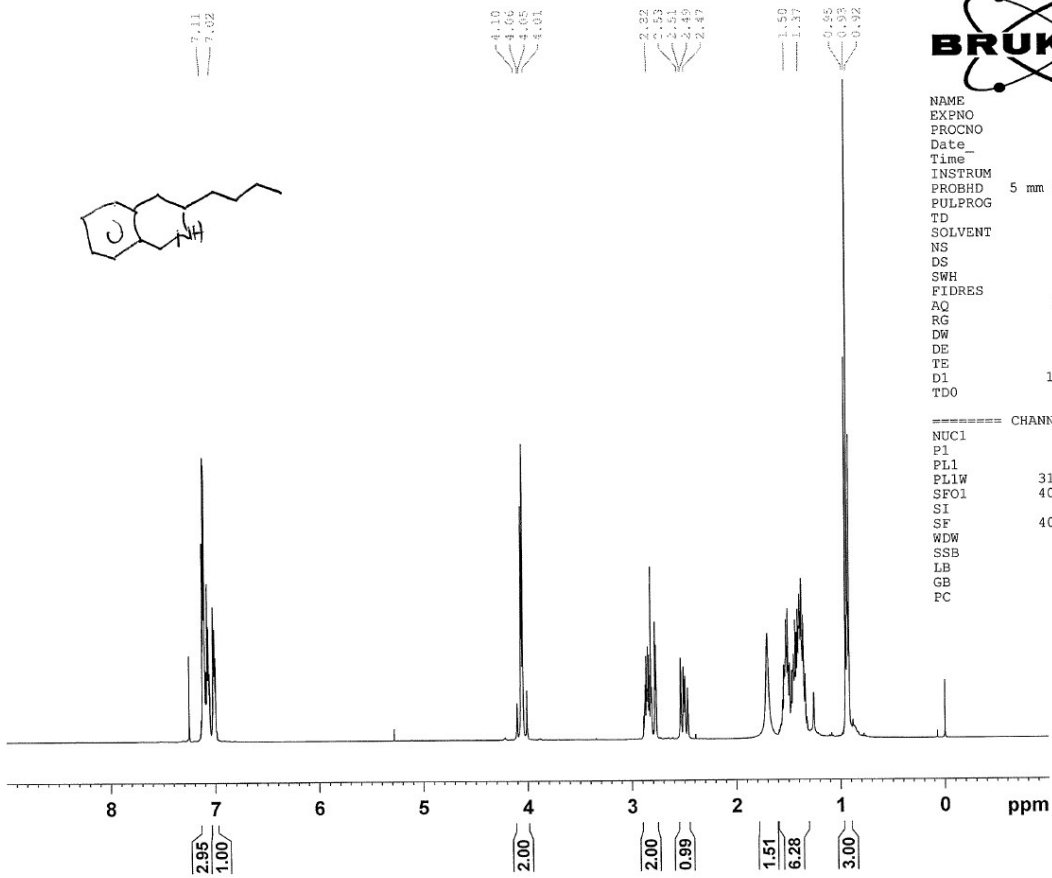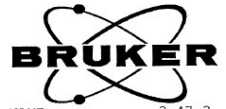

```

NAME      3-47-3
EXPNO     1
PROCNO    1
Date_     20150824
Time      1.44
INSTRUM   spect
PROBHD    5 mm PABBO BB-
PULPROG   zg30
TD         65536
SOLVENT   CDC13
NS         16
DS         2
SWH       8223.685 Hz
FIDRES    0.125483 Hz
AQ         3.9846387 sec
RG         128
DW         60.800 usec
DE         6.50 usec
TE         300.6 K
D1         1.0000000 sec
TDO        1
  
```

```

===== CHANNEL f1 =====
NUC1      1H
P1        8.76 usec
PL1       -2.00 dB
PL1W      31.17179108 W
SFO1      400.1324710 MHz
SI        32768
SF         400.1300136 MHz
WDW        EM
SSB        0
LB         0.30 Hz
GB         0
PC         1.00
  
```

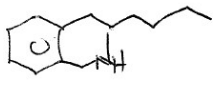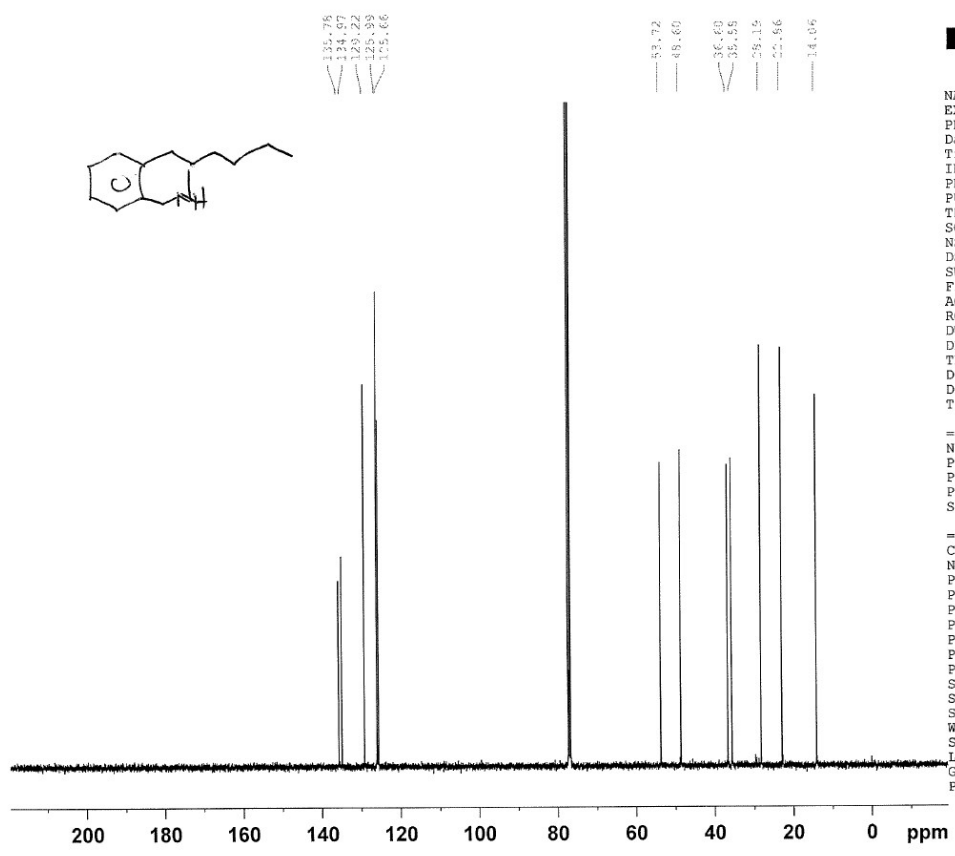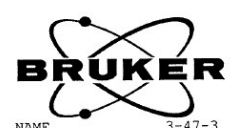

```

NAME 3-47-3
EXPNO 2
PROCNO 1
Date_ 20150824
Time_ 2.45
INSTRUM spect
PROBHD 5 mm PABBO BB-
PULPROG zgpg30
TD 65536
SOLVENT CDCl3
NS 1024
DS 4
SWH 24038.461 Hz
FIDRES 0.366798 Hz
AQ 1.3631988 sec
RG 2050
DW 20.800 usec
DE 6.50 usec
TE 301.9 K
D1 2.00000000 sec
D11 0.03000000 sec
TDO 1

===== CHANNEL f1 =====
NUC1 13C
P1 8.50 usec
PL1 1.00 dB
PL1W 75.02186584 W
SFO1 100.6228298 MHz

===== CHANNEL f2 =====
CPDPRG2 waltz16
NUC2 1H
PCPD2 90.00 usec
PL2 -2.00 dB
PL12 18.23 dB
PL13 19.00 dB
PL2W 31.17179108 W
PL12W 0.29563907 W
PL13W 0.24760634 W
SFO2 400.1316005 MHz
SI 32768
SF 100.6127690 MHz
WDW EM
SSB 0
LB 1.00 Hz
GB 0
PC 1.40

```

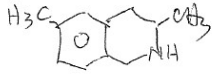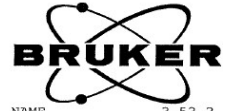

```

NAME      3-53-3
EXPNO    1
PROCNO   1
Date_    20150909
Time     19.22
INSTRUM  spect
PROBHD   5 mm PABBO BB-
PULPROG  zg30
TD       65536
SOLVENT  CDCl3
NS       16
DS       2
SWH      8223.685 Hz
FIDRES   0.125483 Hz
AQ       3.9846387 sec
RG       203
DW       60.800 usec
DE       6.50 usec
TE       302.4 K
D1       1.0000000 sec
TDO      1
  
```

```

===== CHANNEL f1 =====
NUC1     1H
P1       8.76 usec
PL1      -2.00 dB
PL1W     31.17179108 W
SFO1     400.1324710 MHz
SI       32768
SF       400.1300140 MHz
WDW      EM
SSB      0
LB       0.30 Hz
GB       0
PC       1.00
  
```

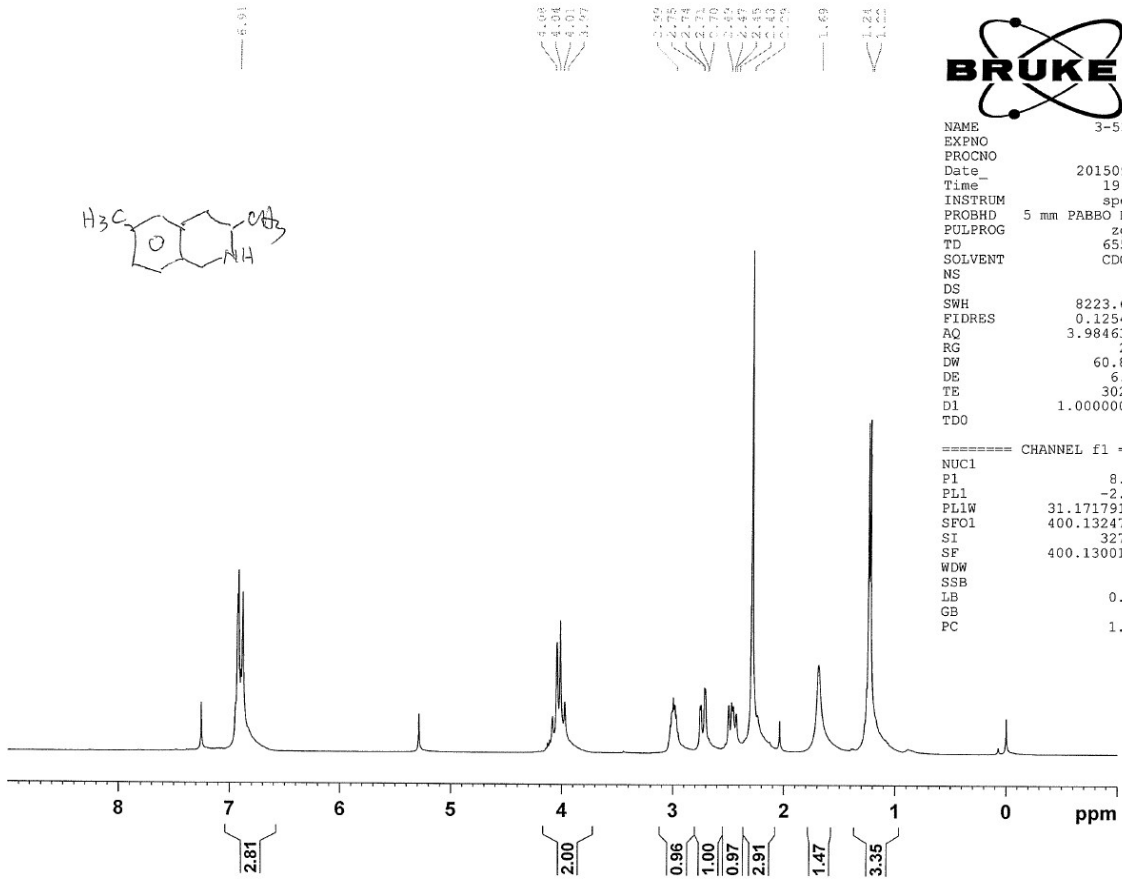



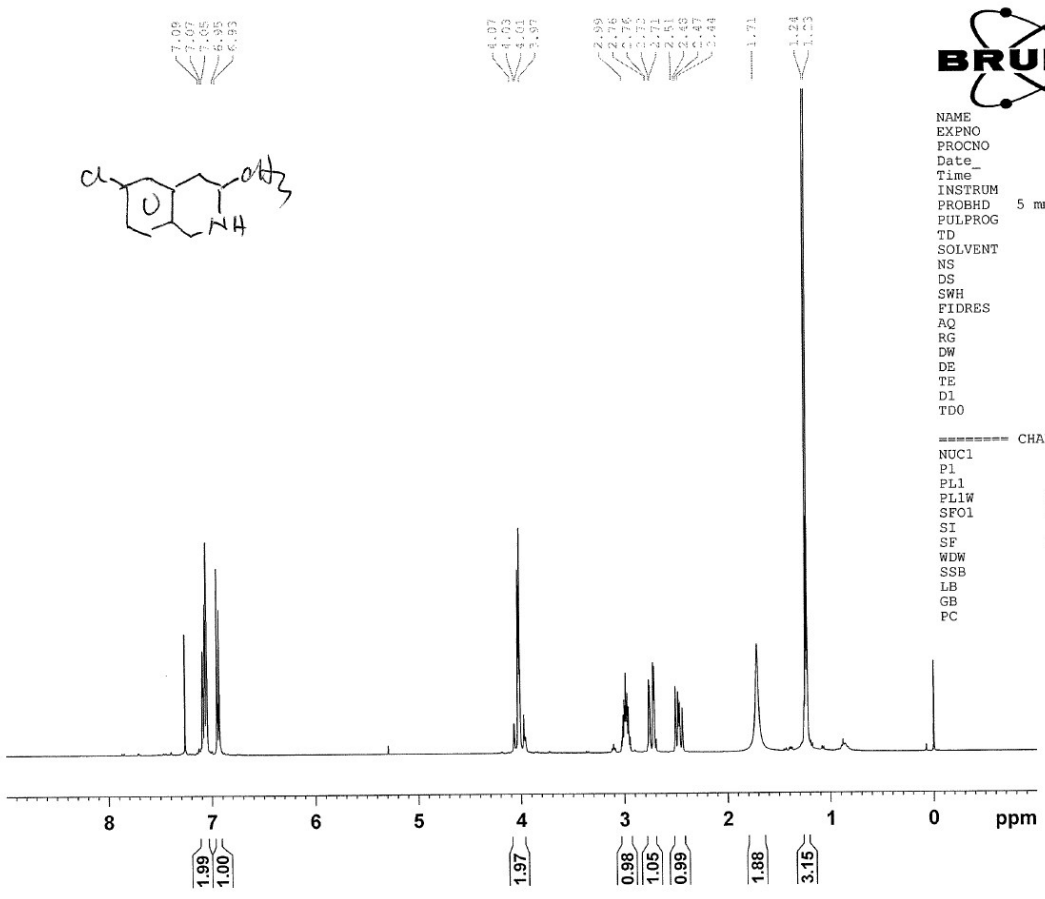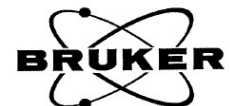

```

NAME      3-47-6
EXPNO     1
PROCNO    1
Date_     20150824
Time      5.04
INSTRUM   spect
PROBHD    5 mm PABBO BB-
PULPROG   zg30
TD         65536
SOLVENT   CDCl3
NS         16
DS         2
SWH       8223.685 Hz
FIDRES    0.125483 Hz
AQ         3.9846387 sec
RG         228
DW         60.800 usec
DE         6.50 usec
TE         300.4 K
D1         1.00000000 sec
TDO        1
  
```

```

===== CHANNEL f1 =====
NUC1      1H
P1         8.76 usec
PL1       -2.00 dB
PL1W      31.17179108 W
SFO1      400.1324710 MHz
SI         32768
SF         400.1300090 MHz
WDW        EM
SSB        0
LB         0.30 Hz
GB         0
PC         1.00
  
```

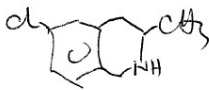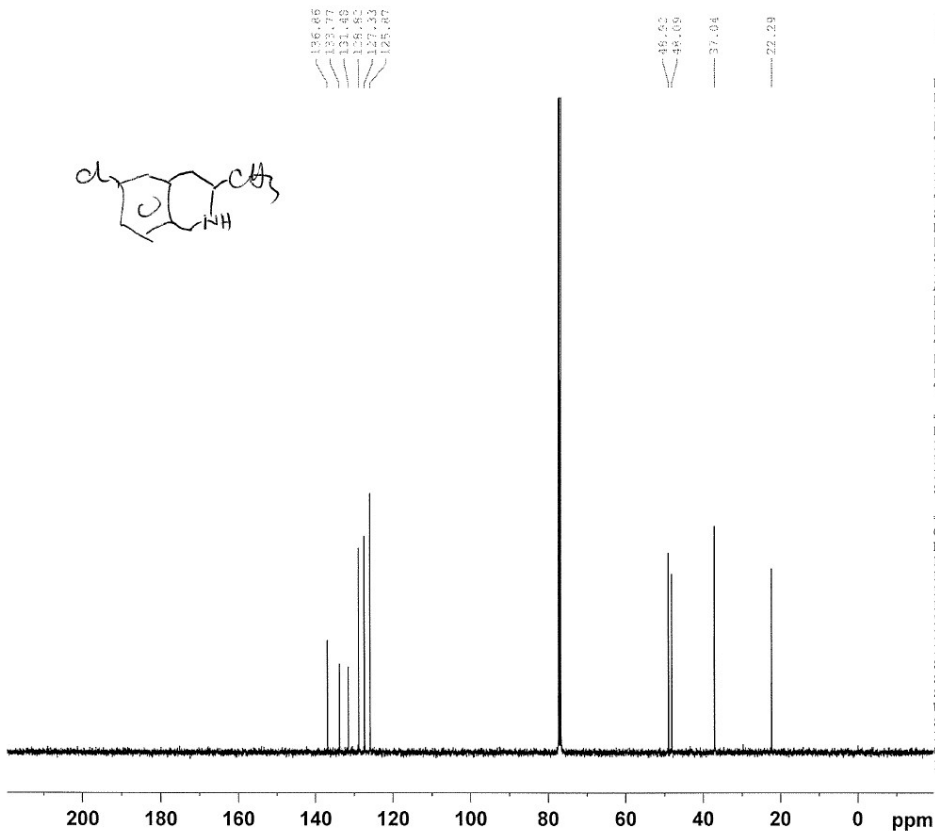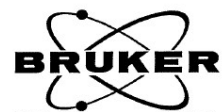

```

NAME 3-47-6
EXPNO 2
PROCNO 1
Date_ 20150824
Time_ 6.04
INSTRUM spect
PROBHD 5 mm PABBO BB-
PULPROG zgpg30
TD 65536
SOLVENT CDCl3
NS 1024
DS 4
SWH 24038.461 Hz
FIDRES 0.366798 Hz
AQ 1.3631988 sec
RG 2050
DW 20.800 usec
DE 6.50 usec
TE 301.6 K
D1 2.0000000 sec
D11 0.0300000 sec
TDO 1

```

```

===== CHANNEL f1 =====
NUC1 13C
P1 8.50 usec
PL1 1.00 dB
PL1W 75.02186584 W
SFO1 100.6228298 MHz

```

```

===== CHANNEL f2 =====
CPDPRG2 waltz16
NUC2 1H
PCPD2 90.00 usec
PL2 -2.00 dB
PL12 18.23 dB
PL13 19.00 dB
PL2W 31.17179108 W
PL12W 0.29563907 W
PL13W 0.24760634 W
SFO2 400.1316005 MHz
SI 32768
SF 100.6127690 MHz
WDW EM
SSB 0
LB 1.00 Hz
GB 0
PC 1.40

```

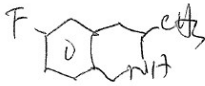

6.85  
6.81  
6.78

4.07  
4.03  
4.02  
3.98

2.99  
2.74  
2.59

1.69  
1.25  
1.23

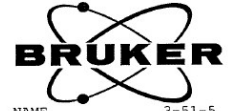

```

NAME          3-51-5
EXPNO         1
PROCNO        1
Date_         20150904
Time          21.59
INSTRUM       spect
PROBHD        5 mm PABBO BB-
PULPROG       zg30
TD            65536
SOLVENT       CDCl3
NS            16
DS            2
SWH           8223.685 Hz
FIDRES        0.125483 Hz
AQ            3.9846387 sec
RG            228
DW            60.800 usec
DE            6.50 usec
TE            301.6 K
D1            1.00000000 sec
TDO           1
  
```

```

===== CHANNEL f1 =====
NUC1          1H
P1            8.76 usec
PL1           -2.00 dB
PL1W          31.17179108 W
SFO1          400.1324710 MHz
SI            32768
SF            400.1300092 MHz
WDW           EM
SSB           0
LB            0.30 Hz
GB            0
PC            1.00
  
```

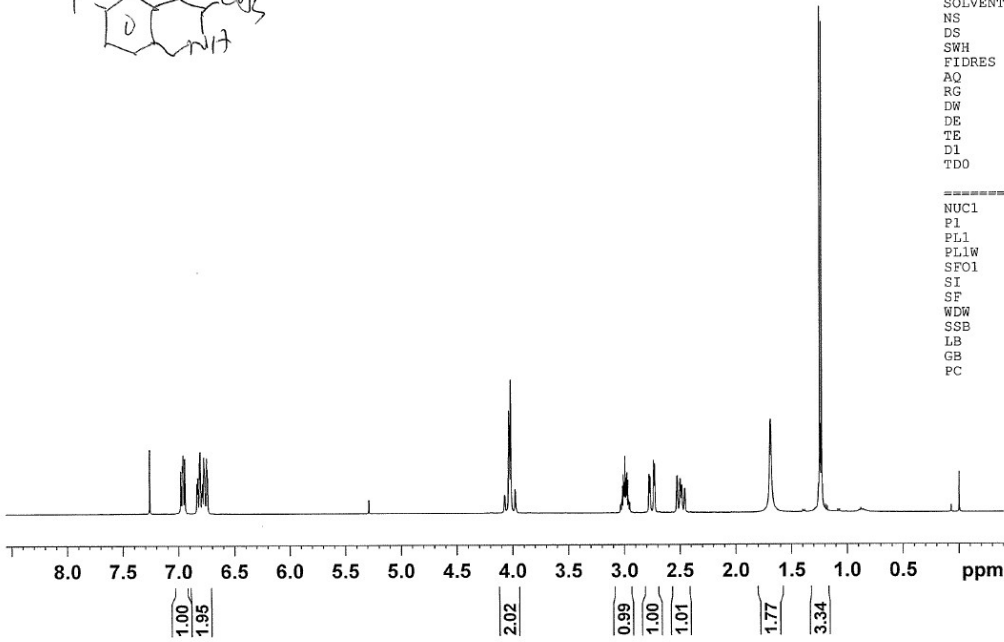



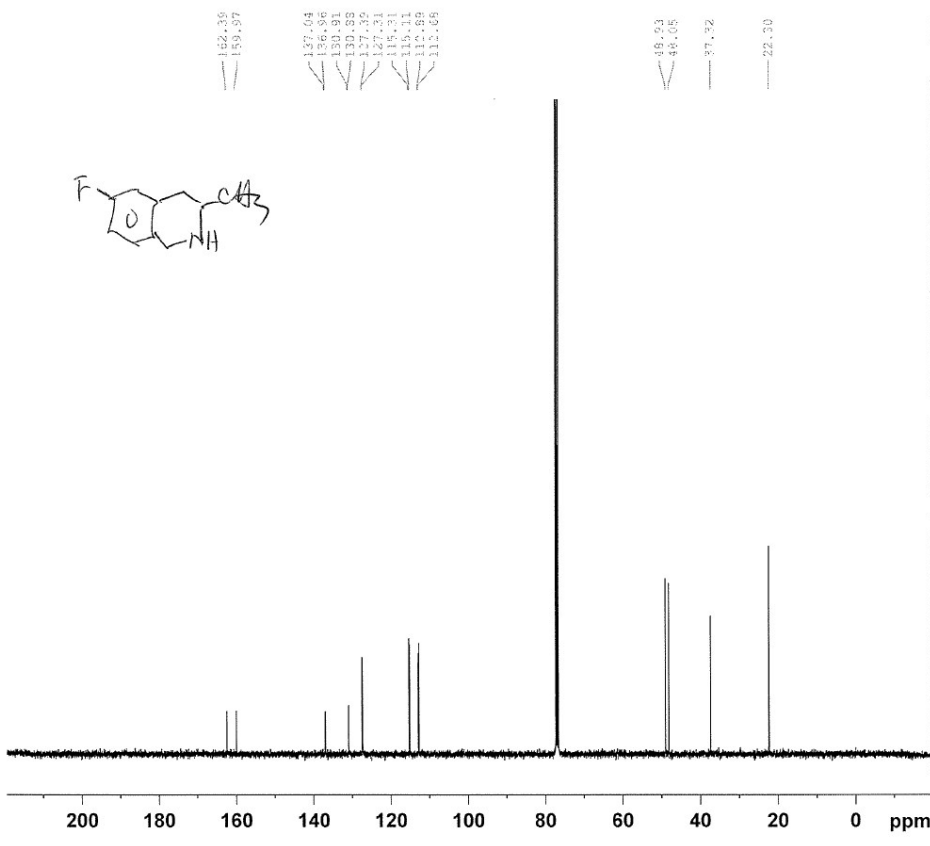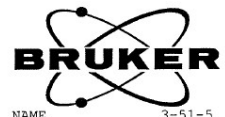

```

NAME      3-51-5
EXPNO     3
PROCNO    1
Date_     20150905
Time      18.24
INSTRUM   spect
PROBHD    5 mm PABBO BB-
PULPROG   zgpg30
TD         65536
SOLVENT   CDCl3
NS         1000
DS         2
SWH       24038.461 Hz
FIDRES    0.366798 Hz
AQ         1.3631988 sec
RG         2050
DW         20.800 usec
DE         6.50 usec
TE         301.9 K
D1         2.00000000 sec
D11        0.03000000 sec
TD0        1
  
```

```

----- CHANNEL f1 -----
NUC1      13C
P1         8.50 usec
PL1        1.00 dB
PL1W       75.02186584 W
SFO1      100.6228298 MHz
  
```

```

----- CHANNEL f2 -----
CPDPRG2   waltz16
NUC2       1H
PCPD2     90.00 usec
PL2        -2.00 dB
PL12       18.23 dB
PL13       19.00 dB
PL2W       31.17179108 W
PL12W      0.29563907 W
PL13W      0.24760634 W
SFO2      400.1316005 MHz
SI         32768
SF         100.6127690 MHz
WDW        EM
SSB         0
LB         1.00 Hz
GB         0
PC         1.40
  
```

3-51-1\_19F  
STANDARD FLUORINE PARAMETERS

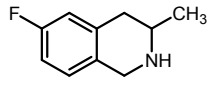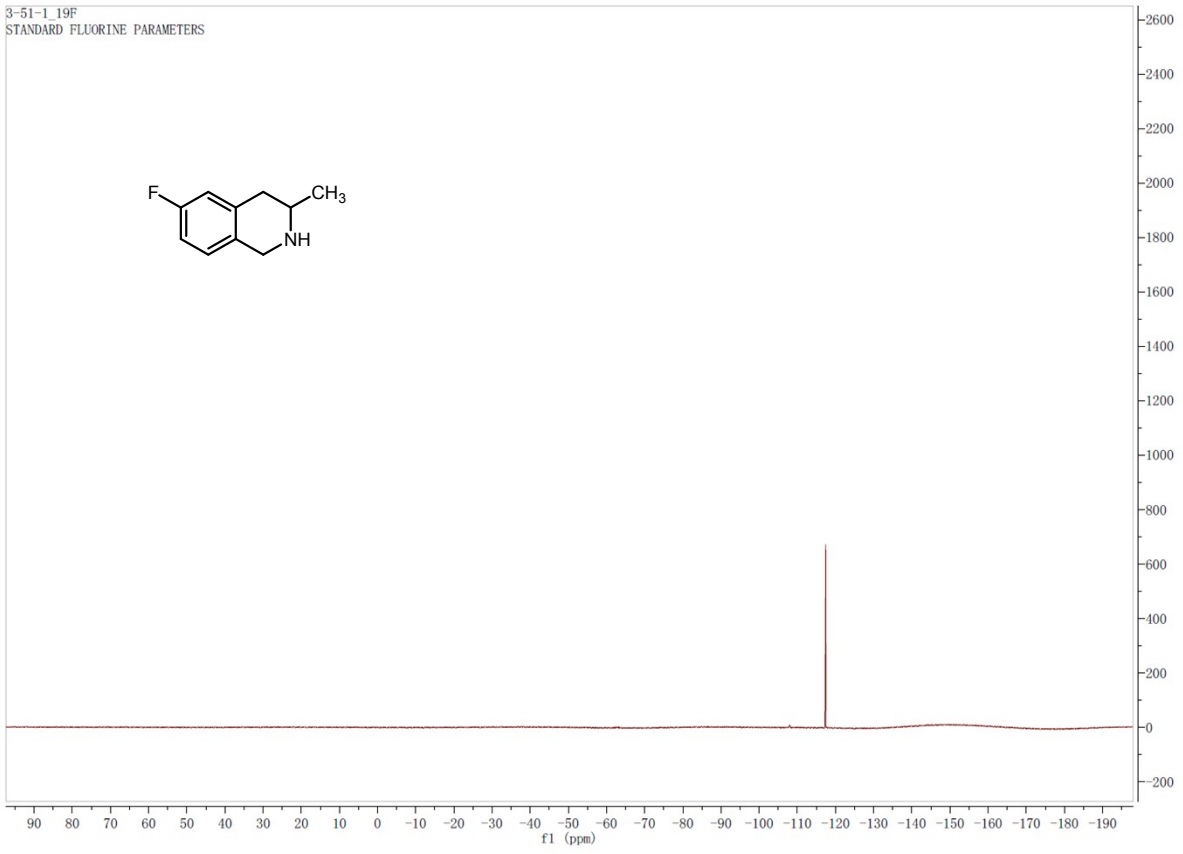

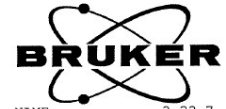

NAME 3-33-7  
EXPNO 1  
PROCNO 1  
Date\_ 20150712  
Time 19.17  
INSTRUM spect  
PROBHD 5 mm PABBO BB-  
PULPROG zg30  
TD 65536  
SOLVENT CDCl3  
NS 64  
DS 2  
SWH 8223.685 Hz  
FIDRES 0.125483 Hz  
AQ 3.9846387 sec  
RG 203  
DW 60.800 usec  
DE 6.50 usec  
TE 301.0 K  
D1 1.00000000 sec  
TD0 1

===== CHANNEL f1 =====  
NUC1 1H  
P1 8.76 usec  
PL1 -2.00 dB  
PLW 31.17179108 W  
SFO1 400.1324710 MHz  
SI 32768  
SF 400.1300088 MHz  
WDW EM  
SSB 0  
LB 0.30 Hz  
GB 0  
PC 1.00

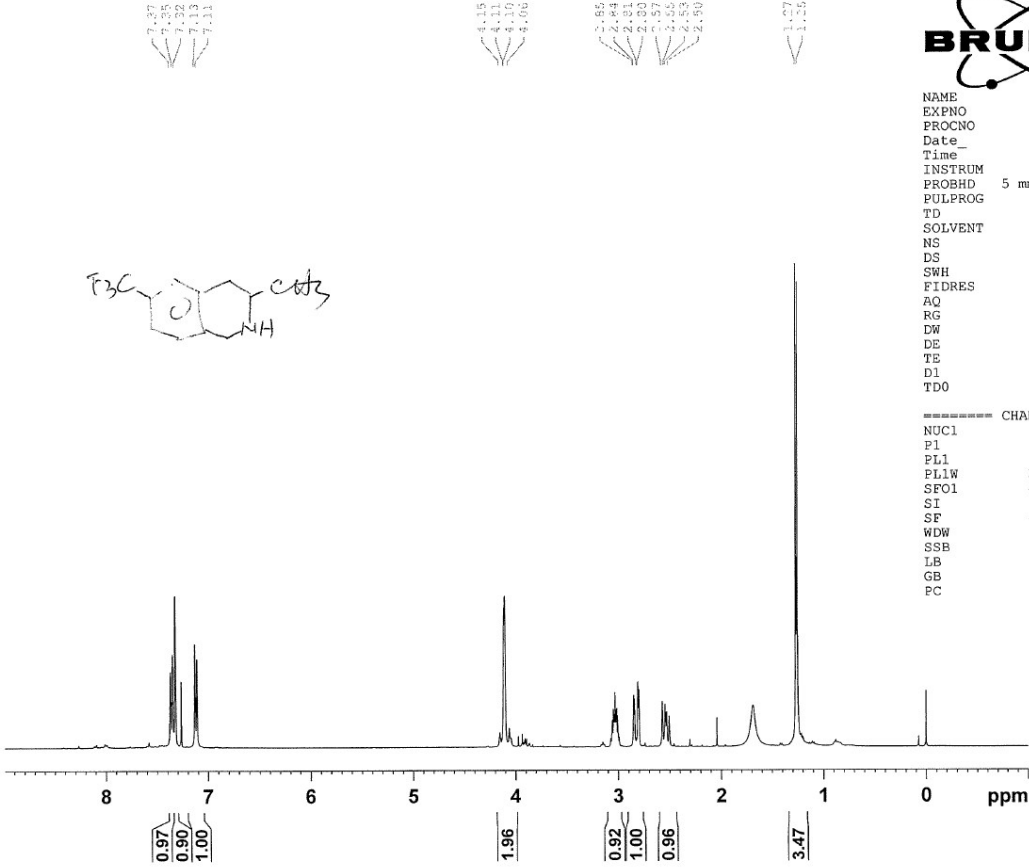

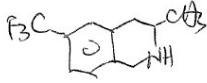

139.22  
137.72  
136.61  
128.20  
127.98  
126.03  
125.98  
122.94  
122.96  
122.50  
122.46  
122.43

49.03  
48.44  
29.15  
22.27

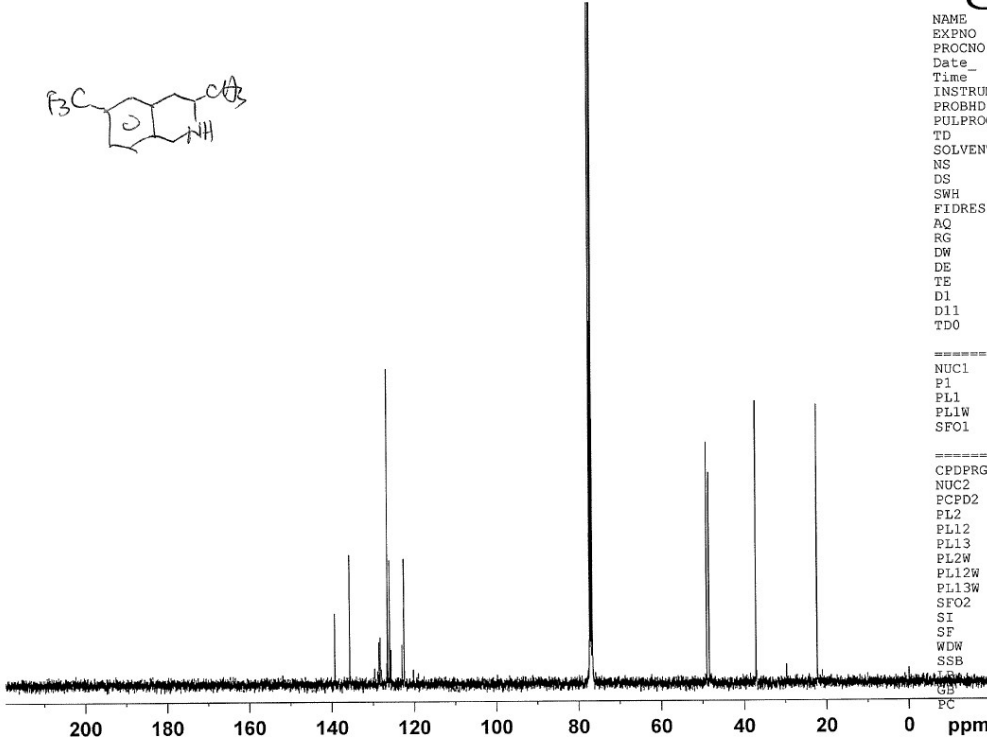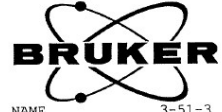

NAME 3-51-3  
EXPNO 5  
PROCNO 1  
Date\_ 20150905  
Time 23.53  
INSTRUM spect  
PROBHD 5 mm PABBO BB-  
PULPROG zgpg30  
TD 65536  
SOLVENT CDCl3  
NS 5000  
DS 4  
SWH 24038.461 Hz  
FIDRES 0.366798 Hz  
AQ 1.3631988 sec  
RG 2050  
DW 20.800 usec  
DE 6.50 usec  
TE 301.7 K  
D1 2.0000000 sec  
D11 0.0300000 sec  
TDO 1

==== CHANNEL f1 =====  
NUC1 13C  
P1 8.50 usec  
PL1 1.00 dB  
PL1W 75.02186584 W  
SFO1 100.6228298 MHz

==== CHANNEL f2 =====  
CPDPRG2 waltz16  
NUC2 1H  
PCPD2 90.00 usec  
PL2 -2.00 dB  
PL12 18.23 dB  
PL13 19.00 dB  
PL2W 31.17179108 W  
PL12W 0.29563907 W  
PL13W 0.24760634 W  
SFO2 400.1316005 MHz  
SI 32768  
SF 100.6127662 MHz  
WDW EM  
SSB 0  
LB 1.00 Hz  
GB 0  
PC 1.40

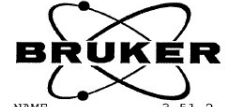

NAME 3-51-2  
EXFNO 1  
PROCNO 1  
Date 20150904  
Time 21.41  
INSTRUM spect  
PROBHD 5 mm PABBO BB-  
PULPROG zg30  
TD 65536  
SOLVENT CDCl3  
NS 16  
DS 2  
SWH 8223.685 Hz  
FIDRES 0.125493 Hz  
AQ 3.9846387 sec  
RG 203  
DW 60.800 usec  
DE 6.50 usec  
TE 301.8 K  
D1 1.00000000 sec  
TDO 1

----- CHANNEL f1 -----  
NUC1 1H  
P1 8.76 usec  
PL1 -2.00 dB  
PL1W 31.17179108 W  
SFO1 400.1324710 MHz  
SI 32768  
SF 400.1300100 MHz  
WDW EM  
SSB 0  
LB 0.30 Hz  
GB 0  
PC 1.00

7.17  
7.12  
7.08  
7.06  
7.05  
6.92  
6.56

4.22  
3.98  
3.82

2.97  
2.78  
2.75  
2.74  
2.53  
2.51  
2.49  
2.37

1.67  
1.25  
1.23

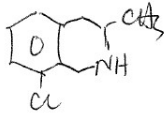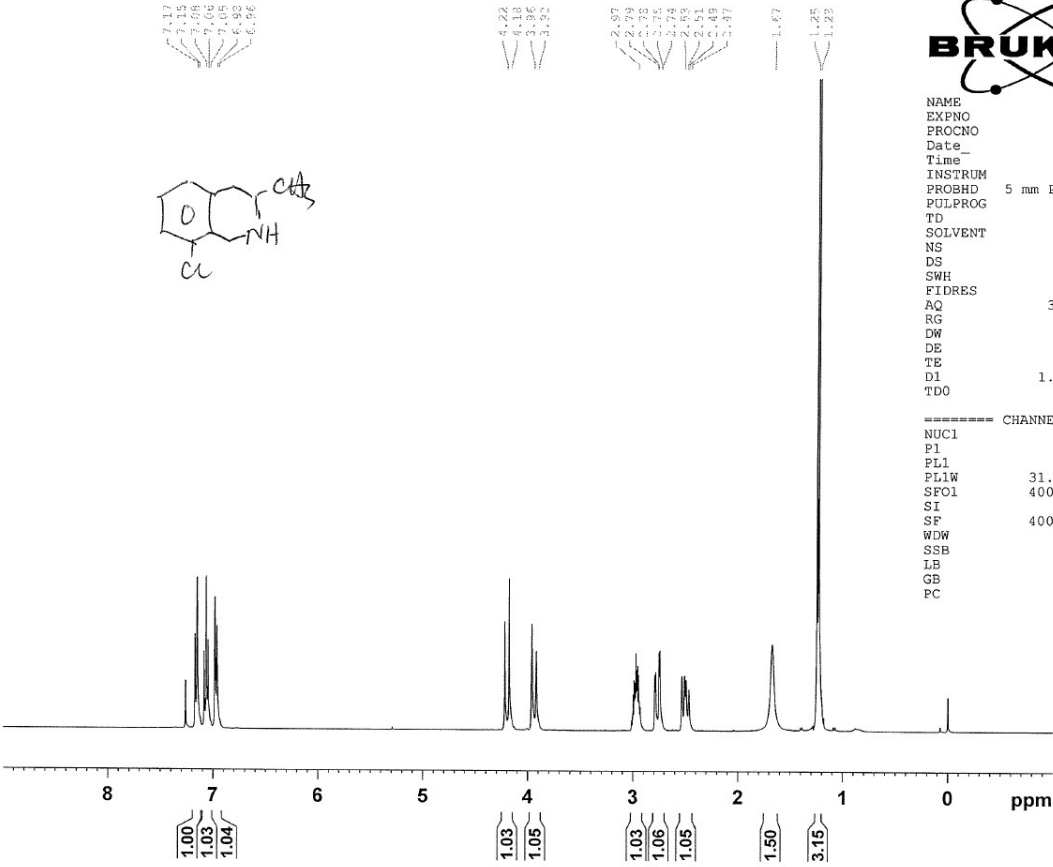

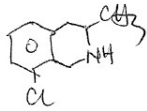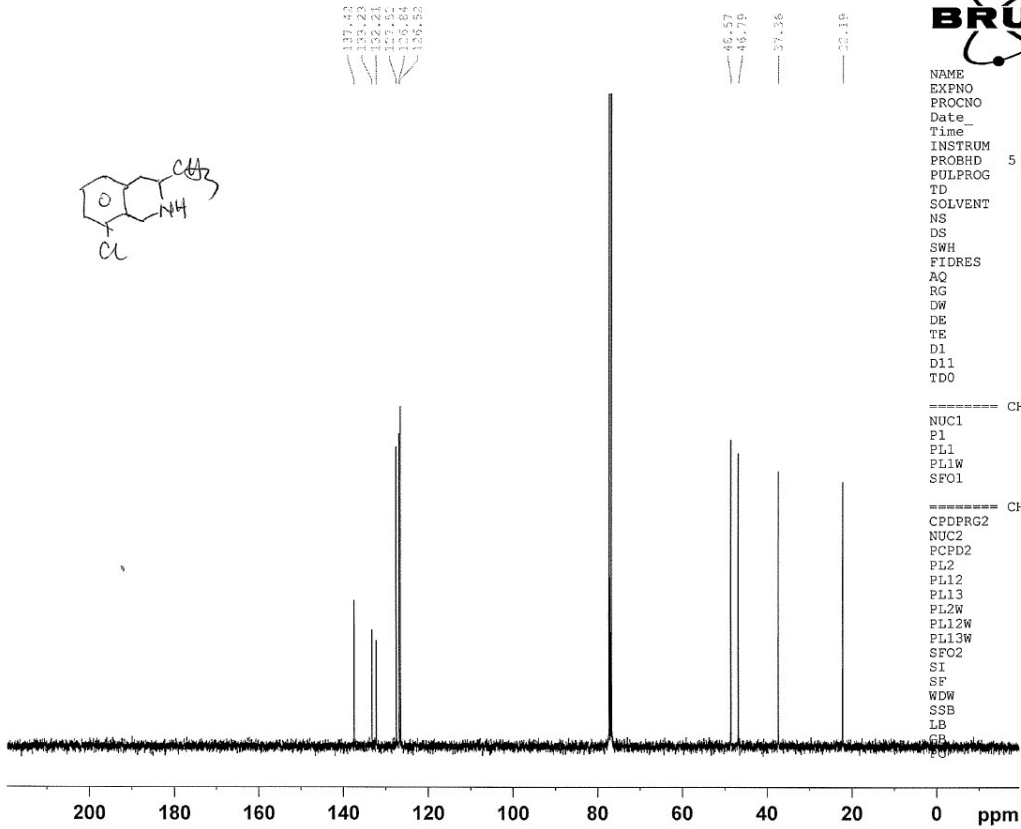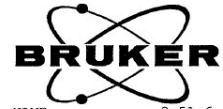

```

NAME      3-51-6
EXPNO     2
PROCNO    1
Date_     20150905
Time_     16.18
INSTRUM   spect
PROBHD    5 mm PABBO BB-
PULPROG   zgpg30
TD         65536
SOLVENT   CDCl3
NS         381
DS         2
SWH        24038.461 Hz
FIDRES     0.366798 Hz
AQ         1.3631988 sec
RG         2050
DW         20.800 usec
DE         6.50 usec
TE         301.7 K
D1         2.00000000 sec
D11        0.03000000 sec
TD0        1
  
```

```

----- CHANNEL f1 -----
NUC1      13C
P1        8.50 usec
PL1       1.00 dB
PL1W      75.02186584 W
SF01      100.6228298 MHz
  
```

```

----- CHANNEL f2 -----
CPDPRG2   waltz16
NUC2       1H
PCPD2     90.00 usec
PL2        -2.00 dB
PL12       18.23 dB
PL13       19.00 dB
PL2W      31.17179108 W
PL12W     0.29563907 W
PL13W     0.24760634 W
SF02      400.1316005 MHz
SI         32768
SF         100.6127690 MHz
WDW        EM
SSB         0
LB          1.00 Hz
GB          0
RG          1.40
  
```

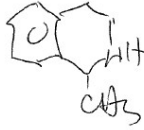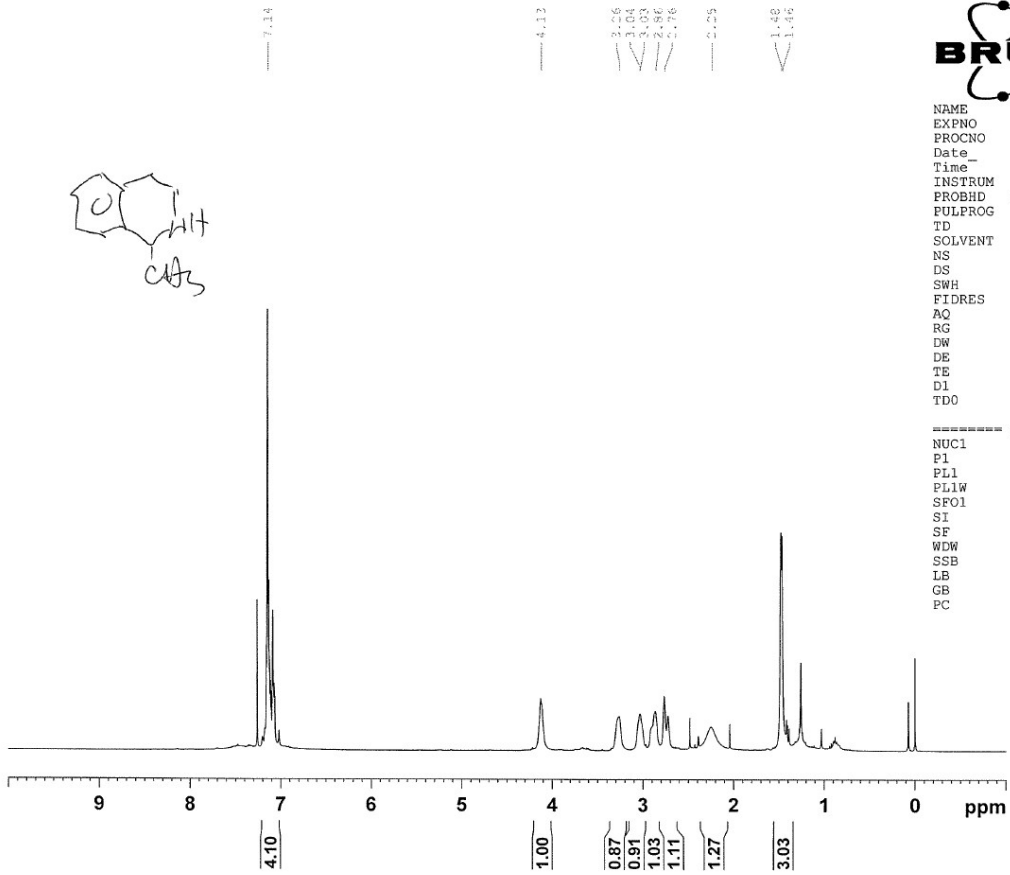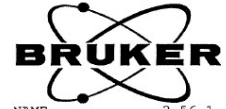

```

NAME          3-56-1
EXPNO         1
PROCNO        1
Date_         20150918
Time          5.29
INSTRUM       spect
PROBHD        5 mm PABBO BB-
PULPROG       zg30
TD            65536
SOLVENT       CDCl3
NS            16
DS            2
SWH           8223.685 Hz
FIDRES        0.125483 Hz
AQ            3.9846387 sec
RG            203
DW            60.800 usec
DE            6.50 usec
TE            299.4 K
D1            1.00000000 sec
TDO           1
  
```

```

===== CHANNEL f1 =====
NUC1           1H
P1             8.76 usec
PL1           -2.00 dB
PL1W          31.17179108 W
SFO1          400.1324710 MHz
SI            32768
SF            400.1300117 MHz
WDW            EM
SSB            0
LB            0.30 Hz
GB            0
PC            1.00
  
```





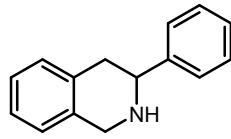

7.44  
7.42  
7.38  
7.36  
7.34  
7.28  
7.26  
7.14

4.28  
4.25  
4.18  
4.14  
4.02  
4.00  
3.98

2.98  
2.96

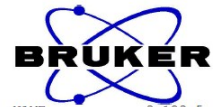

```

NAME          3-123-5
EXPNO         1
PROCNO        1
Date_         20160110
Time          20.02
INSTRUM       spect
PROBHD        5 mm PABBO BB-
PULPROG       zg30
TD            65536
SOLVENT       CDCl3
NS            16
DS            2
SWH           8223.685 Hz
FIDRES        0.125483 Hz
AQ            3.9846387 sec
RG            128
DW            60.800 usec
DE            6.50 usec
TE            299.1 K
D1            1.00000000 sec
TD0           1
  
```

```

----- CHANNEL f1 -----
NUC1          1H
P1            8.76 usec
PL1           -2.00 dB
PL1W          31.17179108 W
SFO1          400.1324710 MHz
SI            32768
SF            400.1300238 MHz
WDW           EM
SSB           0
LB            0.30 Hz
GB            0
PC            1.00
  
```

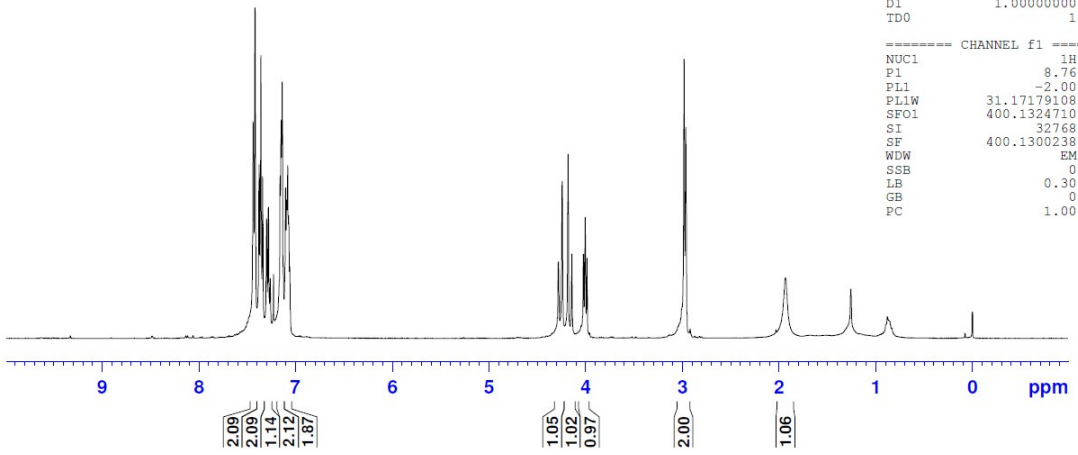

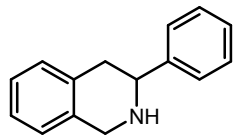

144.33  
135.04  
134.92  
129.10  
127.99  
127.99  
126.55  
126.26  
126.18  
125.90

58.61  
49.27  
37.73

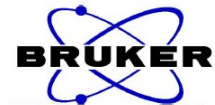

NAME 3-123-5  
EXPNO 2  
PROCNO 1  
Date\_ 20160111  
Time 12.45  
INSTRUM spect  
PROBHD 5 mm PABBO BB-  
PULPROG zgpg30  
TD 65536  
SOLVENT CDCl3  
NS 1000  
DS 2  
SWH 24038.461 Hz  
FIDRES 0.366798 Hz  
AQ 1.3631988 sec  
RG 2050  
DW 20.800 usec  
DE 6.50 usec  
TE 298.4 K  
D1 2.00000000 sec  
D11 0.03000000 sec  
TD0 1

===== CHANNEL f1 =====  
NUC1 13C  
P1 8.50 usec  
PL1 1.00 dB  
PL1W 75.02186584 W  
SFO1 100.6228298 MHz

===== CHANNEL f2 =====  
CPDPRG2 waltz16  
NUC2 1H  
PCPD2 90.00 usec  
PL2 -2.00 dB  
PL12 18.23 dB  
PL13 19.00 dB  
PL2W 31.17179108 W  
PL12W 0.29563907 W  
PL13W 0.24760634 W  
SFO2 400.1316005 MHz  
SI 32768  
SF 100.6127690 MHz  
WDW EM  
SSB 0  
LB 1.00 Hz  
GB 0  
PC 1.40

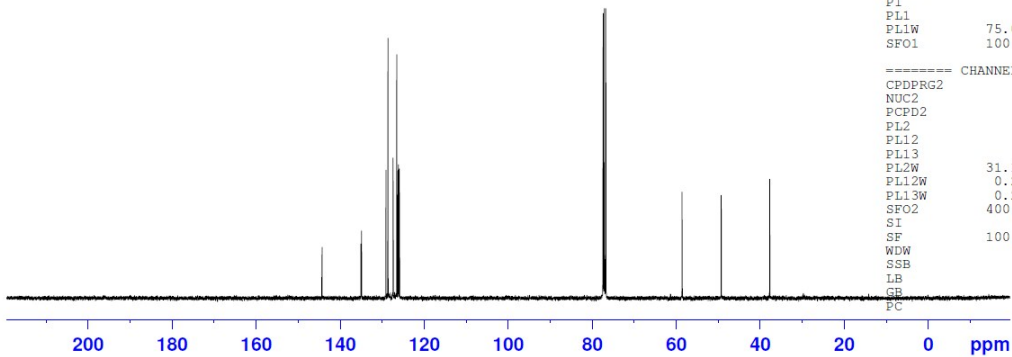

6.57  
6.55  
6.53  
6.61  
6.59  
6.57  
6.47  
6.45

3.59

2.93  
2.75

1.52

1.60

1.23  
1.13

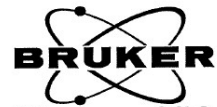

NAME 3-31-7  
EXPNO 1  
PROCNO 1  
Date\_ 20150618  
Time\_ 14.32  
INSTRUM spect  
PROBHD 5 mm PABBO BB-  
PULPROG zg30  
TD 65536  
SOLVENT CDCl3  
NS 16  
DS 2  
SWH 8223.685 Hz  
FIDRES 0.125483 Hz  
AQ 3.9846387 sec  
RG 128  
DW 60.800 usec  
DE 6.50 usec  
TE 298.1 K  
DI 1.00000000 sec  
TDO 1

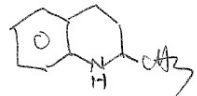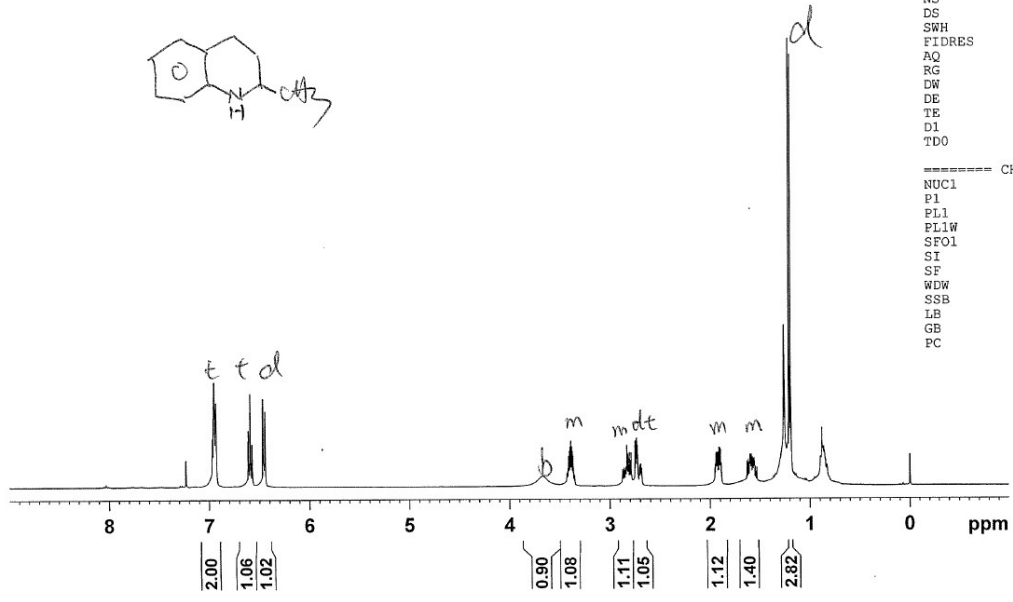

===== CHANNEL f1 =====  
NUC1 1H  
P1 8.76 usec  
PL1 -2.00 dB  
PL1W 31.17179108 W  
SFO1 400.1324710 MHz  
SI 32768  
SF 400.1300203 MHz  
WDB EM  
SSB 0  
LB 0.30 Hz  
GB 0  
PC 1.00

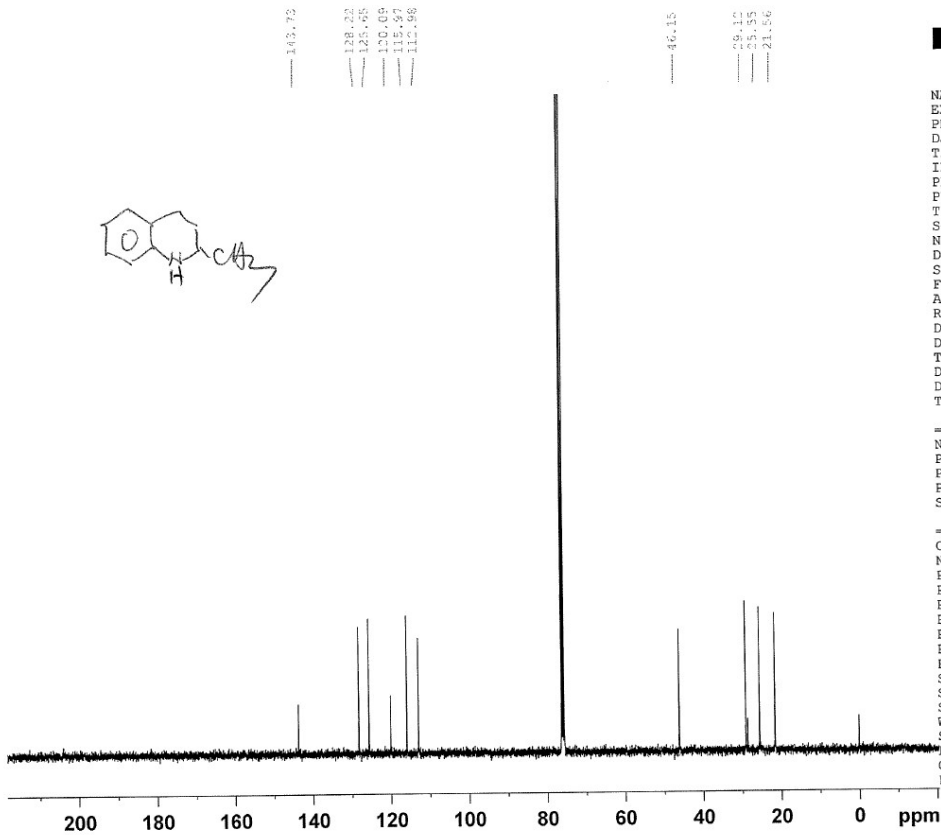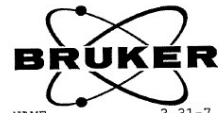

```

NAME          3-31-7
EXPNO         3
PROCNO        1
Date_         20150822
Time_         1.48
INSTRUM       spect
PROBHD        5 mm PABBO BB-
PULPROG       zgpg30
TD            65536
SOLVENT       CDCl3
NS            1024
DS            4
SWH           24038.461 Hz
FIDRES        0.366798 Hz
AQ            1.3631988 sec
RG            2050
DW            20.800 usec
DE            6.50 usec
TE            303.1 K
D1            2.0000000 sec
D11           0.0300000 sec
TD0           1
  
```

```

===== CHANNEL f1 =====
NUC1          13C
P1            8.50 usec
PL1           1.00 dB
PL1W         75.02186584 W
SF01          100.6228298 MHz
  
```

```

===== CHANNEL f2 =====
CPDPRG2      waltz16
NUC2          1H
PCPD2        90.00 usec
PL2           -2.00 dB
PL12         18.23 dB
PL13         19.00 dB
PL12W        31.17179108 W
PL12W        0.29563907 W
PL13W        0.24760634 W
SFO2          400.1316005 MHz
SI            32768
SF            100.6128727 MHz
WDW           EM
SSB           0
LB            1.00 Hz
GB            0
PC            1.40
  
```

6.97  
6.95  
6.93  
6.80  
6.59  
6.57  
6.48  
6.46

3.76

3.17

2.74

1.96

1.84

1.82

1.50

1.48

1.00

0.98

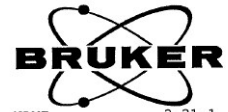

NAME 3-31-1  
 EXPNO 1  
 PROCNO 1  
 Date\_ 20150618  
 Time\_ 13.50  
 INSTRUM spect  
 PROBHD 5 mm PABBO BB-  
 PULPROG zg30  
 TD 65536  
 SOLVENT CDC13  
 NS 16  
 DS 2  
 SWH 8223.685 Hz  
 FIDRES 0.125483 Hz  
 AQ 3.9846387 sec  
 RG 128  
 DW 60.800 usec  
 DE 6.50 usec  
 TE 299.1 K  
 D1 1.00000000 sec  
 TDO 1

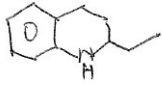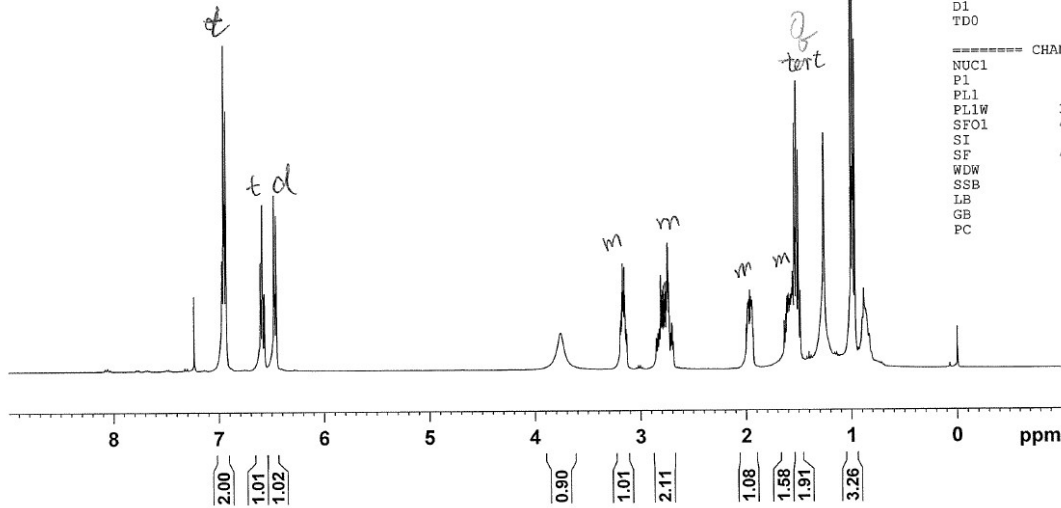

===== CHANNEL f1 =====  
 NUC1 1H  
 P1 8.76 usec  
 PL1 -2.00 dB  
 PL1W 31.17179108 W  
 SFO1 400.1324710 MHz  
 SI 32768  
 SF 400.1300197 MHz  
 WDW EM  
 SSB 0  
 LB 0.30 Hz  
 GB 0  
 PC 1.00

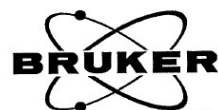

NAME 3-31-1  
EXPNO 3  
PROCNO 1  
Date\_ 20150821  
Time 21.22  
INSTRUM spect  
PROBHD 5 mm PABBO BB-  
PULPROG zgpg30  
TD 65536  
SOLVENT CDC13  
NS 1024  
DS 4  
SWH 24038.461 Hz  
FIDRES 0.366798 Hz  
AQ 1.3631988 sec  
RG 2050  
DW 20.800 usec  
DE 6.50 usec  
TE 303.6 K  
D1 2.0000000 sec  
D11 0.0300000 sec  
TDO 1

===== CHANNEL f1 =====  
NUC1 13C  
P1 8.50 usec  
PL1 1.00 dB  
PL1W 75.02186584 W  
SFO1 100.6228298 MHz

===== CHANNEL f2 =====  
CPDPRG2 waltz16  
NUC2 1H  
PCPD2 90.00 usec  
PL2 -2.00 dB  
PL12 18.23 dB  
PL13 19.00 dB  
PL2W 31.17179108 W  
PL12W 0.29563907 W  
PL13W 0.24760634 W  
SFO2 400.1316005 MHz  
SI 32768  
SF 100.6128738 MHz  
WDW EM  
SSB 0  
LB 1.00 Hz  
GB 0  
PC 1.40

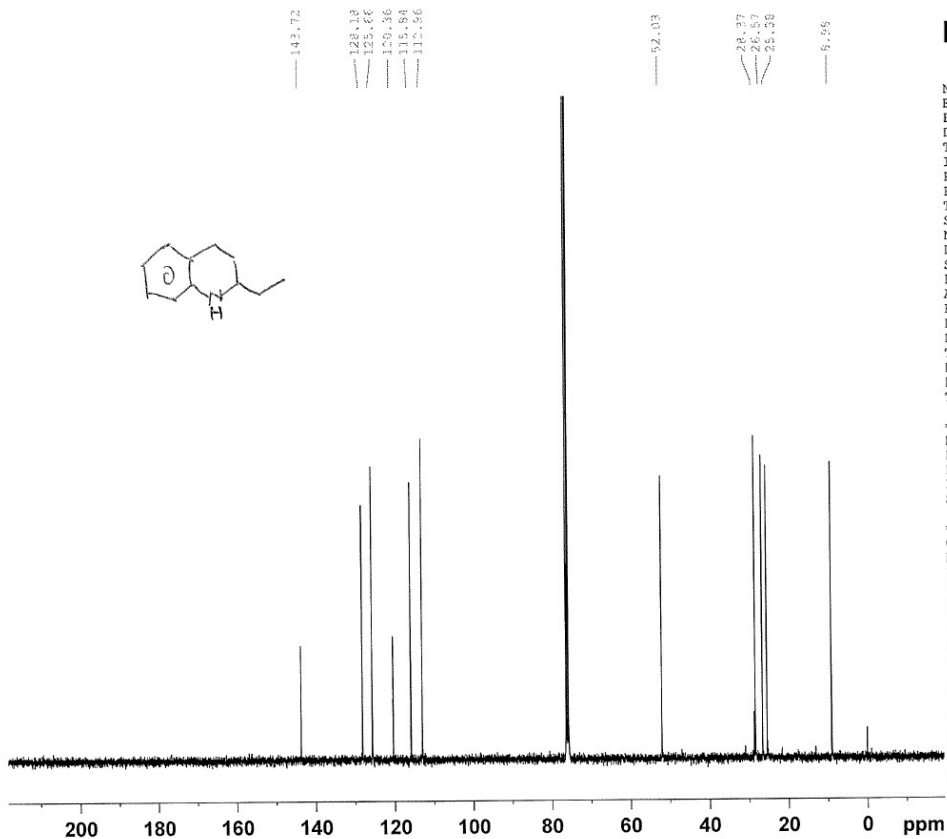

6.97  
6.95  
6.93  
6.60  
6.58  
6.56  
6.54

3.65  
2.75

1.91  
1.68

1.00  
0.98  
0.97  
0.95

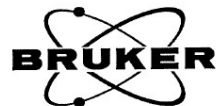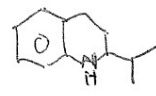

NAME 3-31-2  
EXPNO 2  
PROCNO 1  
Date\_ 20150821  
Time\_ 21.28  
INSTRUM spect  
PROBHD 5 mm PABBO BB-  
PULPROG zg30  
TD 65536  
SOLVENT CDCl3  
NS 16  
DS 2  
SWH 8223.685 Hz  
FIDRES 0.125483 Hz  
AQ 3.9846387 sec  
RG 161  
DW 60.800 usec  
DE 6.50 usec  
TE 302.3 K  
D1 1.00000000 sec  
TDO 1

===== CHANNEL f1 =====  
NUC1 1H  
P1 8.76 usec  
PL1 -2.00 dB  
PL1W 31.17179108 W  
SFO1 400.1324710 MHz  
SI 32768  
SF 400.1300169 MHz  
WDW EM  
SSB 0  
LB 0.30 Hz  
GB 0  
PC 1.00

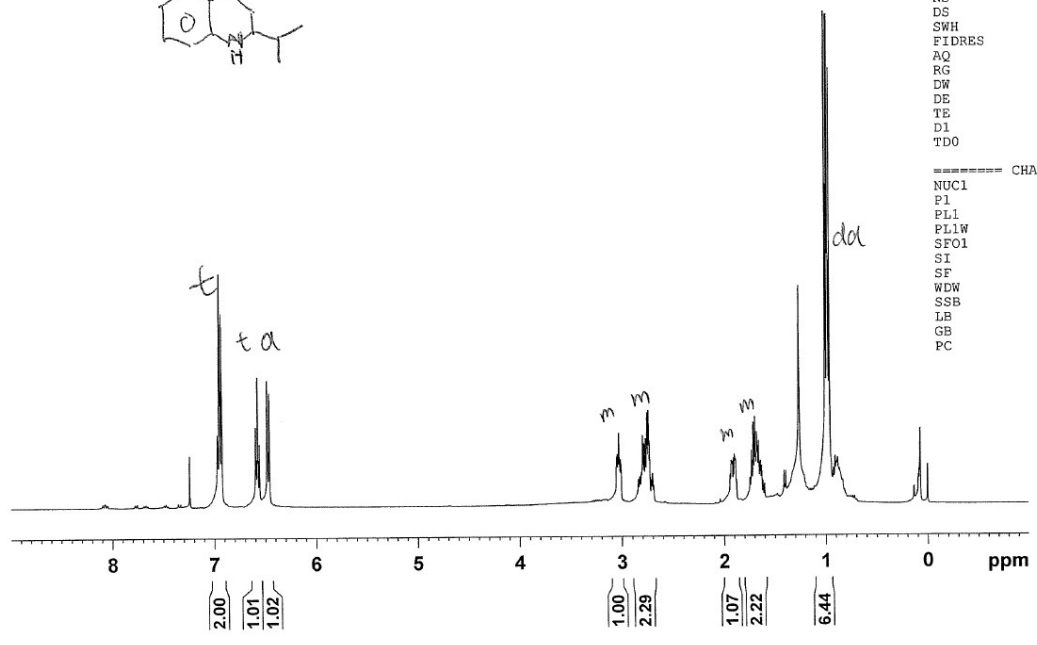

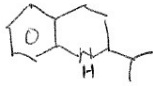

----- 144.00  
 ----- 126.06  
 ----- 125.66  
 ----- 126.40  
 ----- 115.70  
 ----- 112.03  
 ----- 56.29  
 ----- 31.51  
 ----- 25.61  
 ----- 21.53  
 ----- 17.22

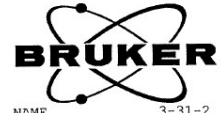

NAME 3-31-2  
 EXPNO 3  
 PROCNO 1  
 Date\_ 20150821  
 Time 22.29  
 INSTRUM spect  
 PROBHD 5 mm PABBO BB-  
 PULPROG zgpg30  
 TD 65536  
 SOLVENT CDCl3  
 NS 1024  
 DS 4  
 SWH 24038.461 Hz  
 FIDRES 0.366798 Hz  
 AQ 1.3631988 sec  
 RG 2050  
 DW 20.800 usec  
 DE 6.50 usec  
 TE 303.5 K  
 D1 2.00000000 sec  
 D11 0.03000000 sec  
 TD0 1

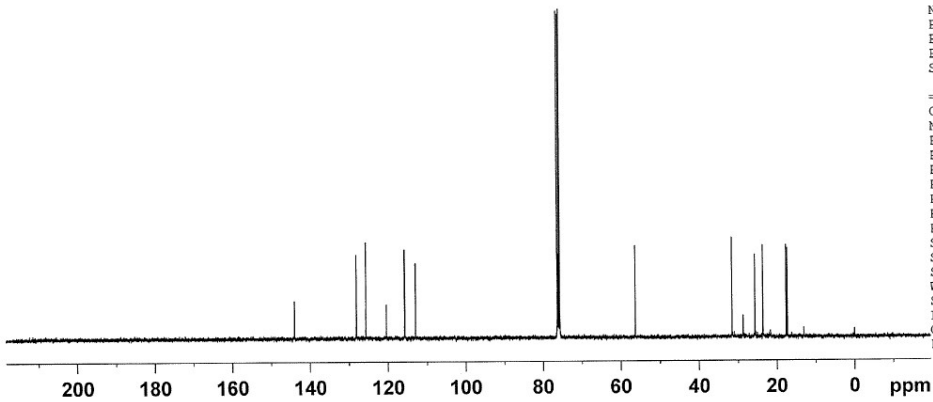

===== CHANNEL f1 =====  
 NUC1 13C  
 P1 8.50 usec  
 PL1 1.00 dB  
 PL1W 75.02186584 W  
 SFO1 100.6228298 MHz

===== CHANNEL f2 =====  
 CPDPRG2 waltz16  
 NUC2 1H  
 PCPD2 90.00 usec  
 PL2 -2.00 dB  
 PL12 18.23 dB  
 PL13 19.00 dB  
 PL2W 31.17179108 W  
 PL12W 0.29563907 W  
 PL13W 0.24760634 W  
 SFO2 400.1316005 MHz  
 SI 32768  
 SF 100.6128734 MHz  
 WDW EM  
 SSB 0  
 LB 1.00 Hz  
 GB 0  
 PC 1.40



6.92  
6.95  
6.97  
6.98  
6.98  
6.98  
6.97  
6.95

3.75  
3.22  
2.73

1.95  
1.63  
1.43  
1.47  
1.45  
1.33  
0.92  
0.90  
0.89

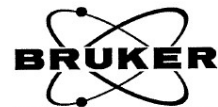

NAME 3-31-3  
EXPNO 1  
PROCNO 1  
Date\_ 20150618  
Time 14.04  
INSTRUM spect  
PROBHD 5 mm PABBO BB-  
PULPROG zg30  
TD 65536  
SOLVENT CDCl3  
NS 16  
DS 2  
SWH 8223.685 Hz  
FIDRES 0.125483 Hz  
AQ 3.9846387 sec  
RG 57  
DW 60.800 usec  
DE 6.50 usec  
TE 298.8 K  
D1 1.0000000 sec  
TDO 1

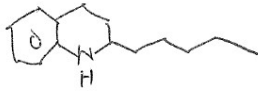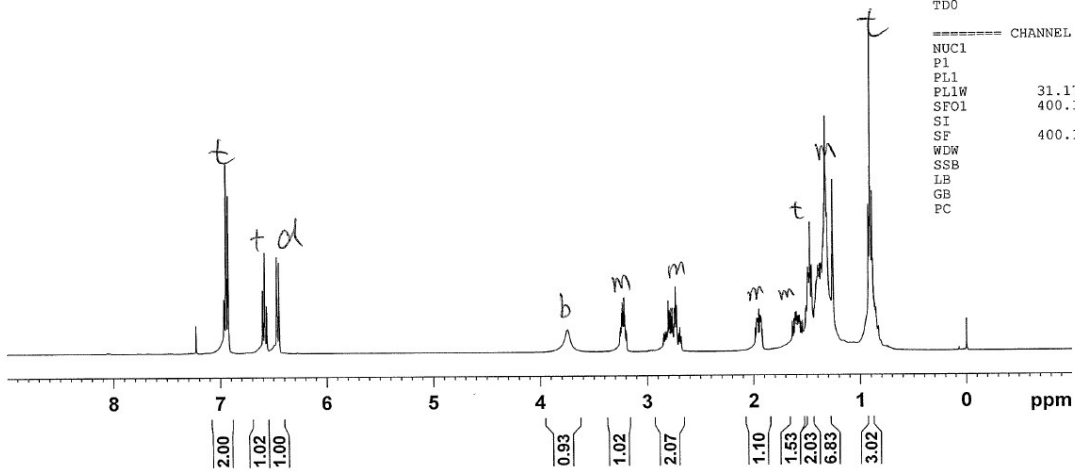

===== CHANNEL f1 =====  
NUC1 1H  
P1 8.76 usec  
PL1 -2.00 dB  
PL1W 31.17179108 W  
SFO1 400.1324710 MHz  
SI 32768  
SF 400.1300218 MHz  
WDW EM  
SSB 0  
LB 0.30 Hz  
GB 0  
PC 1.00

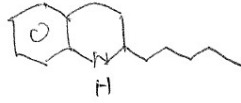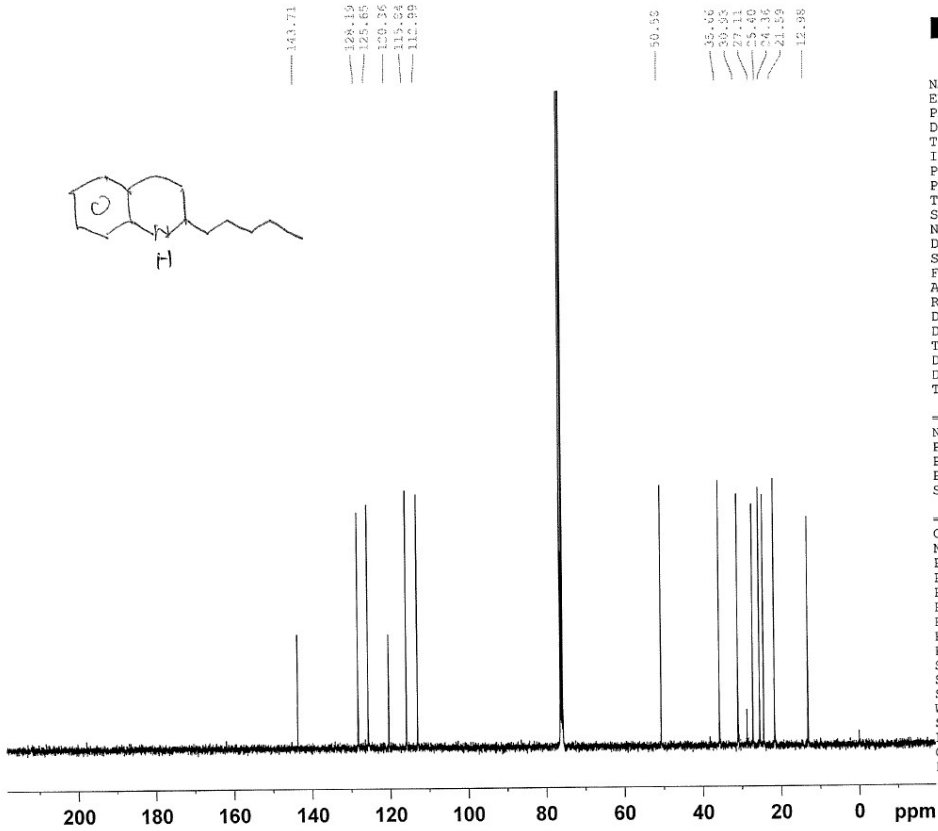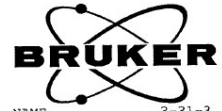

```

NAME      3-31-3
EXPNO     3
PROCNO    1
Date_     20150821
Time      23.37
INSTRUM   spect
PROBHD    5 mm PABBO BB-
PULPROG   zgpg30
TD         65536
SOLVENT   CDCl3
NS         1024
DS         4
SWH        24038.461 Hz
FIDRES     0.366798 Hz
AQ         1.3631988 sec
RG         2050
DW         20.800 usec
DE         6.50 usec
TE         303.4 K
D1         2.00000000 sec
D11        0.03000000 sec
TDO        1
  
```

```

===== CHANNEL f1 =====
NUC1      13C
P1        8.50 usec
PL1       1.00 dB
PL1W      75.02186584 W
SFO1      100.6228298 MHz
  
```

```

===== CHANNEL f2 =====
CPDPRG2   waltz16
NUC2      1H
PCPD2     90.00 usec
PL2       -2.00 dB
PL12      18.23 dB
PL13      19.00 dB
PL2W      31.17179108 W
PL12W     0.29563907 W
PL13W     0.24760634 W
SFO2      400.1316005 MHz
SI         32768
SF         100.6128741 MHz
WDW        EM
SSB        0
LB         1.00 Hz
GB         0
PC         1.40
  
```



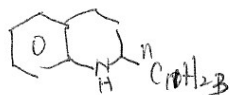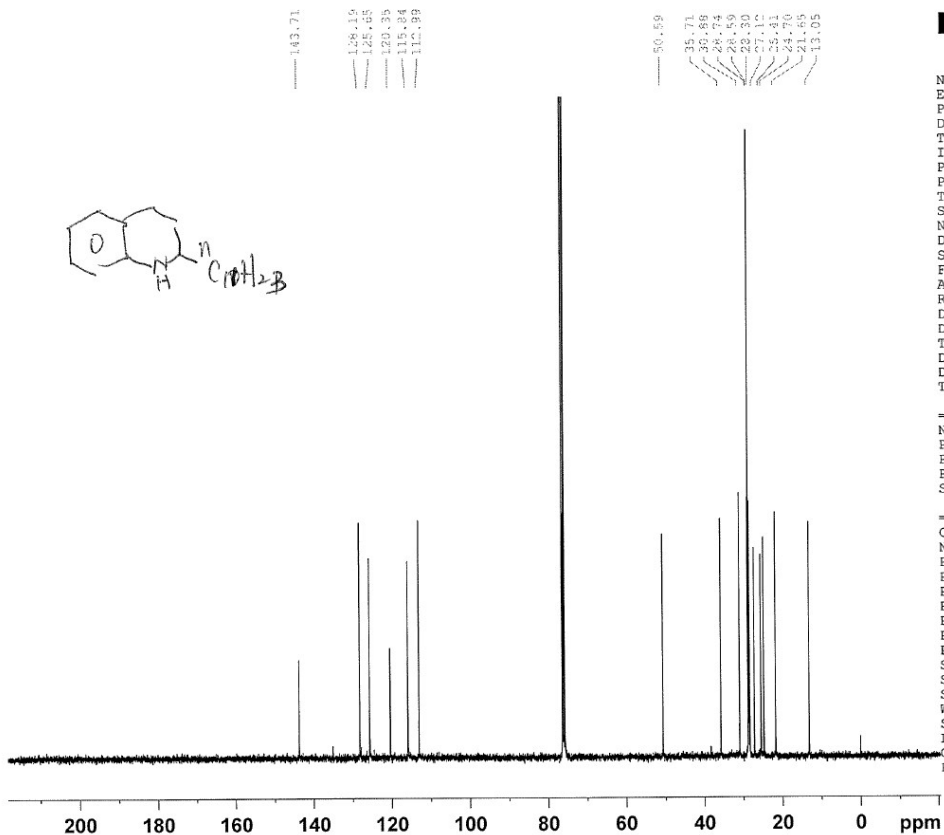

143.71  
 128.16  
 125.65  
 120.35  
 115.84  
 111.88  
 50.59  
 35.71  
 34.84  
 34.74  
 28.59  
 23.30  
 27.12  
 25.41  
 24.70  
 21.65  
 13.05

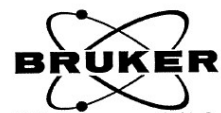

NAME 3-31-5  
 EXPNO 3  
 PROCNO 1  
 Date\_ 20150822  
 Time 0.43  
 INSTRUM spect  
 PROBHD 5 mm PABBO BB-  
 PULPROG zgpg30  
 TD 65536  
 SOLVENT CDCl3  
 NS 1024  
 DS 4  
 SWH 24038.461 Hz  
 FIDRES 0.366798 Hz  
 AQ 1.3631988 sec  
 RG 2050  
 DW 20.800 usec  
 DE 6.50 usec  
 TE 303.3 K  
 D1 2.0000000 sec  
 D11 0.0300000 sec  
 TDO 1

===== CHANNEL f1 =====  
 NUC1 13C  
 P1 8.50 usec  
 PL1 1.00 dB  
 PL1W 75.02186584 W  
 SF01 100.6228298 MHz

===== CHANNEL f2 =====  
 CPDPRG2 waltz16  
 NUC2 1H  
 PCPD2 90.00 usec  
 PL2 -2.00 dB  
 PL12 18.23 dB  
 PL13 19.00 dB  
 PL2W 31.17179108 W  
 PL12W 0.29563907 W  
 PL13W 0.24760634 W  
 SFO2 400.1316005 MHz  
 SI 32768  
 SF 100.6128738 MHz  
 WDW EM  
 SSB 0  
 LB 1.00 Hz  
 GB 0  
 PC 1.40

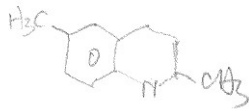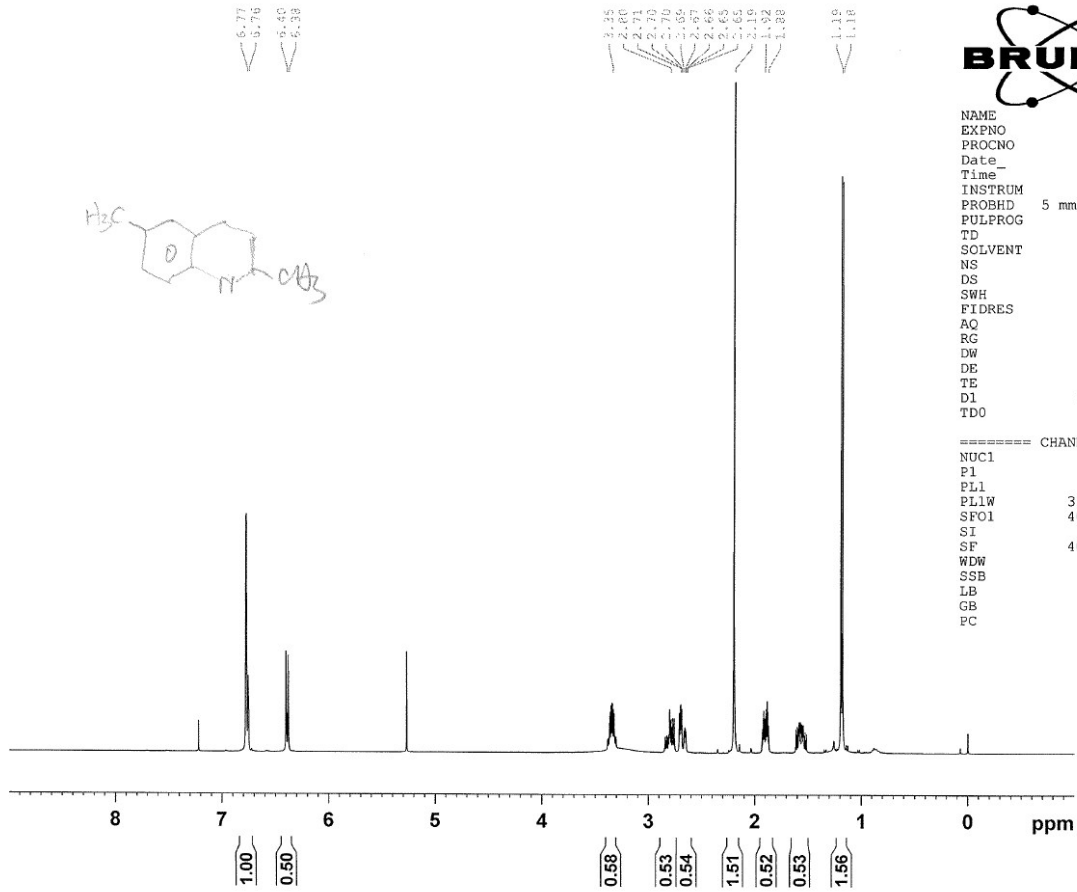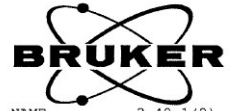

```

NAME      3-49-1(2)
EXPNO     3
PROCNO    1
Date_     20150904
Time      13.45
INSTRUM   spect
PROBHD    5 mm PABBO BB-
PULPROG   zg30
TD         65536
SOLVENT   CDCl3
NS         16
DS         2
SWH        8223.685 Hz
FIDRES     0.125483 Hz
AQ         3.9846387 sec
RG         71.8
DW         60.800 usec
DE         6.50 usec
TE         301.8 K
D1         1.00000000 sec
TD0        1

===== CHANNEL f1 =====
NUC1       1H
P1         8.76 usec
PL1        -2.00 dB
PL1W       31.17179108 W
SF01       400.1324710 MHz
SI         32768
SF         400.1300260 MHz
WDW        EM
SSB        0
LB         0.30 Hz
GB         0
PC         1.00
  
```

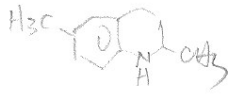

142.46  
 136.83  
 127.24  
 124.28  
 119.28  
 118.77  
 87.35  
 30.39  
 26.59  
 22.59  
 20.48

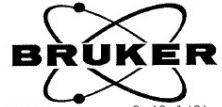

NAME 3-49-1 (2)  
 EXPNO 2  
 PROCNO 1  
 Date\_ 20150903  
 Time\_ 19.55  
 INSTRUM spect  
 PROBHD 5 mm PABBO BB-  
 PULPROG zgpg30  
 TD 65536  
 SOLVENT CDC13  
 NS 1000  
 DS 2  
 SWH 24038.461 Hz  
 FIDRES 0.366798 Hz  
 AQ 1.3631988 sec  
 RG 2050  
 DW 20.800 usec  
 DE 6.50 usec  
 TE 303.9 K  
 DI 2.00000000 sec  
 D11 0.03000000 sec  
 TD0 1

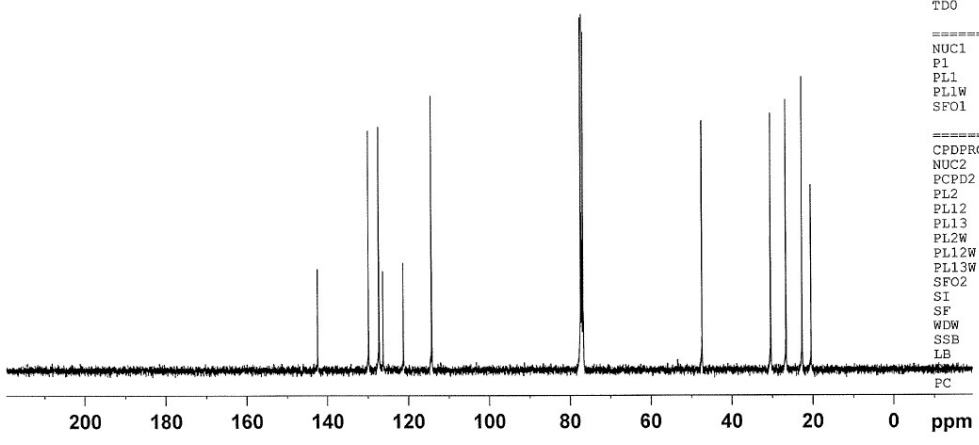

===== CHANNEL f1 =====  
 NUC1 13C  
 P1 8.50 usec  
 PL1 1.00 dB  
 PL1W 75.02186584 W  
 SFO1 100.6228298 MHz  
 ===== CHANNEL f2 =====  
 CPDPRG2 waltz16  
 NUC2 1H  
 PCPD2 90.00 usec  
 PL2 -2.00 dB  
 PL12 18.23 dB  
 PL13 19.00 dB  
 PL2W 31.17179108 W  
 PL12W 0.29563907 W  
 PL13W 0.24760634 W  
 SFO2 400.1316005 MHz  
 SI 32768  
 SF 100.6127690 MHz  
 WDW EM  
 SSB 0  
 LB 1.00 Hz  
 0  
 PC 1.40

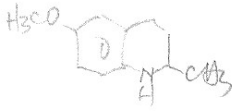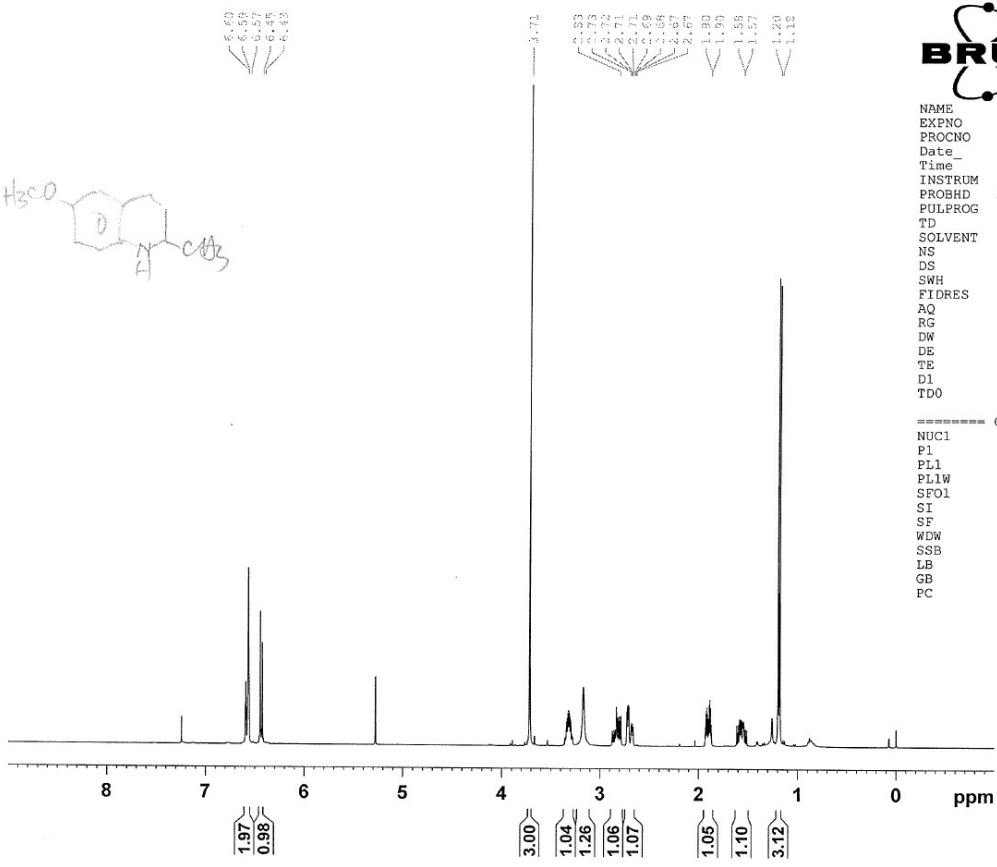

6.60  
6.59  
6.57  
6.45  
6.43

3.71

3.53  
3.43  
3.32  
3.22  
2.71  
2.69  
2.58  
2.47  
2.17  
1.90  
1.90  
1.56  
1.57  
1.29  
1.16

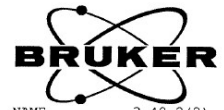

NAME 3-49-2(2)  
EXPNO 3  
PROCNO 1  
Date\_ 20150904  
Time 13.52  
INSTRUM spect  
PROBHD 5 mm PABBO BB-  
PULPROG zg30  
TD 65536  
SOLVENT CDCl3  
NS 16  
DS 2  
SWH 8223.685 Hz  
FIDRES 0.125483 Hz  
AQ 3.9846387 sec  
RG 80.6  
DW 60.800 usec  
DE 6.50 usec  
TE 301.7 K  
D1 1.00000000 sec  
TD0 1

===== CHANNEL f1 =====  
NUC1 1H  
P1 8.76 usec  
PL1 -2.00 dB  
PL1W 31.17179108 W  
SF01 400.1324710 MHz  
SI 32768  
SF 400.1300171 MHz  
WDW EM  
SSB 0  
LB 0.30 Hz  
GB 0  
PC 1.00

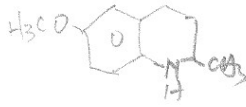

-----153.92  
 -----138.82  
 -----122.82  
 -----116.53  
 -----114.22  
 -----112.91  
 -----55.83  
 -----47.50  
 -----20.34  
 -----25.91  
 -----22.54

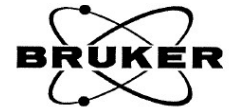

```

NAME      3-49-2 (2)
EXPNO    2
PROCNO   1
Date_    20150903
Time     20.24
INSTRUM  spect
PROBHD   5 mm PABBO BB-
PULPROG  zgpg30
TD       65536
SOLVENT  CDCl3
NS       1000
DS       2
SWH      24038.461 Hz
FIDRES   0.366798 Hz
AQ       1.3631988 sec
RG       2050
DW       20.800 usec
DE       6.50 usec
TE       303.8 K
D1       2.00000000 sec
D11      0.03000000 sec
TD0      1
  
```

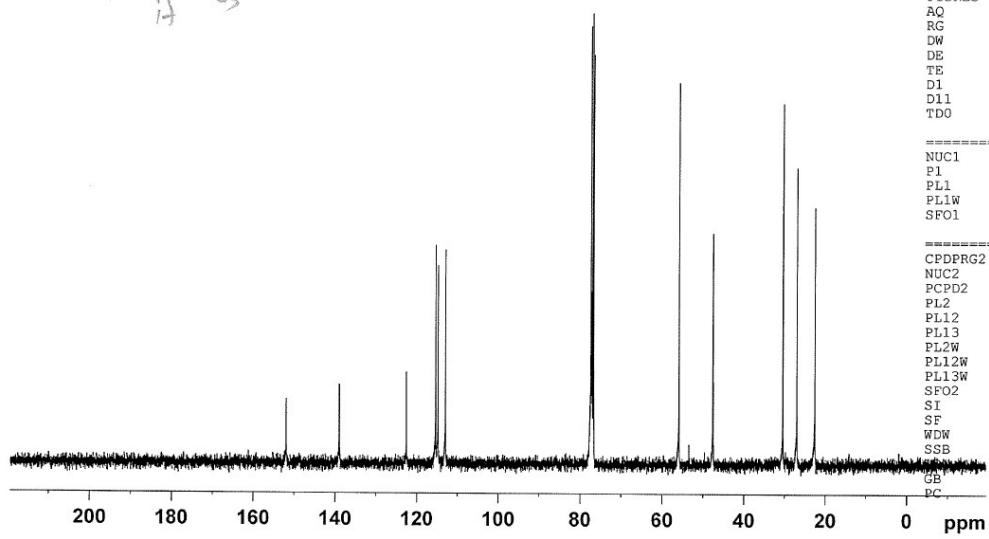

```

===== CHANNEL f1 =====
NUC1     13C
P1       8.50 usec
PL1      1.00 dB
PL1W     75.02186584 W
SFO1     100.6228298 MHz

===== CHANNEL f2 =====
CPDPRG2  waltz16
NUC2     1H
PCPD2    90.00 usec
PL2      -2.00 dB
PL12     18.23 dB
PL13     19.00 dB
PL2W     31.17179108 W
PL12W    0.29563907 W
PL13W    0.24760634 W
SFO2     400.1316005 MHz
SI       32768
SF       100.6127690 MHz
WDW      EM
SSB      0
GB       1.00 Hz
CB       0
PC       1.40
  
```



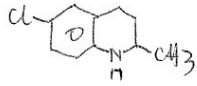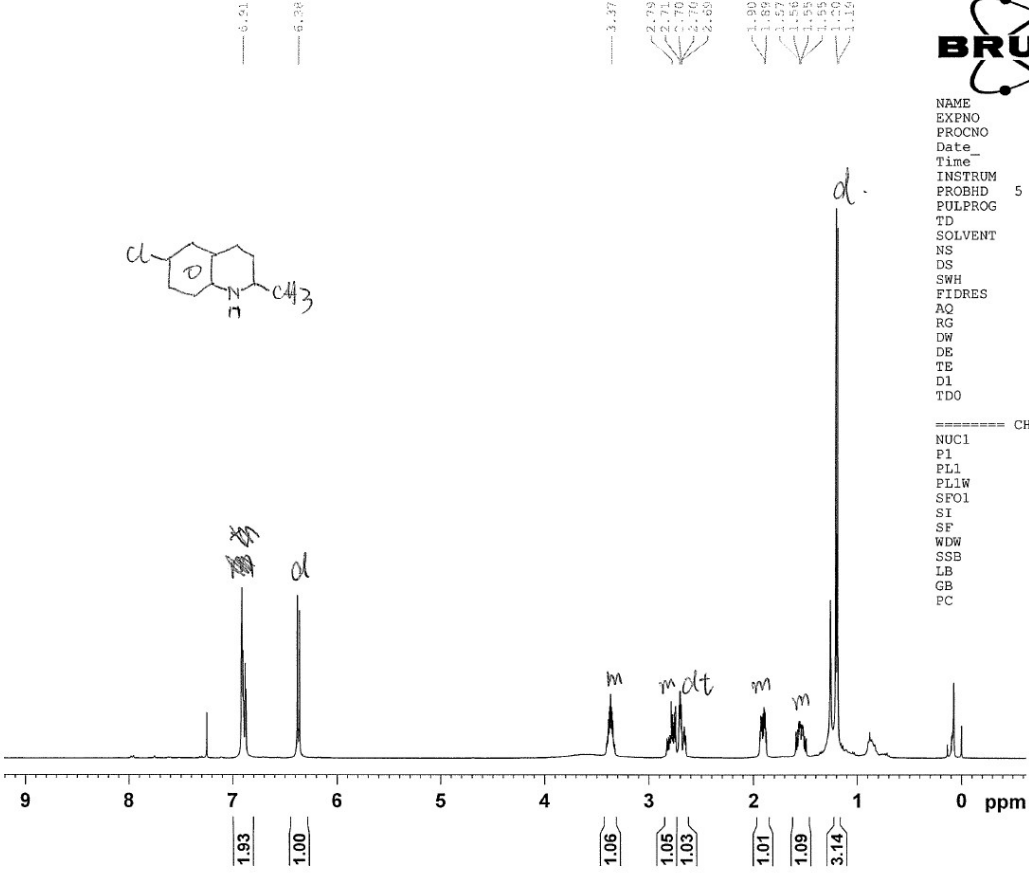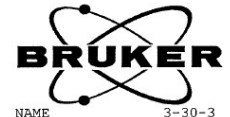

NAME 3-30-3  
 EXPNO 2  
 PROCNO 1  
 Date 20150821  
 Time 12.37  
 INSTRUM spect  
 PROBHD 5 mm PABBO BB-  
 PULPROG zg30  
 TD 65536  
 SOLVENT CDCl3  
 NS 32  
 DS 2  
 SWH 8223.685 Hz  
 FIDRES 0.125483 Hz  
 AQ 3.9846387 sec  
 RG 161  
 DW 60.800 usec  
 DE 6.50 usec  
 TE 301.4 K  
 D1 1.00000000 sec  
 TDO 1

===== CHANNEL f1 =====  
 NUC1 1H  
 P1 8.76 usec  
 PL1 -2.00 dB  
 PLLW 31.17179108 W  
 SFO1 400.1324710 MHz  
 SI 32768  
 SF 400.1300144 MHz  
 WDW EM  
 SSB 0  
 LB 0.30 Hz  
 GB 0  
 PC 1.00

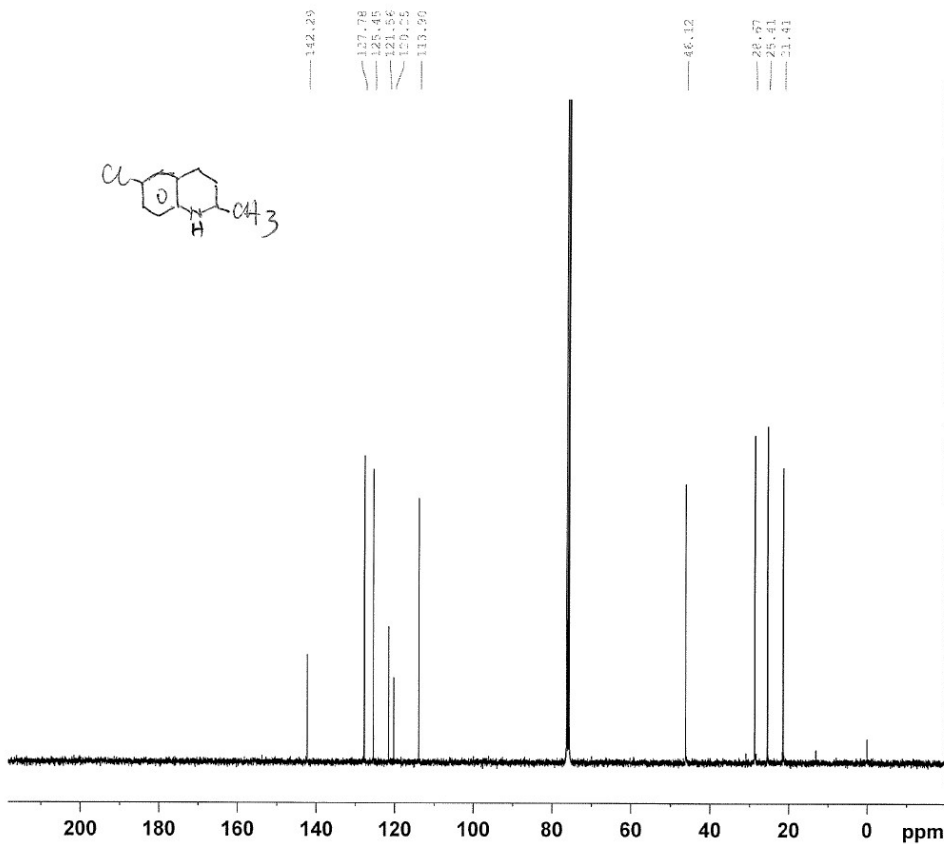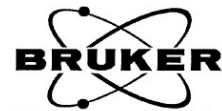

```

NAME          3-30-3
EXPNO         3
PROCNO        1
Date_         20150821
Time_         13.24
INSTRUM       spect
PROBHD        5 mm PABBO BB-
PULPROG       zgpg30
TD            65536
SOLVENT       CDCl3
NS            1000
DS            2
SWH           24038.461 Hz
FIDRES        0.366798 Hz
AQ            1.3631988 sec
RG            2050
DW            20.800 usec
DE            6.50 usec
TE            303.1 K
D1            2.0000000 sec
D11           0.0300000 sec
TDO           1
  
```

```

===== CHANNEL f1 =====
NUC1          13C
P1            8.50 usec
PL1           1.00 dB
PL1W          75.02186584 W
SF01          100.6228298 MHz
  
```

```

===== CHANNEL f2 =====
CPDPRG2       waltz16
NUC2           1H
PCPD2         90.00 usec
PL2           -2.00 dB
PL12          18.23 dB
PL13          19.00 dB
PL2W          31.17179108 W
PL12W         0.29563907 W
PL13W         0.24760634 W
SF02          400.1316005 MHz
SI            32768
SF            100.6128729 MHz
WDW           EM
SSB           0
LB            1.00 Hz
GB            0
PC            1.40
  
```

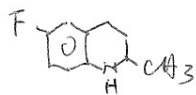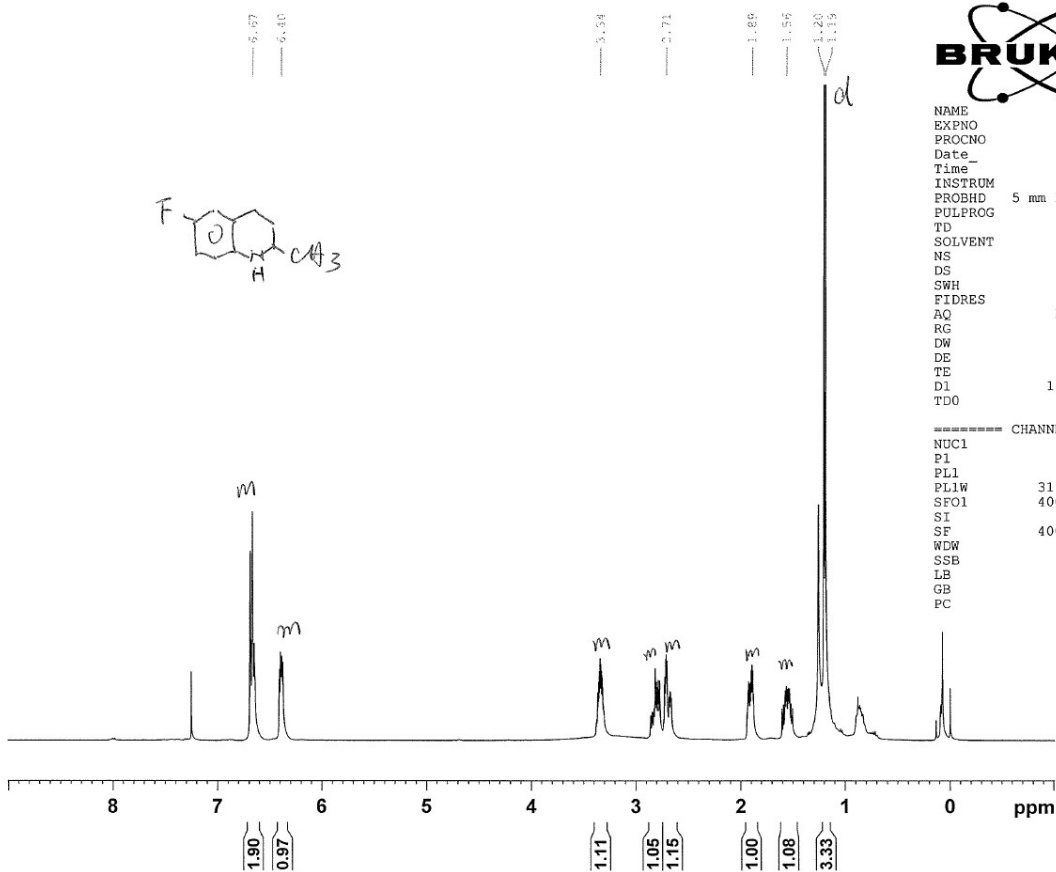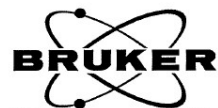

```

NAME      3-30-4
EXPNO     2
PROCNO    1
Date_     20150821
Time      13.45
INSTRUM   spect
PROBHD    5 mm PABBO BB-
PULPROG   zg30
TD         65536
SOLVENT   CDC13
NS         32
DS         2
SWH       8223.685 Hz
FIDRES    0.125483 Hz
AQ         3.9846387 sec
RG         203
DW         60.800 usec
DE         6.50 usec
TE         301.8 K
D1         1.00000000 sec
TD0        1
  
```

```

===== CHANNEL f1 =====
NUC1      1H
P1         8.76 usec
PL1       -2.00 dB
PL1W      31.17179108 W
SFO1      400.1324710 MHz
SI         32768
SF         400.1300139 MHz
WDW        EM
SSB         0
LB         0.30 Hz
GB         0
PC         1.00
  
```

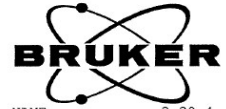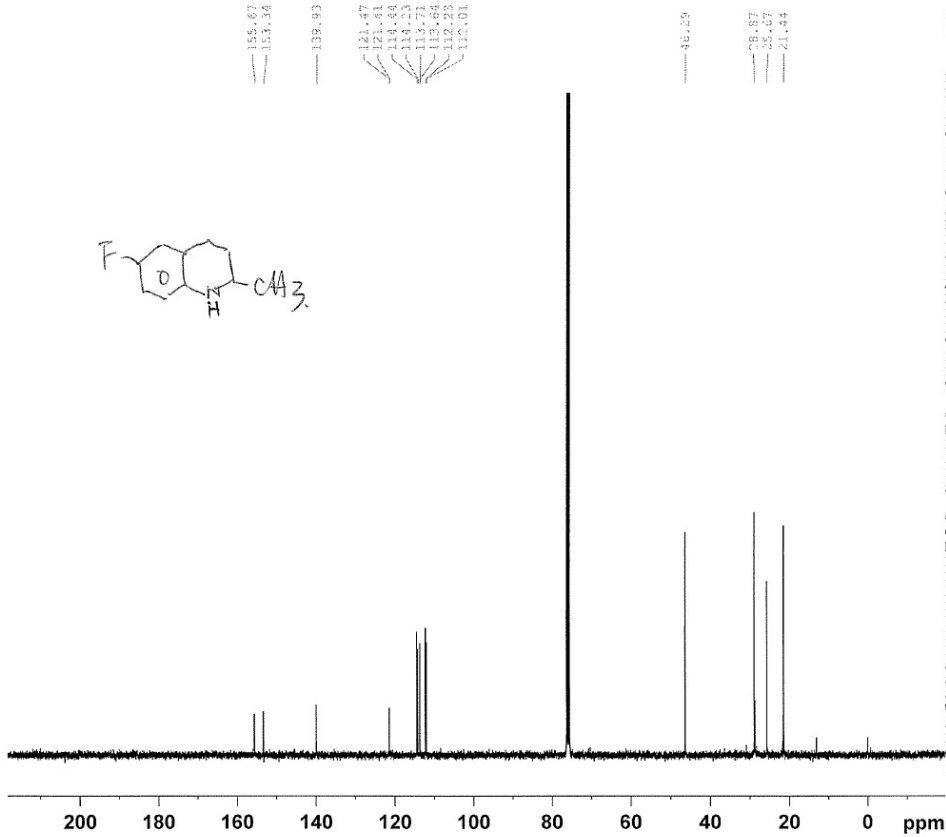

NAME 3-30-4  
EXPNO 3  
PROCNO 1  
Date\_ 20150821  
Time 13.49  
INSTRUM spect  
PROBHD 5 mm PABBO BB-  
PULPROG zgpg30  
TD 65536  
SOLVENT CDCl3  
NS 1000  
DS 2  
SWH 24038.461 Hz  
FIDRES 0.366798 Hz  
AQ 1.3631988 sec  
RG 2050  
DW 20.800 usec  
DE 6.50 usec  
TE 302.4 K  
D1 2.00000000 sec  
D11 0.03000000 sec  
TD0 1

===== CHANNEL f1 =====  
NUC1 13C  
P1 8.50 usec  
PL1 1.00 dB  
PL1W 75.02186584 W  
SFO1 100.6228298 MHz

===== CHANNEL f2 =====  
CPDPRG2 waltz16  
NUC2 1H  
PCPD2 90.00 usec  
PL2 -2.00 dB  
PL12 18.23 dB  
PL13 19.00 dB  
PL2W 31.17179108 W  
PL12W 0.29563907 W  
PL13W 0.24760634 W  
SFO2 400.1316005 MHz  
SI 32768  
SF 100.6128722 MHz  
WDW EM  
SSB 0  
LB 1.00 Hz  
GB 0  
PC 1.40

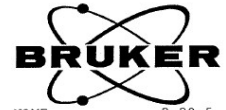

NAME 3-30-5  
EXFNO 2  
PROCNO 1  
Date 20150821  
Time 14.55  
INSTRUM spect  
PROBHD 5 mm PABBO BB-  
PULPROG zg30  
TD 65536  
SOLVENT CDCl3  
NS 32  
DS 2  
SWH 8223.685 Hz  
FIDRES 0.125483 Hz  
AQ 3.9846387 sec  
RG 181  
DW 60.800 usec  
DE 6.50 usec  
TE 301.9 K  
D1 1.0000000 sec  
TDO 1

===== CHANNEL f1 =====  
NUC1 1H  
P1 8.76 usec  
PL1 -2.00 dB  
PL1W 31.17179108 W  
SF01 400.1324710 MHz  
SI 32768  
SF 400.1300139 MHz  
WDW EM  
SSB 0  
LB 0.30 Hz  
GB 0  
PC 1.00

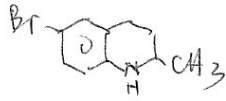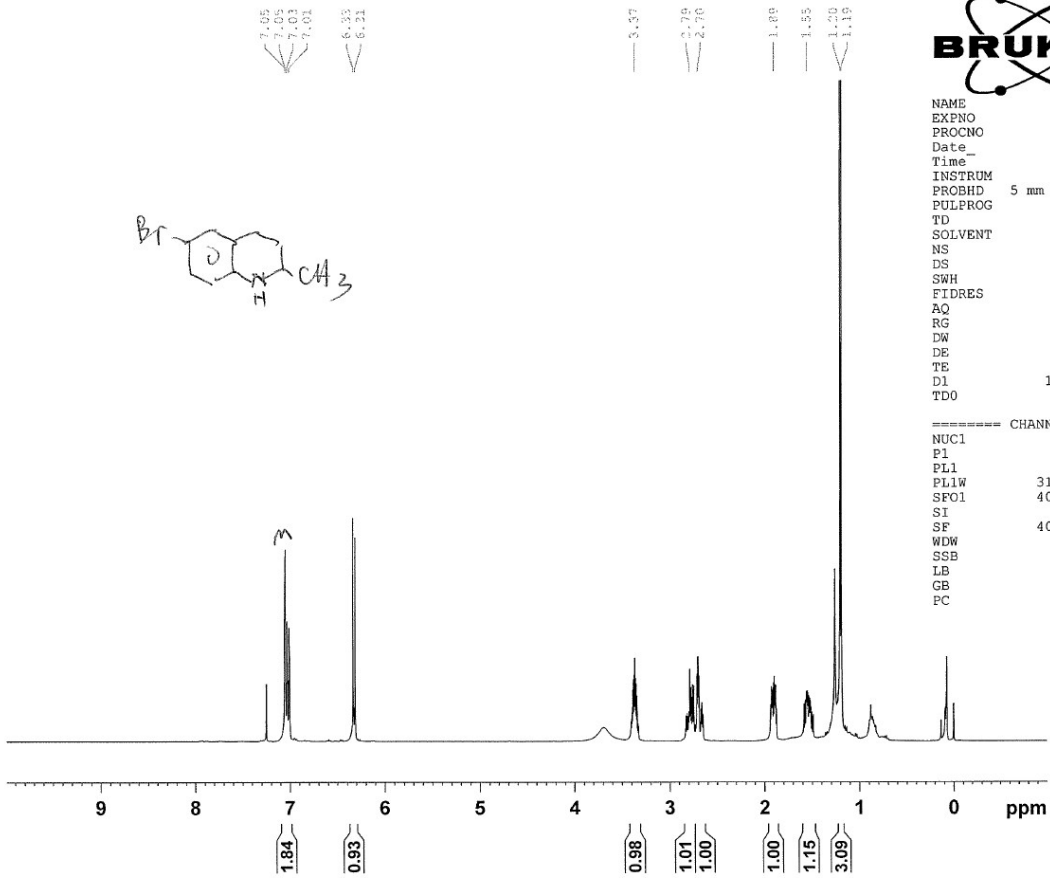

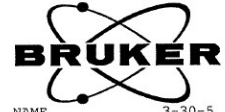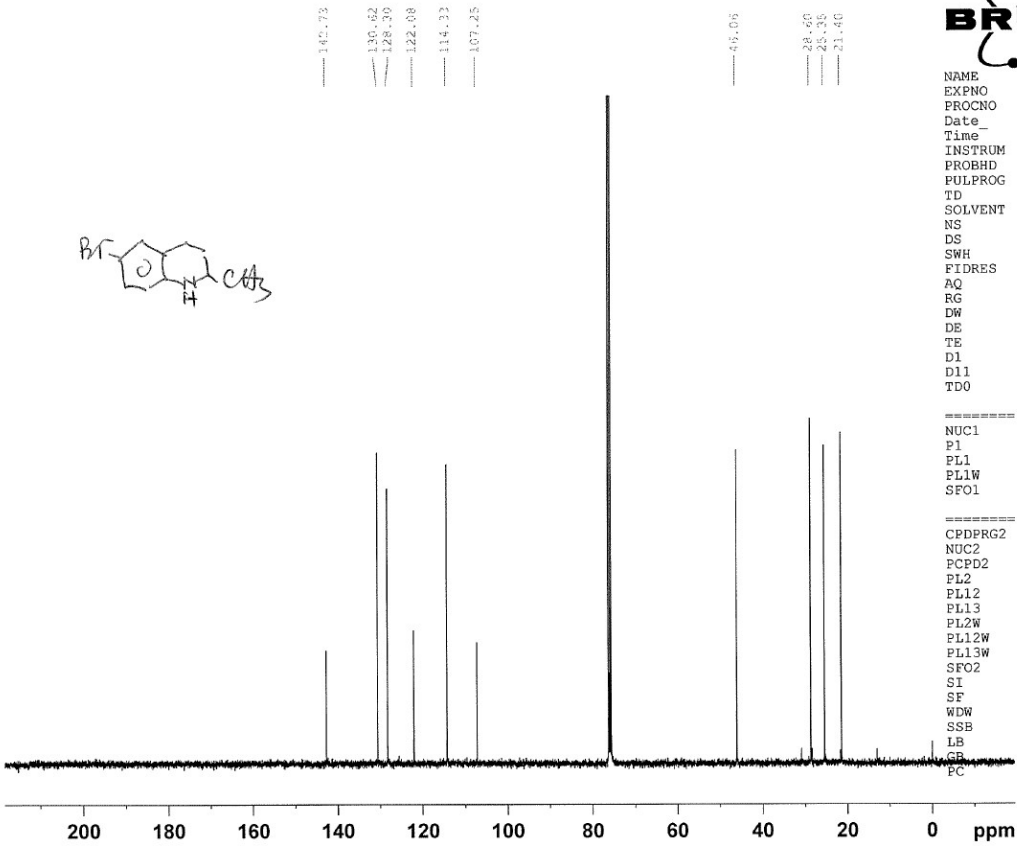

NAME 3-30-5  
EXPNO 3  
PROCNO 1  
Date\_ 20150821  
Time\_ 15.31  
INSTRUM spect  
PROBHD 5 mm PABBO BB-  
PULPROG zgpg30  
TD 65536  
SOLVENT CDC13  
NS 1000  
DS 2  
SWH 24038.461 Hz  
FIDRES 0.366798 Hz  
AQ 1.3631988 sec  
RG 2050  
DW 20.800 usec  
DE 6.50 usec  
TE 303.3 K  
D1 2.00000000 sec  
D11 0.03000000 sec  
TDO 1

===== CHANNEL f1 =====  
NUC1 13C  
P1 8.50 usec  
PL1 1.00 dB  
PL1W 75.02186584 W  
SF01 100.6228298 MHz

===== CHANNEL f2 =====  
CPDPRG2 waltz16  
NUC2 1H  
PCPD2 90.00 usec  
PL2 -2.00 dB  
PL12 18.23 dB  
PL13 19.00 dB  
PL2W 31.17179108 W  
PL12W 0.29563907 W  
PL13W 0.24760634 W  
SFO2 400.1316005 MHz  
SI 32768  
SF 100.6128733 MHz  
WDW EM  
SSB 0  
LB 1.00 Hz  
GB 0  
PC 1.40

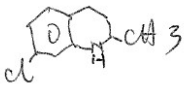

6.69  
6.63  
6.59  
6.54  
6.52  
6.42  
6.42

3.38

2.69

1.90

1.95

1.26

1.19

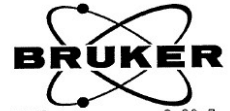

NAME 3-30-7  
EXPNO 2  
PROCNO 1  
Date 20150821  
Time 16.02  
INSTRUM spect  
PROBHD 5 mm PABBO BB-  
PULPROG zg30  
TD 65536  
SOLVENT CDC13  
NS 32  
DS 2  
SWH 8223.685 Hz  
FIDRES 0.125483 Hz  
AQ 3.9846387 sec  
RG 161  
DW 60.800 usec  
DE 6.50 usec  
TE 302.1 K  
D1 1.0000000 sec  
TD0 1

===== CHANNEL f1 =====  
NUC1 1H  
P1 8.76 usec  
PL1 -2.00 dB  
PL1W 31.17179108 W  
SF01 400.1324710 MHz  
SI 32768  
SF 400.1300151 MHz  
WDW EM  
SSB 0  
LB 0.30 Hz  
GB 0  
PC 1.00

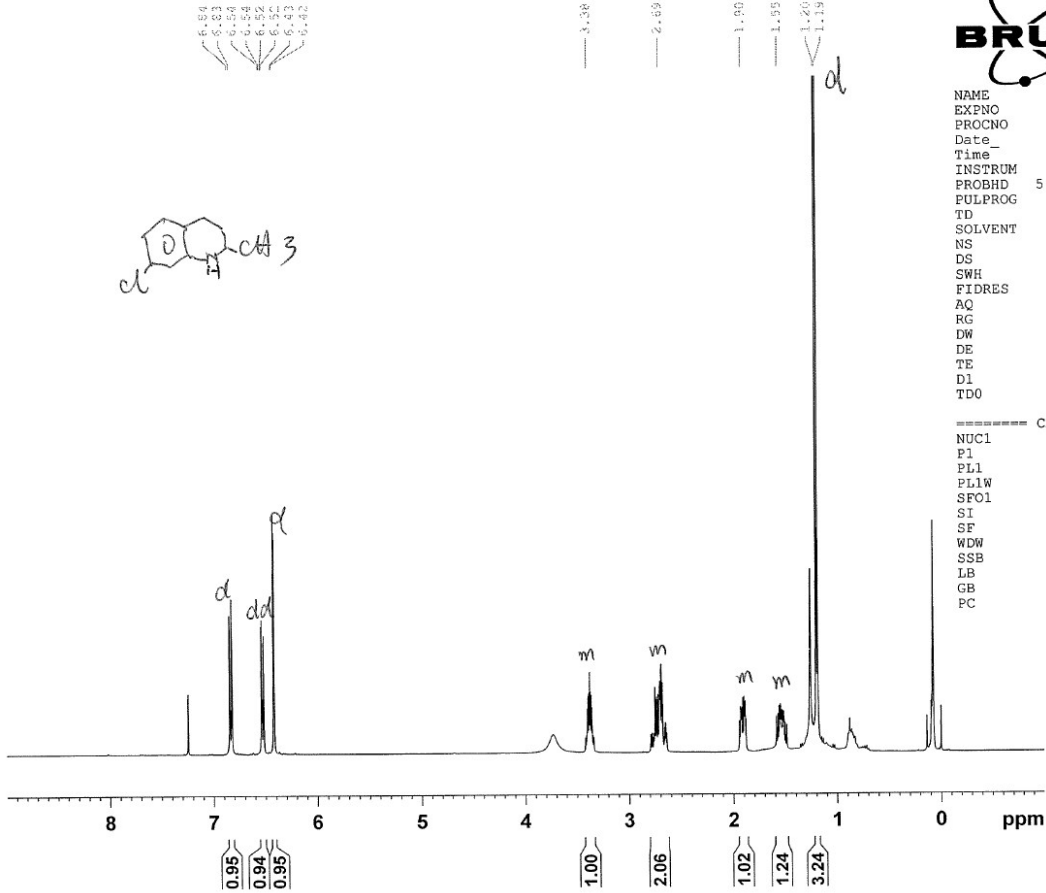

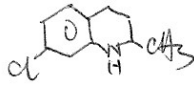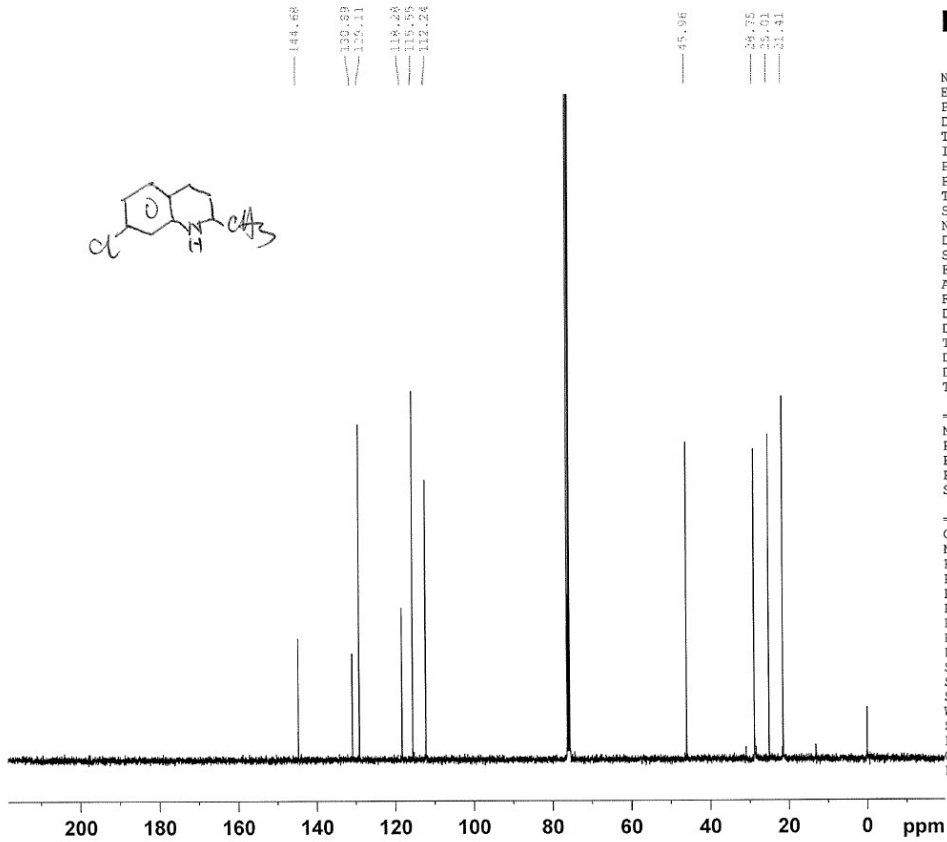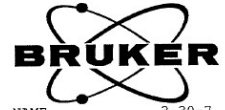

```

NAME          3-30-7
EXPNO         3
PROCNO        1
Date_         20150821
Time          17.01
INSTRUM       spect
PROBHD        5 mm PABBO BB-
PULPROG       zgpg30
TD            65536
SOLVENT       CDCl3
NS            1000
DS            2
SWH           24038.461 Hz
FIDRES        0.366798 Hz
AQ            1.3631988 sec
RG            2050
DW            20.800 usec
DE            6.50 usec
TE            303.5 K
D1            2.00000000 sec
D11           0.03000000 sec
TD0           1
  
```

```

===== CHANNEL f1 =====
NUC1          13C
P1            8.50 usec
PL1           1.00 dB
PL1W          75.02186584 W
SFO1          100.6228298 MHz
  
```

```

===== CHANNEL f2 =====
CPDPRG2       waltz16
NUC2          1H
PCPD2         90.00 usec
PL2           -2.00 dB
PL12          18.23 dB
PL13          19.00 dB
PL2W          31.17179108 W
PL12W         0.29563907 W
PL13W         0.24760634 W
SFO2          400.1316005 MHz
SI            32768
SF            100.6128730 MHz
WDW           EM
SSB           0
LB            1.00 Hz
GB            0
PC            1.40
  
```



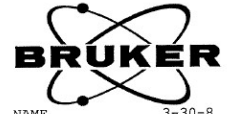

NAME 3-30-8  
EXPNO 2  
PROCNO 1  
Date\_ 20150821  
Time\_ 17.09  
INSTRUM spect  
PROBHD 5 mm PABBO BB-  
PULPROG zg30  
TD 65536  
SOLVENT CDCl3  
NS 32  
DS 2  
SWH 8223.685 Hz  
FIDRES 0.125483 Hz  
AQ 3.9846387 sec  
RG 203  
DW 60.800 usec  
DE 6.50 usec  
TE 302.2 K  
D1 1.0000000 sec  
TD0 1

===== CHANNEL f1 =====  
NUC1 1H  
P1 8.76 usec  
PL1 -2.00 dB  
PL1W 31.17179108 W  
SFO1 400.1324710 MHz  
SI 32768  
SF 400.1300154 MHz  
WDW EM  
SSB 0  
LB 0.30 Hz  
GB 0  
PC 1.00

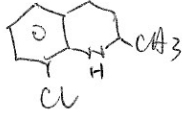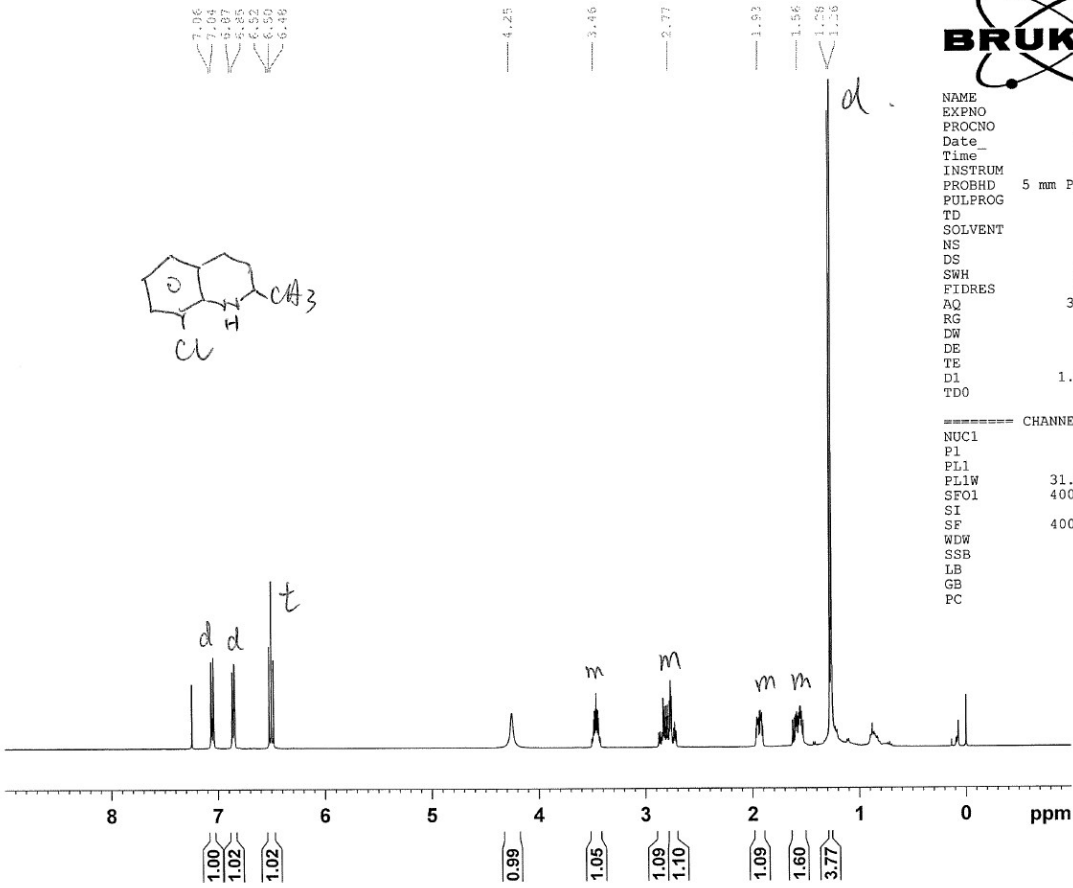

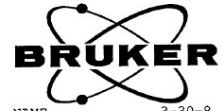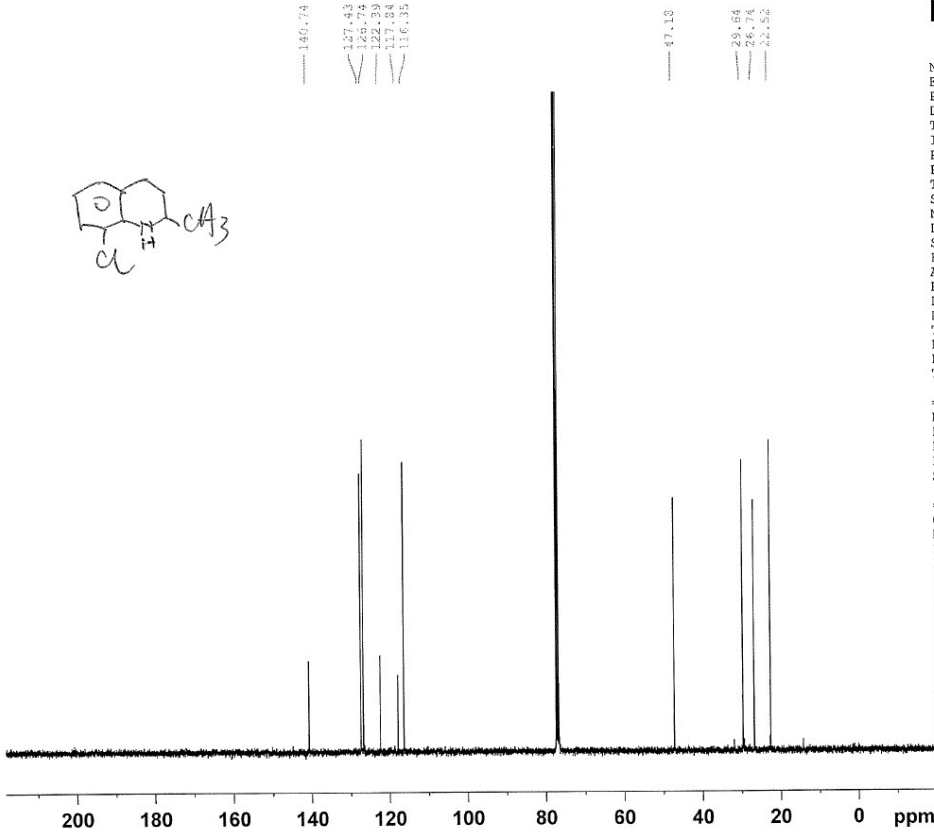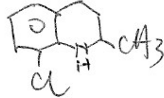

NAME 3-30-8  
EXPNO 3  
PROCNO 1  
Date\_ 20150821  
Time\_ 18.08  
INSTRUM spect  
PROBHD 5 mm PABBO BB-  
PULPROG zgpg30  
TD 65536  
SOLVENT CDCl3  
NS 1000  
DS 2  
SWH 24038.461 Hz  
FIDRES 0.366798 Hz  
AQ 1.3631988 sec  
RG 2050  
DW 20.800 usec  
DE 6.50 usec  
TE 303.6 K  
D1 2.00000000 sec  
D11 0.03000000 sec  
TDO 1

===== CHANNEL f1 =====  
NUC1 13C  
P1 8.50 usec  
PL1 1.00 dB  
PL1W 75.02186584 W  
SFO1 100.6228298 MHz

===== CHANNEL f2 =====  
CPDPRG2 waltz16  
NUC2 1H  
PCPD2 90.00 usec  
PL2 -2.00 dB  
PL12 18.23 dB  
PL13 19.00 dB  
PL2W 31.17179108 W  
PL12W 0.29563907 W  
PL13W 0.24760634 W  
SFO2 400.1316005 MHz  
SI 32768  
SF 100.6127690 MHz  
WDW EM  
SSB 0  
LB 1.00 Hz  
GB 0  
PC 1.40

6.57  
6.55  
6.53  
6.51  
6.49  
6.47  
6.45  
6.43

3.27  
3.25  
3.31  
2.77  
2.70  
2.68  
2.66  
1.99  
1.68

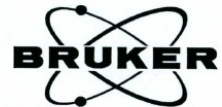

```

NAME      3-53-11
EXPNO     3
PROCNO    1
Date_     20150915
Time      16.40
INSTRUM   spect
PROBHD    5 mm PABBO BB-
PULPROG   zg30
TD         65536
SOLVENT   CDC13
NS         64
DS         2
SWH       8223.685 Hz
FIDRES    0.125483 Hz
AQ         3.9846387 sec
RG         114
DW         60.800 usec
DE         6.50 usec
TE         298.0 K
D1         1.00000000 sec
TDO        1

===== CHANNEL f1 =====
NUC1       1H
P1         8.76 usec
PL1        -2.00 dB
PL1W       31.17179108 W
SFO1       400.1324710 MHz
SI         32768
SF         400.1300185 MHz
WDW        EM
SSB        0
LB         0.30 Hz
GB         0
PC         1.00
  
```

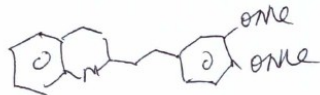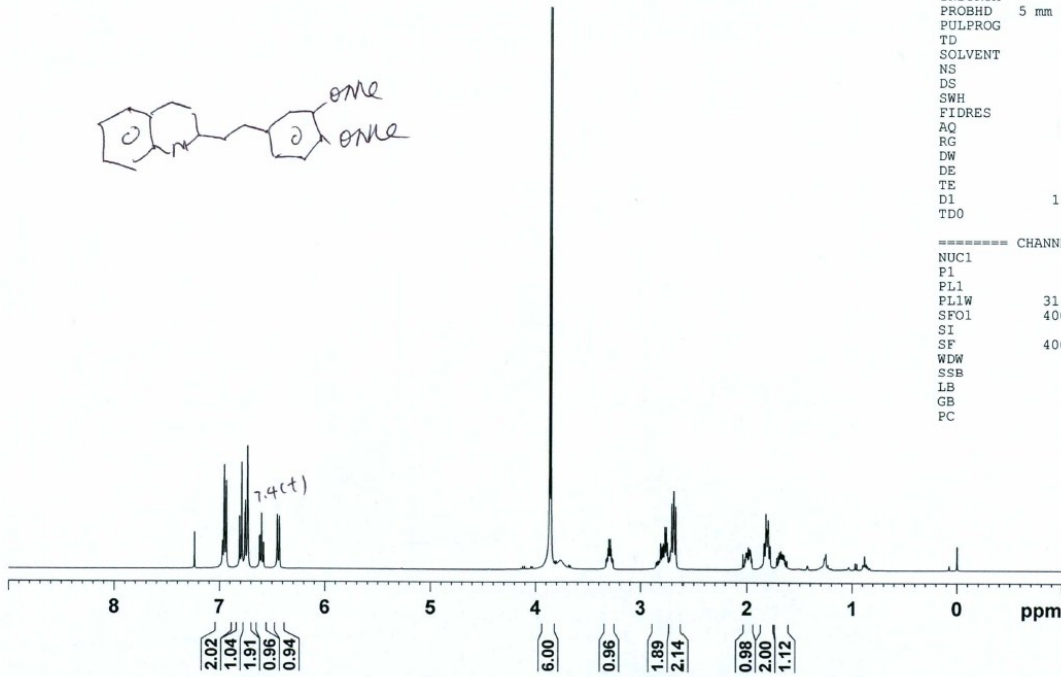

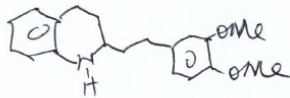

146.02  
147.37  
148.54  
134.52  
129.27  
121.30  
120.17  
117.05  
114.16  
111.74  
111.43

56.10  
55.30  
51.25  
38.44  
31.86  
28.05  
26.23

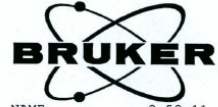

NAME 3-53-11  
EXPNO 4  
PROCNO 1  
Date\_ 20150915  
Time\_ 17.38  
INSTRUM spect  
PROBHD 5 mm PABBO BB-  
PULPROG zgpg30  
TD 65536  
SOLVENT CDCl3  
NS 991  
DS 2  
SWH 24038.461 Hz  
FIDRES 0.366798 Hz  
AQ 1.3631988 sec  
RG 2050  
DW 20.800 usec  
DE 6.50 usec  
TE 300.1 K  
D1 2.0000000 sec  
D11 0.0300000 sec  
TDO 1

===== CHANNEL f1 =====  
NUC1 13C  
P1 8.50 usec  
PL1 1.00 dB  
PL1W 75.02186584 W  
SFO1 100.6228298 MHz

===== CHANNEL f2 =====  
CPDPRG2 waltz16  
NUC2 1H  
PCPD2 90.00 usec  
PL2 -2.00 dB  
PL12 18.23 dB  
PL13 19.00 dB  
PL2W 31.17179108 W  
PL12W 0.29563907 W  
PL13W 0.24760634 W  
SFO2 400.1316005 MHz  
SI 32768  
SF 100.6127690 MHz  
WDW EM  
SSB 0  
LB 1.00 Hz  
GB 0  
PC 1.40

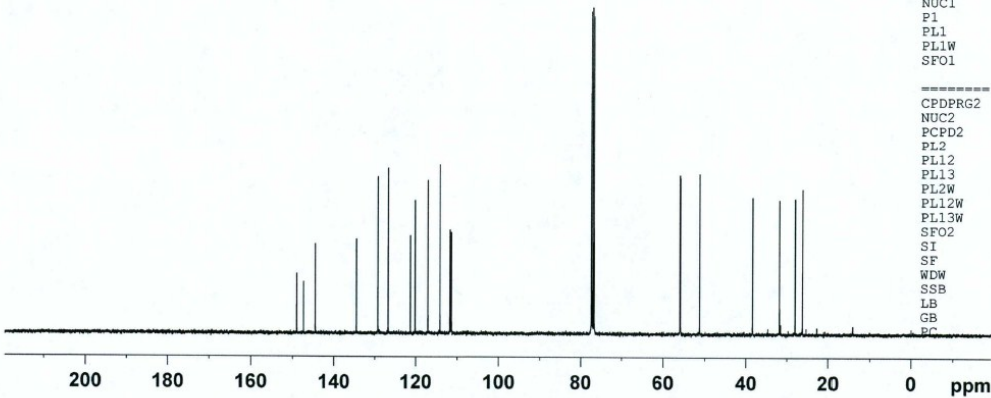

Supplement: SC-007-C5SC04712A-s001.pdf [file SC-007-C5SC04712A-s001.pdf]
